# Supplementary material for: Hard-and-soft phosphinoxide receptors for f-element binding: structure and photophysical properties of europium(iii) complexes
Source: Royal Society of Chemistry journal article supplement (doi:10.1039/c6dt04681a), 2017-01-01
Supplement: c6dt04681a1.pdf [file c6dt04681a1.pdf]

**Hard-and-soft phosphinoxide receptors for f-element binding: the influence of nature of ligand and counter-ion on the structure and photophysical properties of europium(III) complexes**

Nataliya E. Borisova,<sup>\*a, b</sup> Anastasia V. Kharcheva,<sup>a, c</sup> Svetlana V. Patsaeva,<sup>c</sup> Leonid A. Korotkov,<sup>a</sup> Sergey Bakaev,<sup>a</sup> Marina D. Reshetova,<sup>a</sup> Konstantin A. Lyssenko,<sup>b</sup> Elena V. Belova<sup>d</sup> and Boris F. Myasoedov

**Supplementary data**

**List**

|                                                                                                                                                                                                                                                                          |    |
|--------------------------------------------------------------------------------------------------------------------------------------------------------------------------------------------------------------------------------------------------------------------------|----|
| PyPPO Structure.....                                                                                                                                                                                                                                                     | 4  |
| Table 1 Crystal data and structure refinement for PyPPO.....                                                                                                                                                                                                             | 4  |
| Table 2 Atomic coordinates ( $\times 10^4$ ) and equivalent isotropic displacement parameters ( $\text{\AA}^2 \times 10^3$ ) for PyPPO. $U(\text{eq})$ is defined as one third of the trace of the orthogonalized $U^{ij}$ tensor. ....                                  | 5  |
| Table 3 Bond lengths [ $\text{\AA}$ ] and angles [ $^\circ$ ] for PyPPO.....                                                                                                                                                                                             | 6  |
| Table 4 Anisotropic displacement parameters ( $\text{\AA}^2 \times 10^3$ ) for PyPPO. The anisotropic displacement factor exponent takes the form: $-2\pi^2[h^2 a^{*2}U^{11} + \dots + 2 h k a^* b^* U^{12}]$ .....                                                      | 8  |
| Table 5 Hydrogen coordinates ( $\times 10^4$ ) and isotropic displacement parameters ( $\text{\AA}^2 \times 10^3$ ) for PyPPO. .                                                                                                                                         | 9  |
| Table 6 Torsion angles [ $^\circ$ ] for PyPPO.....                                                                                                                                                                                                                       | 10 |
| Table 7 Hydrogen bonds for PyPPO [ $\text{\AA}$ and $^\circ$ ]. ....                                                                                                                                                                                                     | 11 |
| Figure 1 General view of the unit cell independent part of PyPPO structure with the representation of intermolecular O(1W)-H...O(1) hydrogen bond by a dash line. Non-hydrogen atoms are represented as probability ellipsoids of atomic displacements ( $p=0.5$ ). .... | 12 |
| Figure 2 A fragment of PyPPO crystal packing along the $ab$ plane of the unit cell.....                                                                                                                                                                                  | 13 |
| DPPO Structure .....                                                                                                                                                                                                                                                     | 14 |
| Table 8 Crystal data and structure refinement for DPPO.....                                                                                                                                                                                                              | 14 |
| Table 9 Atomic coordinates ( $\times 10^4$ ) and equivalent isotropic displacement parameters ( $\text{\AA}^2 \times 10^3$ ) for DPPO. $U(\text{eq})$ is defined as one third of the trace of the orthogonalized $U^{ij}$ tensor. ....                                   | 15 |
| Table 10 Bond lengths [ $\text{\AA}$ ] and angles [ $^\circ$ ] for DPPO.....                                                                                                                                                                                             | 16 |
| Table 11 Anisotropic displacement parameters ( $\text{\AA}^2 \times 10^3$ ) for DPPO. The anisotropic displacement factor exponent takes the form: $-2\pi^2[h^2 a^{*2}U^{11} + \dots + 2 h k a^* b^* U^{12}]$ .....                                                      | 18 |

|                                                                                                                                                                                                                                                                                                                                                             |    |
|-------------------------------------------------------------------------------------------------------------------------------------------------------------------------------------------------------------------------------------------------------------------------------------------------------------------------------------------------------------|----|
| Table 12 Hydrogen coordinates ( $\times 10^4$ ) and isotropic displacement parameters ( $\text{\AA}^2 \times 10^3$ ) for DPPO. ....                                                                                                                                                                                                                         | 19 |
| Table 13 Torsion angles [ $^\circ$ ] for DPPO. ....                                                                                                                                                                                                                                                                                                         | 20 |
| Figure 3 General view of the DPPO structure in crystal. Non-hydrogen atoms are represented as probability ellipsoids of atomic vibrations ( $\rho=0.5$ ). ....                                                                                                                                                                                              | 21 |
| Figure 4 A fragment of DPPO crystal packing along the <i>ab</i> plane of the unit cell. ....                                                                                                                                                                                                                                                                | 22 |
| Structure of 9-diphenylphosphinoylphenanthroline-2. ....                                                                                                                                                                                                                                                                                                    | 23 |
| Table 14 Crystal data and structure refinement for PO-1. ....                                                                                                                                                                                                                                                                                               | 23 |
| Table 15 Atomic coordinates ( $\times 10^4$ ) and equivalent isotropic displacement parameters ( $\text{\AA}^2 \times 10^3$ ) for PO-1. $U(\text{eq})$ is defined as one third of the trace of the orthogonalized $U^{ij}$ tensor. ....                                                                                                                     | 24 |
| Table 16 Bond lengths [ $\text{\AA}$ ] and angles [ $^\circ$ ] for PO-1. ....                                                                                                                                                                                                                                                                               | 25 |
| Table 17 Anisotropic displacement parameters ( $\text{\AA}^2 \times 10^3$ ) for PO-1. The anisotropic displacement factor exponent takes the form: $-2\pi^2 [ h^2 a^{*2} U^{11} + \dots + 2 h k a^* b^* U^{12} ]$ ....                                                                                                                                      | 27 |
| Table 18 Hydrogen coordinates ( $\times 10^4$ ) and isotropic displacement parameters ( $\text{\AA}^2 \times 10^3$ ) for PO-1. ....                                                                                                                                                                                                                         | 28 |
| Table 19 Torsion angles [ $^\circ$ ] for PO-1. ....                                                                                                                                                                                                                                                                                                         | 29 |
| Table 20 Hydrogen bonds for PO-1 [ $\text{\AA}$ and $^\circ$ ]. ....                                                                                                                                                                                                                                                                                        | 30 |
| Figure 5 A general view of the PO-1 structure in representation of non-hydrogen atoms by probability ellipsoids of atomic displacements ( $\rho=0.5$ ). ....                                                                                                                                                                                                | 31 |
| Figure 6 The centrosymmetric hydrogen-bonded dimer of PO-1 in crystal in representation of non-hydrogen atoms by probability ellipsoids of atomic displacements ( $\rho=0.5$ ). All hydrogen atoms are omitted for clarity with the only exception of the H(10N) atom involved in the H-bond. Atom labels are presented only for the independent part. .... | 32 |
| Figure 7 A fragment of the PO-1 crystal packing along the <i>ab</i> plane. ....                                                                                                                                                                                                                                                                             | 33 |
| PnPPO Structure .....                                                                                                                                                                                                                                                                                                                                       | 34 |
| Table 21 Crystal data and structure refinement for PnPPO. ....                                                                                                                                                                                                                                                                                              | 34 |
| Table 22 Atomic coordinates ( $\times 10^4$ ) and equivalent isotropic displacement parameters ( $\text{\AA}^2 \times 10^3$ ) for PnPPO. $U(\text{eq})$ is defined as one third of the trace of the orthogonalized $U^{ij}$ tensor. ....                                                                                                                    | 35 |
| Table 23 Bond lengths [ $\text{\AA}$ ] and angles [ $^\circ$ ] for PnPPO. ....                                                                                                                                                                                                                                                                              | 36 |

|                                                                                                                                                                                                                                                                           |    |
|---------------------------------------------------------------------------------------------------------------------------------------------------------------------------------------------------------------------------------------------------------------------------|----|
| Table 24 Anisotropic displacement parameters ( $\text{\AA}^2 \times 10^3$ ) for PnPPO. The anisotropic displacement factor exponent takes the form: $-2\pi^2 [ h^2 a^{*2} U^{11} + \dots + 2 h k a^* b^* U^{12} ]$ .....                                                  | 38 |
| Table 25 Hydrogen coordinates ( $\times 10^4$ ) and isotropic displacement parameters ( $\text{\AA}^2 \times 10^3$ ) for PnPPO. ....                                                                                                                                      | 39 |
| Table 26 Torsion angles [ $^\circ$ ] for PnPPO.....                                                                                                                                                                                                                       | 40 |
| Figure 8 The general view of PnPPO in the representation of non-hydrogen atoms as probability ellipsoids of atomic displacements ( $p=0.5$ ). Hydrogen atoms are omitted for clarity.....                                                                                 | 42 |
| Structure of DPPOGd(NO <sub>3</sub> ) <sub>3</sub> .....                                                                                                                                                                                                                  | 43 |
| Figure 9 General view of one of the two independent molecules in DPPOGd(NO <sub>3</sub> ) <sub>3</sub> with atoms given as thermal ellipsoids ( $p=50\%$ ). Hydrogen atoms are omitted for clarity. ....                                                                  | 43 |
| Table 27 Crystal data and structure refinement for DPPOGd(NO <sub>3</sub> ) <sub>3</sub> .....                                                                                                                                                                            | 44 |
| Table 28 Atomic coordinates ( $\times 10^4$ ) and equivalent isotropic displacement parameters ( $\text{\AA}^2 \times 10^3$ ) for DPPOGd(NO <sub>3</sub> ) <sub>3</sub> . $U(\text{eq})$ is defined as one third of the trace of the orthogonalized $U^{ij}$ tensor. .... | 45 |
| Table 29 Bond lengths [ $\text{\AA}$ ] and angles [ $^\circ$ ] for DPPOGd(NO <sub>3</sub> ) <sub>3</sub> .....                                                                                                                                                            | 48 |
| Table 30 Anisotropic displacement parameters ( $\text{\AA}^2 \times 10^3$ ) for DPPOGd(NO <sub>3</sub> ) <sub>3</sub> . The anisotropic displacement factor exponent takes the form: $-2\pi^2 [ h^2 a^{*2} U^{11} + \dots + 2 h k a^* b^* U^{12} ]$ .....                 | 54 |
| Table 31 Hydrogen coordinates ( $\times 10^4$ ) and isotropic displacement parameters ( $\text{\AA}^2 \times 10^3$ ) for DPPOGd(NO <sub>3</sub> ) <sub>3</sub> .....                                                                                                      | 57 |
| Table 32 Torsion angles [ $^\circ$ ] for DPPOGd(NO <sub>3</sub> ) <sub>3</sub> .....                                                                                                                                                                                      | 59 |
| Structure of PnPPOEu(TFA)3H <sub>2</sub> O .....                                                                                                                                                                                                                          | 62 |
| Table 33 Crystal data and structure refinement for PnPPOEu(TFA)3H <sub>2</sub> O. ....                                                                                                                                                                                    | 62 |
| Table 34 Atomic coordinates ( $\times 10^4$ ) and equivalent isotropic displacement parameters ( $\text{\AA}^2 \times 10^3$ ) for PnPPOEu(TFA)3H <sub>2</sub> O. $U(\text{eq})$ is defined as one third of the trace of the orthogonalized $U^{ij}$ tensor. ....          | 63 |
| Table 35 Bond lengths [ $\text{\AA}$ ] and angles [ $^\circ$ ] for PnPPOEu(TFA)3H <sub>2</sub> O. ....                                                                                                                                                                    | 65 |
| Table 36 Anisotropic displacement parameters ( $\text{\AA}^2 \times 10^3$ ) for PnPPOEu(TFA)3H <sub>2</sub> O. The anisotropic displacement factor exponent takes the form: $-2\pi^2 [ h^2 a^{*2} U^{11} + \dots + 2 h k a^* b^* U^{12} ]$ .....                          | 69 |
| Table 37 Hydrogen coordinates ( $\times 10^4$ ) and isotropic displacement parameters ( $\text{\AA}^2 \times 10^3$ ) for PnPPOEu(TFA)3H <sub>2</sub> O. ....                                                                                                              | 71 |
| Table 38 Hydrogen bonds for PnPPOEu(TFA)3H <sub>2</sub> O [ $\text{\AA}$ and $^\circ$ ]. ....                                                                                                                                                                             | 72 |

Figure 10 The independent part of the PnPPOEu(TFA)3H2O unit cell. Non-hydrogen atoms are given as probability ellipsoids of atomic displacements, hydrogen atoms at carbon atoms are omitted for clarity. The hydrogen bonds are shown by dashed lines.....73

Figure 11 The distorted bicapped-trigonalaniprismatic environment of the Eu ion within the PnPPOEu(TFA)3H2O crystal: the O(2), O(1B), O(1W) and O(1A), O(1C), O(1) atoms form two bases of prism while the nitrogen atoms serve as two caps. ....74

Figure 12 A fragment of H-bonded chain within the PnPPOEu(TFA)3H2O crystal. ....75

## PyPPO Structure

**Table 1 Crystal data and structure refinement for PyPPO.**

|                                   |                                                                 |                    |
|-----------------------------------|-----------------------------------------------------------------|--------------------|
| Identification code               | a                                                               |                    |
| Empirical formula                 | C <sub>29</sub> H <sub>25</sub> N O <sub>3</sub> P <sub>2</sub> |                    |
| Formula weight                    | 497.44                                                          |                    |
| Temperature                       | 120(2) K                                                        |                    |
| Wavelength                        | 0.71073 Å                                                       |                    |
| Crystal system                    | Triclinic                                                       |                    |
| Space group                       | P-1                                                             |                    |
| Unit cell dimensions              | a = 10.5163(7) Å                                                | α = 100.1501(13)°. |
|                                   | b = 10.9689(7) Å                                                | β = 104.7237(14)°. |
|                                   | c = 12.9195(8) Å                                                | γ = 115.6149(12)°. |
| Volume                            | 1227.77(14) Å <sup>3</sup>                                      |                    |
| Z                                 | 2                                                               |                    |
| Density (calculated)              | 1.346 Mg/m <sup>3</sup>                                         |                    |
| Absorption coefficient            | 0.210 mm <sup>-1</sup>                                          |                    |
| F(000)                            | 520                                                             |                    |
| Crystal size                      | 0.380 x 0.210 x 0.180 mm <sup>3</sup>                           |                    |
| Theta range for data collection   | 1.725 to 30.155°.                                               |                    |
| Index ranges                      | -14 ≤ h ≤ 14, -15 ≤ k ≤ 15, -18 ≤ l ≤ 18                        |                    |
| Reflections collected             | 16095                                                           |                    |
| Independent reflections           | 7220 [R(int) = 0.0363]                                          |                    |
| Completeness to theta = 25.242°   | 100.0 %                                                         |                    |
| Absorption correction             | Semi-empirical from equivalents                                 |                    |
| Max. and min. transmission        | 0.969 and 0.912                                                 |                    |
| Refinement method                 | Full-matrix least-squares on F <sup>2</sup>                     |                    |
| Data / restraints / parameters    | 7220 / 0 / 318                                                  |                    |
| Goodness-of-fit on F <sup>2</sup> | 1.018                                                           |                    |
| Final R indices [I > 2σ(I)]       | R1 = 0.0486, wR2 = 0.1017                                       |                    |
| R indices (all data)              | R1 = 0.0741, wR2 = 0.1140                                       |                    |
| Extinction coefficient            | n/a                                                             |                    |
| Largest diff. peak and hole       | 0.467 and -0.353 e. Å <sup>-3</sup>                             |                    |

**Table 2 Atomic coordinates ( $\times 10^4$ ) and equivalent isotropic displacement parameters ( $\text{\AA}^2 \times 10^3$ ) for PyPPO.  $U(\text{eq})$  is defined as one third of the trace of the orthogonalized  $U^{ij}$  tensor.**

|       | x        | y        | z        | U(eq) |
|-------|----------|----------|----------|-------|
| P(1)  | 6049(1)  | 3241(1)  | 2173(1)  | 13(1) |
| P(2)  | 10774(1) | 8480(1)  | 3118(1)  | 12(1) |
| N(1)  | 8287(2)  | 5968(2)  | 2768(1)  | 13(1) |
| O(1)  | 4522(1)  | 2472(1)  | 2233(1)  | 19(1) |
| O(1W) | 7175(2)  | 7177(2)  | 6544(1)  | 28(1) |
| O(2)  | 11480(1) | 10014(1) | 3802(1)  | 17(1) |
| C(1)  | 6992(2)  | 5154(2)  | 2909(1)  | 12(1) |
| C(2)  | 6346(2)  | 5719(2)  | 3528(1)  | 15(1) |
| C(3)  | 7063(2)  | 7190(2)  | 4015(1)  | 16(1) |
| C(4)  | 8397(2)  | 8046(2)  | 3876(1)  | 14(1) |
| C(5)  | 8973(2)  | 7396(2)  | 3255(1)  | 12(1) |
| C(6)  | 5949(2)  | 3133(2)  | 745(1)   | 14(1) |
| C(7)  | 4768(2)  | 3216(2)  | 40(2)    | 20(1) |
| C(8)  | 4675(2)  | 3208(2)  | -1050(2) | 24(1) |
| C(9)  | 5728(2)  | 3084(2)  | -1450(2) | 25(1) |
| C(10) | 6898(2)  | 2986(2)  | -753(2)  | 27(1) |
| C(11) | 7017(2)  | 3019(2)  | 347(2)   | 22(1) |
| C(12) | 7313(2)  | 2618(2)  | 2727(1)  | 15(1) |
| C(13) | 6787(2)  | 1156(2)  | 2288(2)  | 25(1) |
| C(14) | 7725(2)  | 615(2)   | 2646(2)  | 29(1) |
| C(15) | 9183(2)  | 1507(2)  | 3444(2)  | 22(1) |
| C(16) | 9698(2)  | 2949(2)  | 3897(2)  | 22(1) |
| C(17) | 8771(2)  | 3505(2)  | 3538(2)  | 19(1) |
| C(18) | 10400(2) | 8220(2)  | 1629(2)  | 15(1) |
| C(19) | 9166(2)  | 7026(2)  | 756(2)   | 23(1) |
| C(20) | 8968(2)  | 6946(2)  | -365(2)  | 28(1) |
| C(21) | 9985(2)  | 8046(2)  | -622(2)  | 26(1) |
| C(22) | 11220(2) | 9225(2)  | 242(2)   | 26(1) |
| C(23) | 11434(2) | 9320(2)  | 1364(2)  | 21(1) |
| C(24) | 11913(2) | 7704(2)  | 3602(2)  | 15(1) |
| C(25) | 13132(2) | 8483(2)  | 4636(2)  | 20(1) |
| C(26) | 13996(2) | 7895(2)  | 5074(2)  | 25(1) |
| C(27) | 13634(2) | 6534(2)  | 4493(2)  | 25(1) |
| C(28) | 12428(2) | 5753(2)  | 3461(2)  | 23(1) |
| C(29) | 11567(2) | 6332(2)  | 3005(2)  | 19(1) |

**Table 3 Bond lengths [Å] and angles [°] for PyPPO.**

|              |            |                     |            |
|--------------|------------|---------------------|------------|
| P(1)-O(1)    | 1.4877(13) | C(22)-H(22A)        | 0.9500     |
| P(1)-C(12)   | 1.7945(18) | C(23)-H(23A)        | 0.9500     |
| P(1)-C(6)    | 1.8003(18) | C(24)-C(25)         | 1.393(3)   |
| P(1)-C(1)    | 1.8190(17) | C(24)-C(29)         | 1.402(2)   |
| P(2)-O(2)    | 1.4923(12) | C(25)-C(26)         | 1.391(3)   |
| P(2)-C(24)   | 1.7996(18) | C(25)-H(25A)        | 0.9500     |
| P(2)-C(18)   | 1.8052(18) | C(26)-C(27)         | 1.380(3)   |
| P(2)-C(5)    | 1.8243(17) | C(26)-H(26A)        | 0.9500     |
| N(1)-C(5)    | 1.347(2)   | C(27)-C(28)         | 1.385(3)   |
| N(1)-C(1)    | 1.348(2)   | C(27)-H(27A)        | 0.9500     |
| O(1W)-H(1WB) | 0.8257     | C(28)-C(29)         | 1.389(3)   |
| O(1W)-H(1WA) | 0.8823     | C(28)-H(28A)        | 0.9500     |
| C(1)-C(2)    | 1.397(2)   | C(29)-H(29A)        | 0.9500     |
| C(2)-C(3)    | 1.385(2)   |                     |            |
| C(2)-H(2A)   | 0.9500     | O(1)-P(1)-C(12)     | 114.59(8)  |
| C(3)-C(4)    | 1.389(2)   | O(1)-P(1)-C(6)      | 112.36(8)  |
| C(3)-H(3A)   | 0.9500     | C(12)-P(1)-C(6)     | 106.32(8)  |
| C(4)-C(5)    | 1.392(2)   | O(1)-P(1)-C(1)      | 111.42(8)  |
| C(4)-H(4A)   | 0.9500     | C(12)-P(1)-C(1)     | 107.81(8)  |
| C(6)-C(7)    | 1.390(2)   | C(6)-P(1)-C(1)      | 103.60(8)  |
| C(6)-C(11)   | 1.391(2)   | O(2)-P(2)-C(24)     | 112.50(8)  |
| C(7)-C(8)    | 1.385(3)   | O(2)-P(2)-C(18)     | 112.46(8)  |
| C(7)-H(7A)   | 0.9500     | C(24)-P(2)-C(18)    | 108.62(8)  |
| C(8)-C(9)    | 1.382(3)   | O(2)-P(2)-C(5)      | 110.80(7)  |
| C(8)-H(8A)   | 0.9500     | C(24)-P(2)-C(5)     | 104.46(8)  |
| C(9)-C(10)   | 1.386(3)   | C(18)-P(2)-C(5)     | 107.58(8)  |
| C(9)-H(9A)   | 0.9500     | C(5)-N(1)-C(1)      | 117.30(14) |
| C(10)-C(11)  | 1.387(3)   | H(1WB)-O(1W)-H(1WA) | 106.0      |
| C(10)-H(10A) | 0.9500     | N(1)-C(1)-C(2)      | 123.35(15) |
| C(11)-H(11A) | 0.9500     | N(1)-C(1)-P(1)      | 115.77(12) |
| C(12)-C(17)  | 1.389(2)   | C(2)-C(1)-P(1)      | 120.80(13) |
| C(12)-C(13)  | 1.398(2)   | C(3)-C(2)-C(1)      | 118.48(15) |
| C(13)-C(14)  | 1.383(3)   | C(3)-C(2)-H(2A)     | 120.8      |
| C(13)-H(13A) | 0.9500     | C(1)-C(2)-H(2A)     | 120.8      |
| C(14)-C(15)  | 1.383(3)   | C(2)-C(3)-C(4)      | 118.94(15) |
| C(14)-H(14A) | 0.9500     | C(2)-C(3)-H(3A)     | 120.5      |
| C(15)-C(16)  | 1.382(3)   | C(4)-C(3)-H(3A)     | 120.5      |
| C(15)-H(15A) | 0.9500     | C(3)-C(4)-C(5)      | 118.95(16) |
| C(16)-C(17)  | 1.386(3)   | C(3)-C(4)-H(4A)     | 120.5      |
| C(16)-H(16A) | 0.9500     | C(5)-C(4)-H(4A)     | 120.5      |
| C(17)-H(17A) | 0.9500     | N(1)-C(5)-C(4)      | 122.98(15) |
| C(18)-C(19)  | 1.392(3)   | N(1)-C(5)-P(2)      | 116.91(12) |
| C(18)-C(23)  | 1.399(2)   | C(4)-C(5)-P(2)      | 120.07(13) |
| C(19)-C(20)  | 1.391(3)   | C(7)-C(6)-C(11)     | 119.88(17) |
| C(19)-H(19A) | 0.9500     | C(7)-C(6)-P(1)      | 117.20(13) |
| C(20)-C(21)  | 1.384(3)   | C(11)-C(6)-P(1)     | 122.88(14) |
| C(20)-H(20A) | 0.9500     | C(8)-C(7)-C(6)      | 119.77(17) |
| C(21)-C(22)  | 1.381(3)   | C(8)-C(7)-H(7A)     | 120.1      |
| C(21)-H(21A) | 0.9500     | C(6)-C(7)-H(7A)     | 120.1      |
| C(22)-C(23)  | 1.387(3)   | C(9)-C(8)-C(7)      | 120.43(18) |

|                    |            |                    |            |
|--------------------|------------|--------------------|------------|
| C(9)-C(8)-H(8A)    | 119.8      | C(18)-C(19)-H(19A) | 120.1      |
| C(7)-C(8)-H(8A)    | 119.8      | C(20)-C(19)-H(19A) | 120.1      |
| C(8)-C(9)-C(10)    | 119.89(18) | C(21)-C(20)-C(19)  | 120.58(19) |
| C(8)-C(9)-H(9A)    | 120.1      | C(21)-C(20)-H(20A) | 119.7      |
| C(10)-C(9)-H(9A)   | 120.1      | C(19)-C(20)-H(20A) | 119.7      |
| C(11)-C(10)-C(9)   | 120.15(18) | C(22)-C(21)-C(20)  | 119.77(18) |
| C(11)-C(10)-H(10A) | 119.9      | C(22)-C(21)-H(21A) | 120.1      |
| C(9)-C(10)-H(10A)  | 119.9      | C(20)-C(21)-H(21A) | 120.1      |
| C(10)-C(11)-C(6)   | 119.86(17) | C(21)-C(22)-C(23)  | 120.32(18) |
| C(10)-C(11)-H(11A) | 120.1      | C(21)-C(22)-H(22A) | 119.8      |
| C(6)-C(11)-H(11A)  | 120.1      | C(23)-C(22)-H(22A) | 119.8      |
| C(17)-C(12)-C(13)  | 119.17(16) | C(22)-C(23)-C(18)  | 120.20(18) |
| C(17)-C(12)-P(1)   | 123.83(13) | C(22)-C(23)-H(23A) | 119.9      |
| C(13)-C(12)-P(1)   | 116.98(14) | C(18)-C(23)-H(23A) | 119.9      |
| C(14)-C(13)-C(12)  | 119.93(18) | C(25)-C(24)-C(29)  | 119.76(17) |
| C(14)-C(13)-H(13A) | 120.0      | C(25)-C(24)-P(2)   | 117.82(14) |
| C(12)-C(13)-H(13A) | 120.0      | C(29)-C(24)-P(2)   | 122.34(14) |
| C(15)-C(14)-C(13)  | 120.58(18) | C(24)-C(25)-C(26)  | 119.89(18) |
| C(15)-C(14)-H(14A) | 119.7      | C(24)-C(25)-H(25A) | 120.1      |
| C(13)-C(14)-H(14A) | 119.7      | C(26)-C(25)-H(25A) | 120.1      |
| C(16)-C(15)-C(14)  | 119.68(18) | C(27)-C(26)-C(25)  | 120.14(19) |
| C(16)-C(15)-H(15A) | 120.2      | C(27)-C(26)-H(26A) | 119.9      |
| C(14)-C(15)-H(15A) | 120.2      | C(25)-C(26)-H(26A) | 119.9      |
| C(15)-C(16)-C(17)  | 120.23(18) | C(26)-C(27)-C(28)  | 120.39(18) |
| C(15)-C(16)-H(16A) | 119.9      | C(26)-C(27)-H(27A) | 119.8      |
| C(17)-C(16)-H(16A) | 119.9      | C(28)-C(27)-H(27A) | 119.8      |
| C(16)-C(17)-C(12)  | 120.39(17) | C(27)-C(28)-C(29)  | 120.19(18) |
| C(16)-C(17)-H(17A) | 119.8      | C(27)-C(28)-H(28A) | 119.9      |
| C(12)-C(17)-H(17A) | 119.8      | C(29)-C(28)-H(28A) | 119.9      |
| C(19)-C(18)-C(23)  | 119.31(17) | C(28)-C(29)-C(24)  | 119.61(18) |
| C(19)-C(18)-P(2)   | 124.48(14) | C(28)-C(29)-H(29A) | 120.2      |
| C(23)-C(18)-P(2)   | 116.21(13) | C(24)-C(29)-H(29A) | 120.2      |
| C(18)-C(19)-C(20)  | 119.82(18) |                    |            |

---

Symmetry transformations used to generate equivalent atoms:

**Table 4 Anisotropic displacement parameters ( $\text{\AA}^2 \times 10^3$ ) for PyPPO. The anisotropic displacement factor exponent takes the form:  $-2\pi^2 [ h^2 a^{*2} U^{11} + \dots + 2 h k a^* b^* U^{12} ]$**

|       | U11   | U22   | U33   | U23   | U13   | U12   |
|-------|-------|-------|-------|-------|-------|-------|
| P(1)  | 12(1) | 11(1) | 14(1) | 4(1)  | 5(1)  | 5(1)  |
| P(2)  | 12(1) | 10(1) | 14(1) | 3(1)  | 5(1)  | 5(1)  |
| N(1)  | 13(1) | 13(1) | 14(1) | 5(1)  | 5(1)  | 7(1)  |
| O(1)  | 14(1) | 17(1) | 25(1) | 6(1)  | 9(1)  | 5(1)  |
| O(1W) | 35(1) | 21(1) | 39(1) | 12(1) | 24(1) | 15(1) |
| O(2)  | 18(1) | 11(1) | 20(1) | 3(1)  | 7(1)  | 5(1)  |
| C(1)  | 13(1) | 12(1) | 12(1) | 5(1)  | 4(1)  | 7(1)  |
| C(2)  | 14(1) | 18(1) | 15(1) | 7(1)  | 7(1)  | 9(1)  |
| C(3)  | 16(1) | 20(1) | 14(1) | 5(1)  | 6(1)  | 12(1) |
| C(4)  | 16(1) | 13(1) | 12(1) | 3(1)  | 4(1)  | 8(1)  |
| C(5)  | 12(1) | 12(1) | 12(1) | 5(1)  | 4(1)  | 6(1)  |
| C(6)  | 15(1) | 12(1) | 15(1) | 3(1)  | 5(1)  | 6(1)  |
| C(7)  | 18(1) | 22(1) | 18(1) | 5(1)  | 5(1)  | 12(1) |
| C(8)  | 24(1) | 27(1) | 18(1) | 7(1)  | 2(1)  | 14(1) |
| C(9)  | 31(1) | 25(1) | 16(1) | 6(1)  | 9(1)  | 13(1) |
| C(10) | 31(1) | 35(1) | 23(1) | 10(1) | 16(1) | 20(1) |
| C(11) | 20(1) | 28(1) | 22(1) | 9(1)  | 9(1)  | 16(1) |
| C(12) | 18(1) | 15(1) | 14(1) | 7(1)  | 6(1)  | 9(1)  |
| C(13) | 23(1) | 14(1) | 29(1) | 5(1)  | 0(1)  | 7(1)  |
| C(14) | 36(1) | 14(1) | 34(1) | 6(1)  | 5(1)  | 15(1) |
| C(15) | 25(1) | 22(1) | 28(1) | 14(1) | 12(1) | 16(1) |
| C(16) | 17(1) | 21(1) | 26(1) | 10(1) | 4(1)  | 9(1)  |
| C(17) | 19(1) | 12(1) | 22(1) | 6(1)  | 4(1)  | 8(1)  |
| C(18) | 16(1) | 15(1) | 16(1) | 5(1)  | 8(1)  | 10(1) |
| C(19) | 20(1) | 24(1) | 19(1) | 7(1)  | 9(1)  | 5(1)  |
| C(20) | 24(1) | 31(1) | 16(1) | 4(1)  | 4(1)  | 7(1)  |
| C(21) | 34(1) | 33(1) | 19(1) | 13(1) | 14(1) | 20(1) |
| C(22) | 35(1) | 23(1) | 28(1) | 15(1) | 21(1) | 14(1) |
| C(23) | 25(1) | 15(1) | 22(1) | 6(1)  | 12(1) | 8(1)  |
| C(24) | 12(1) | 16(1) | 19(1) | 8(1)  | 8(1)  | 8(1)  |
| C(25) | 17(1) | 21(1) | 21(1) | 8(1)  | 7(1)  | 8(1)  |
| C(26) | 18(1) | 36(1) | 23(1) | 14(1) | 7(1)  | 14(1) |
| C(27) | 24(1) | 38(1) | 32(1) | 25(1) | 19(1) | 23(1) |
| C(28) | 27(1) | 24(1) | 32(1) | 14(1) | 18(1) | 19(1) |
| C(29) | 18(1) | 18(1) | 22(1) | 7(1)  | 10(1) | 10(1) |



**Table 5 Hydrogen coordinates (  $\times 10^4$ ) and isotropic displacement parameters ( $\text{\AA}^2 \times 10^3$ ) for PyPPO.**

|        | x     | y     | z     | U(eq) |
|--------|-------|-------|-------|-------|
| H(1WB) | 7626  | 7987  | 6504  | 34(7) |
| H(1WA) | 6602  | 7211  | 6930  | 55(9) |
| H(2A)  | 5436  | 5108  | 3613  | 18    |
| H(3A)  | 6650  | 7608  | 4438  | 19    |
| H(4A)  | 8908  | 9058  | 4199  | 17    |
| H(7A)  | 4027  | 3279  | 305   | 24    |
| H(8A)  | 3883  | 3289  | -1525 | 29    |
| H(9A)  | 5650  | 3065  | -2203 | 29    |
| H(10A) | 7620  | 2897  | -1029 | 32    |
| H(11A) | 7826  | 2963  | 827   | 26    |
| H(13A) | 5785  | 535   | 1743  | 30    |
| H(14A) | 7366  | -379  | 2342  | 35    |
| H(15A) | 9827  | 1131  | 3678  | 27    |
| H(16A) | 10691 | 3561  | 4456  | 26    |
| H(17A) | 9134  | 4499  | 3849  | 22    |
| H(19A) | 8461  | 6268  | 926   | 27    |
| H(20A) | 8127  | 6129  | -960  | 33    |
| H(21A) | 9834  | 7991  | -1389 | 31    |
| H(22A) | 11928 | 9974  | 67    | 31    |
| H(23A) | 12285 | 10135 | 1954  | 25    |
| H(25A) | 13374 | 9415  | 5042  | 24    |
| H(26A) | 14836 | 8431  | 5775  | 30    |
| H(27A) | 14215 | 6130  | 4803  | 30    |
| H(28A) | 12189 | 4820  | 3064  | 27    |
| H(29A) | 10748 | 5802  | 2292  | 22    |

**Table 6 Torsion angles [°] for PyPPO.**

---

|                       |             |                         |             |
|-----------------------|-------------|-------------------------|-------------|
| C(5)-N(1)-C(1)-C(2)   | -0.1(2)     | C(6)-P(1)-C(12)-C(13)   | -70.80(16)  |
| C(5)-N(1)-C(1)-P(1)   | 176.70(12)  | C(1)-P(1)-C(12)-C(13)   | 178.63(15)  |
| O(1)-P(1)-C(1)-N(1)   | -171.02(12) | C(17)-C(12)-C(13)-C(14) | -1.2(3)     |
| C(12)-P(1)-C(1)-N(1)  | 62.42(14)   | P(1)-C(12)-C(13)-C(14)  | 177.50(17)  |
| C(6)-P(1)-C(1)-N(1)   | -50.00(14)  | C(12)-C(13)-C(14)-C(15) | 0.4(3)      |
| O(1)-P(1)-C(1)-C(2)   | 5.86(17)    | C(13)-C(14)-C(15)-C(16) | 0.9(3)      |
| C(12)-P(1)-C(1)-C(2)  | -120.69(14) | C(14)-C(15)-C(16)-C(17) | -1.3(3)     |
| C(6)-P(1)-C(1)-C(2)   | 126.89(14)  | C(15)-C(16)-C(17)-C(12) | 0.5(3)      |
| N(1)-C(1)-C(2)-C(3)   | 0.5(3)      | C(13)-C(12)-C(17)-C(16) | 0.8(3)      |
| P(1)-C(1)-C(2)-C(3)   | -176.10(13) | P(1)-C(12)-C(17)-C(16)  | -177.84(14) |
| C(1)-C(2)-C(3)-C(4)   | -0.4(2)     | O(2)-P(2)-C(18)-C(19)   | -145.76(15) |
| C(2)-C(3)-C(4)-C(5)   | -0.2(2)     | C(24)-P(2)-C(18)-C(19)  | 89.05(17)   |
| C(1)-N(1)-C(5)-C(4)   | -0.5(2)     | C(5)-P(2)-C(18)-C(19)   | -23.48(18)  |
| C(1)-N(1)-C(5)-P(2)   | 177.05(12)  | O(2)-P(2)-C(18)-C(23)   | 33.51(16)   |
| C(3)-C(4)-C(5)-N(1)   | 0.7(3)      | C(24)-P(2)-C(18)-C(23)  | -91.68(15)  |
| C(3)-C(4)-C(5)-P(2)   | -176.80(13) | C(5)-P(2)-C(18)-C(23)   | 155.79(14)  |
| O(2)-P(2)-C(5)-N(1)   | -173.69(12) | C(23)-C(18)-C(19)-C(20) | -0.5(3)     |
| C(24)-P(2)-C(5)-N(1)  | -52.31(15)  | P(2)-C(18)-C(19)-C(20)  | 178.71(16)  |
| C(18)-P(2)-C(5)-N(1)  | 63.01(15)   | C(18)-C(19)-C(20)-C(21) | -0.2(3)     |
| O(2)-P(2)-C(5)-C(4)   | 3.97(16)    | C(19)-C(20)-C(21)-C(22) | 0.9(3)      |
| C(24)-P(2)-C(5)-C(4)  | 125.35(14)  | C(20)-C(21)-C(22)-C(23) | -0.9(3)     |
| C(18)-P(2)-C(5)-C(4)  | -119.33(14) | C(21)-C(22)-C(23)-C(18) | 0.2(3)      |
| O(1)-P(1)-C(6)-C(7)   | 38.38(16)   | C(19)-C(18)-C(23)-C(22) | 0.6(3)      |
| C(12)-P(1)-C(6)-C(7)  | 164.49(14)  | P(2)-C(18)-C(23)-C(22)  | -178.74(15) |
| C(1)-P(1)-C(6)-C(7)   | -82.01(15)  | O(2)-P(2)-C(24)-C(25)   | 11.10(16)   |
| O(1)-P(1)-C(6)-C(11)  | -143.74(15) | C(18)-P(2)-C(24)-C(25)  | 136.26(14)  |
| C(12)-P(1)-C(6)-C(11) | -17.63(17)  | C(5)-P(2)-C(24)-C(25)   | -109.15(14) |
| C(1)-P(1)-C(6)-C(11)  | 95.87(16)   | O(2)-P(2)-C(24)-C(29)   | -172.09(14) |
| C(11)-C(6)-C(7)-C(8)  | -1.0(3)     | C(18)-P(2)-C(24)-C(29)  | -46.92(16)  |
| P(1)-C(6)-C(7)-C(8)   | 176.92(14)  | C(5)-P(2)-C(24)-C(29)   | 67.66(16)   |
| C(6)-C(7)-C(8)-C(9)   | 1.5(3)      | C(29)-C(24)-C(25)-C(26) | -0.3(3)     |
| C(7)-C(8)-C(9)-C(10)  | -0.9(3)     | P(2)-C(24)-C(25)-C(26)  | 176.60(14)  |
| C(8)-C(9)-C(10)-C(11) | -0.2(3)     | C(24)-C(25)-C(26)-C(27) | -0.9(3)     |
| C(9)-C(10)-C(11)-C(6) | 0.7(3)      | C(25)-C(26)-C(27)-C(28) | 1.2(3)      |
| C(7)-C(6)-C(11)-C(10) | -0.1(3)     | C(26)-C(27)-C(28)-C(29) | -0.4(3)     |
| P(1)-C(6)-C(11)-C(10) | -177.92(15) | C(27)-C(28)-C(29)-C(24) | -0.8(3)     |
| O(1)-P(1)-C(12)-C(17) | -127.42(15) | C(25)-C(24)-C(29)-C(28) | 1.1(3)      |
| C(6)-P(1)-C(12)-C(17) | 107.83(16)  | P(2)-C(24)-C(29)-C(28)  | -175.61(14) |
| C(1)-P(1)-C(12)-C(17) | -2.75(18)   |                         |             |
| O(1)-P(1)-C(12)-C(13) | 53.95(17)   |                         |             |

---

Symmetry transformations used to generate equivalent atoms:

**Table 7 Hydrogen bonds for PyPPO [Å and °].**

| D-H...A               | d(D-H) | d(H...A) | d(D...A) | <(DHA) |
|-----------------------|--------|----------|----------|--------|
| O(1W)-H(1WB)...O(2)#1 | 0.83   | 2.14     | 2.955(2) | 172    |
| O(1W)-H(1WA)...O(1)#2 | 0.88   | 1.89     | 2.763(2) | 173    |

Symmetry transformations used to generate equivalent atoms:

#1 -x+2,-y+2,-z+1      #2 -x+1,-y+1,-z+1

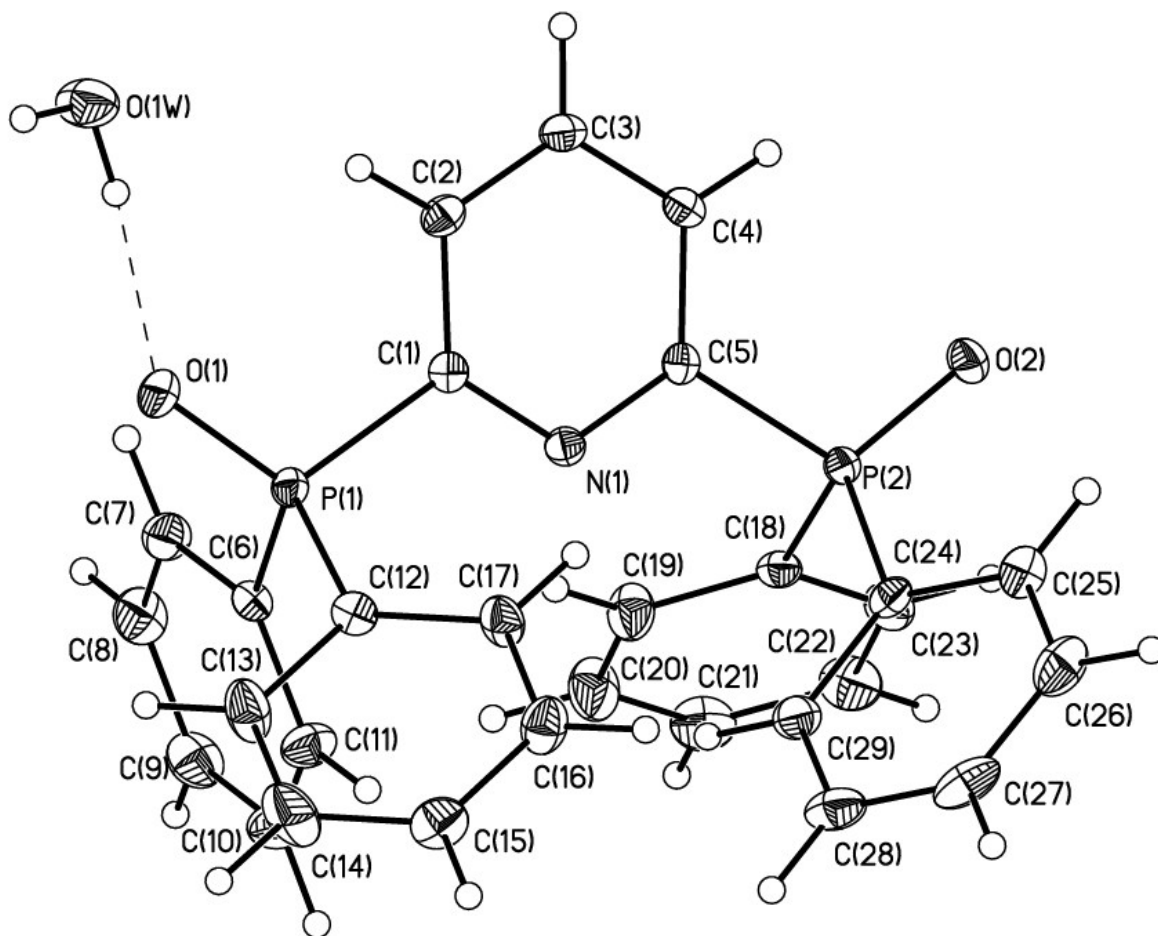

**Figure 1** General view of the unit cell independent part of PyPPO structure with the representation of intermolecular O(1W)-H...O(1) hydrogen bond by a dash line. Non-hydrogen atoms are represented as probability ellipsoids of atomic displacements ( $p=0.5$ ).

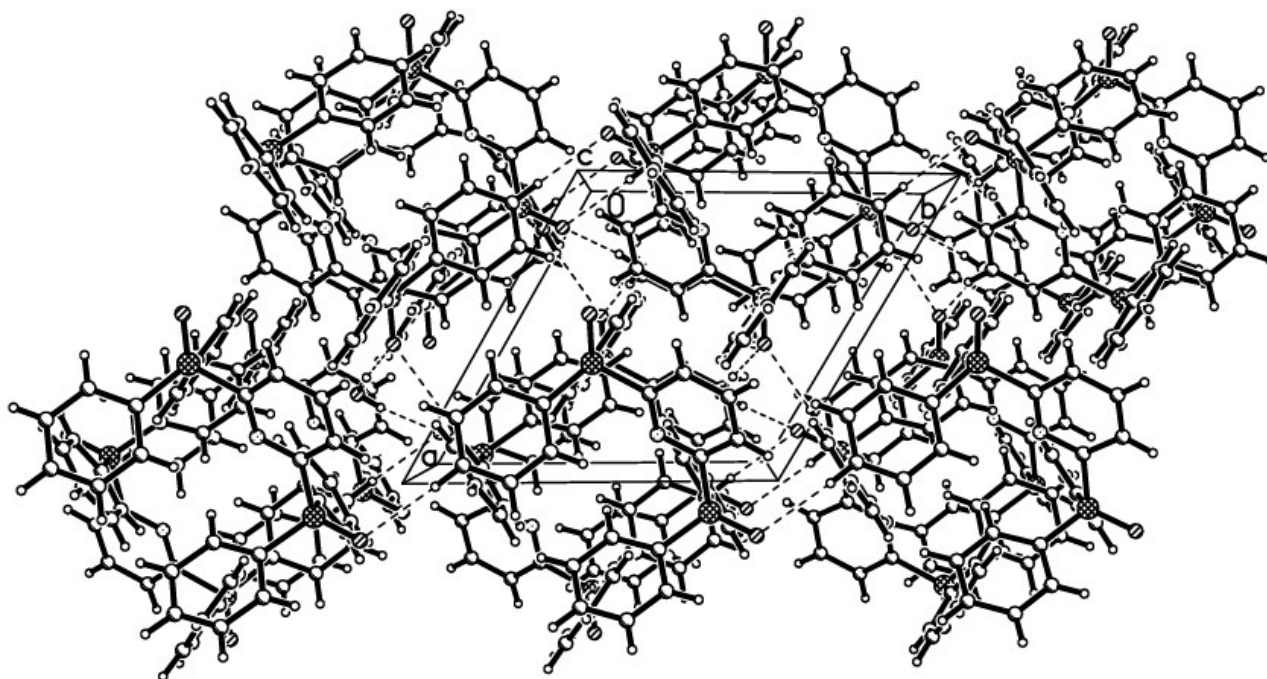

Figure 2 A fragment of PyPPO crystal packing along the *ab* plane of the unit cell.

## DPPO Structure

**Table 8 Crystal data and structure refinement for DPPO.**

|                                   |                                                                              |                    |
|-----------------------------------|------------------------------------------------------------------------------|--------------------|
| Identification code               | a                                                                            |                    |
| Empirical formula                 | C <sub>42</sub> H <sub>42</sub> N <sub>2</sub> O <sub>6</sub> P <sub>2</sub> |                    |
| Formula weight                    | 732.71                                                                       |                    |
| Temperature                       | 120(2) K                                                                     |                    |
| Wavelength                        | 0.71073 Å                                                                    |                    |
| Crystal system                    | Monoclinic                                                                   |                    |
| Space group                       | P2 <sub>1</sub> /c                                                           |                    |
| Unit cell dimensions              | a = 8.6373(6) Å                                                              | α = 90°.           |
|                                   | b = 20.0602(14) Å                                                            | β = 106.8510(16)°. |
|                                   | c = 11.4415(8) Å                                                             | γ = 90°.           |
| Volume                            | 1897.3(2) Å <sup>3</sup>                                                     |                    |
| Z                                 | 2                                                                            |                    |
| Density (calculated)              | 1.283 Mg/m <sup>3</sup>                                                      |                    |
| Absorption coefficient            | 0.165 mm <sup>-1</sup>                                                       |                    |
| F(000)                            | 772                                                                          |                    |
| Crystal size                      | 0.240 x 0.210 x 0.160 mm <sup>3</sup>                                        |                    |
| Theta range for data collection   | 2.030 to 27.999°.                                                            |                    |
| Index ranges                      | -11 ≤ h ≤ 11, -26 ≤ k ≤ 26, -15 ≤ l ≤ 15                                     |                    |
| Reflections collected             | 21684                                                                        |                    |
| Independent reflections           | 4582 [R(int) = 0.0589]                                                       |                    |
| Completeness to theta = 25.242°   | 100.0 %                                                                      |                    |
| Absorption correction             | Semi-empirical from equivalents                                              |                    |
| Max. and min. transmission        | 0.988 and 0.950                                                              |                    |
| Refinement method                 | Full-matrix least-squares on F <sup>2</sup>                                  |                    |
| Data / restraints / parameters    | 4582 / 12 / 254                                                              |                    |
| Goodness-of-fit on F <sup>2</sup> | 1.045                                                                        |                    |
| Final R indices [I > 2σ(I)]       | R1 = 0.0582, wR2 = 0.1442                                                    |                    |
| R indices (all data)              | R1 = 0.0793, wR2 = 0.1608                                                    |                    |
| Extinction coefficient            | n/a                                                                          |                    |
| Largest diff. peak and hole       | 0.686 and -0.420 e. Å <sup>-3</sup>                                          |                    |

**Table 9 Atomic coordinates (  $\times 10^4$ ) and equivalent isotropic displacement parameters ( $\text{\AA}^2 \times 10^3$ ) for DPPO. U(eq) is defined as one third of the trace of the orthogonalized  $U^{ij}$  tensor.**

|        | x        | y        | z        | U(eq) |
|--------|----------|----------|----------|-------|
| P(1)   | 1482(1)  | 5977(1)  | 3686(1)  | 14(1) |
| O(1)   | 960(2)   | 5951(1)  | 4815(1)  | 19(1) |
| N(1)   | 671(2)   | 5396(1)  | 1467(2)  | 16(1) |
| C(1)   | 485(2)   | 5341(1)  | 2591(2)  | 16(1) |
| C(2)   | -461(3)  | 4856(1)  | 2918(2)  | 18(1) |
| C(3)   | -1268(3) | 4408(1)  | 2022(2)  | 23(1) |
| C(4)   | -1104(3) | 4457(1)  | 854(2)   | 22(1) |
| C(5)   | -112(2)  | 4960(1)  | 618(2)   | 16(1) |
| C(6)   | 936(2)   | 6748(1)  | 2852(2)  | 16(1) |
| C(7)   | 1679(3)  | 6968(1)  | 1986(2)  | 23(1) |
| C(8)   | 1161(3)  | 7554(1)  | 1348(2)  | 26(1) |
| C(9)   | -89(3)   | 7918(1)  | 1562(2)  | 28(1) |
| C(10)  | -822(3)  | 7704(1)  | 2418(2)  | 31(1) |
| C(11)  | -314(3)  | 7118(1)  | 3066(2)  | 23(1) |
| C(12)  | 3634(3)  | 5872(1)  | 3987(2)  | 17(1) |
| C(13)  | 4386(3)  | 5726(1)  | 3090(2)  | 22(1) |
| C(14)  | 6064(3)  | 5683(1)  | 3402(2)  | 27(1) |
| C(15)  | 6991(3)  | 5780(1)  | 4598(2)  | 26(1) |
| C(16)  | 6250(3)  | 5915(1)  | 5491(2)  | 27(1) |
| C(17)  | 4572(3)  | 5962(1)  | 5195(2)  | 22(1) |
| O(1S)  | 4586(13) | 8656(7)  | 4981(19) | 64(2) |
| O(2S)  | 6901(5)  | 7855(2)  | 4235(4)  | 61(1) |
| C(1S)  | 6282(8)  | 8743(4)  | 5423(7)  | 66(2) |
| C(2S)  | 7239(8)  | 8528(3)  | 4601(7)  | 67(2) |
| C(3S)  | 5166(11) | 7752(7)  | 3687(11) | 82(2) |
| C(4S)  | 4660(20) | 7957(11) | 4765(17) | 82(4) |
| O(1S') | 4760(20) | 8533(10) | 5250(30) | 64(2) |
| O(2S') | 6329(7)  | 8354(3)  | 3533(6)  | 61(1) |
| C(1S') | 5728(14) | 9062(5)  | 5042(9)  | 66(2) |
| C(2S') | 6094(12) | 9014(4)  | 3882(9)  | 67(2) |
| C(3S') | 5570(20) | 7822(9)  | 3995(15) | 82(2) |
| C(4S') | 4230(30) | 7949(16) | 4540(30) | 82(4) |

**Table 10 Bond lengths [Å] and angles [°] for DPPO.**

|              |            |                  |            |
|--------------|------------|------------------|------------|
| P(1)-O(1)    | 1.4877(15) | O(1S')-C(1S')    | 1.410(9)   |
| P(1)-C(12)   | 1.802(2)   | O(1S')-C(4S')    | 1.425(10)  |
| P(1)-C(6)    | 1.807(2)   | O(2S')-C(2S')    | 1.413(8)   |
| P(1)-C(1)    | 1.820(2)   | O(2S')-C(3S')    | 1.433(10)  |
| N(1)-C(5)    | 1.337(3)   | C(1S')-C(2S')    | 1.454(8)   |
| N(1)-C(1)    | 1.346(3)   | C(1S')-H(1SC)    | 0.9900     |
| C(1)-C(2)    | 1.390(3)   | C(1S')-H(1SD)    | 0.9900     |
| C(2)-C(3)    | 1.389(3)   | C(2S')-H(2SC)    | 0.9900     |
| C(2)-H(2A)   | 0.9500     | C(2S')-H(2SD)    | 0.9900     |
| C(3)-C(4)    | 1.388(3)   | C(3S')-C(4S')    | 1.489(10)  |
| C(3)-H(3A)   | 0.9500     | C(3S')-H(3SC)    | 0.9900     |
| C(4)-C(5)    | 1.399(3)   | C(3S')-H(3SD)    | 0.9900     |
| C(4)-H(4A)   | 0.9500     | C(4S')-H(4SB)    | 0.9900     |
| C(5)-C(5)#1  | 1.490(4)   | C(4S')-H(4SC)    | 0.9900     |
| C(6)-C(11)   | 1.390(3)   |                  |            |
| C(6)-C(7)    | 1.399(3)   | O(1)-P(1)-C(12)  | 112.64(10) |
| C(7)-C(8)    | 1.387(3)   | O(1)-P(1)-C(6)   | 113.01(9)  |
| C(7)-H(7A)   | 0.9500     | C(12)-P(1)-C(6)  | 107.31(10) |
| C(8)-C(9)    | 1.384(3)   | O(1)-P(1)-C(1)   | 111.74(9)  |
| C(8)-H(8A)   | 0.9500     | C(12)-P(1)-C(1)  | 107.84(9)  |
| C(9)-C(10)   | 1.380(4)   | C(6)-P(1)-C(1)   | 103.76(10) |
| C(9)-H(9A)   | 0.9500     | C(5)-N(1)-C(1)   | 117.71(18) |
| C(10)-C(11)  | 1.391(3)   | N(1)-C(1)-C(2)   | 123.86(19) |
| C(10)-H(10A) | 0.9500     | N(1)-C(1)-P(1)   | 115.84(15) |
| C(11)-H(11A) | 0.9500     | C(2)-C(1)-P(1)   | 120.23(16) |
| C(12)-C(13)  | 1.396(3)   | C(3)-C(2)-C(1)   | 117.6(2)   |
| C(12)-C(17)  | 1.396(3)   | C(3)-C(2)-H(2A)  | 121.2      |
| C(13)-C(14)  | 1.391(3)   | C(1)-C(2)-H(2A)  | 121.2      |
| C(13)-H(13A) | 0.9500     | C(4)-C(3)-C(2)   | 119.7(2)   |
| C(14)-C(15)  | 1.384(4)   | C(4)-C(3)-H(3A)  | 120.2      |
| C(14)-H(14A) | 0.9500     | C(2)-C(3)-H(3A)  | 120.2      |
| C(15)-C(16)  | 1.381(4)   | C(3)-C(4)-C(5)   | 118.4(2)   |
| C(15)-H(15A) | 0.9500     | C(3)-C(4)-H(4A)  | 120.8      |
| C(16)-C(17)  | 1.393(3)   | C(5)-C(4)-H(4A)  | 120.8      |
| C(16)-H(16A) | 0.9500     | N(1)-C(5)-C(4)   | 122.74(19) |
| C(17)-H(17A) | 0.9500     | N(1)-C(5)-C(5)#1 | 116.2(2)   |
| O(1S)-C(1S)  | 1.415(9)   | C(4)-C(5)-C(5)#1 | 121.1(2)   |
| O(1S)-C(4S)  | 1.428(9)   | C(11)-C(6)-C(7)  | 119.7(2)   |
| O(2S)-C(2S)  | 1.419(6)   | C(11)-C(6)-P(1)  | 117.46(16) |
| O(2S)-C(3S)  | 1.462(8)   | C(7)-C(6)-P(1)   | 122.78(16) |
| C(1S)-C(2S)  | 1.484(7)   | C(8)-C(7)-C(6)   | 119.7(2)   |
| C(1S)-H(1SA) | 0.9900     | C(8)-C(7)-H(7A)  | 120.1      |
| C(1S)-H(1SB) | 0.9900     | C(6)-C(7)-H(7A)  | 120.1      |
| C(2S)-H(2SA) | 0.9900     | C(9)-C(8)-C(7)   | 120.3(2)   |
| C(2S)-H(2SB) | 0.9900     | C(9)-C(8)-H(8A)  | 119.9      |
| C(3S)-C(4S)  | 1.480(9)   | C(7)-C(8)-H(8A)  | 119.9      |
| C(3S)-H(3SA) | 0.9900     | C(10)-C(9)-C(8)  | 120.2(2)   |
| C(3S)-H(3SB) | 0.9900     | C(10)-C(9)-H(9A) | 119.9      |
| C(4S)-H(4SA) | 0.9900     | C(8)-C(9)-H(9A)  | 119.9      |
| C(4S)-H(4SD) | 0.9900     | C(9)-C(10)-C(11) | 120.1(2)   |



|                     |            |                      |           |
|---------------------|------------|----------------------|-----------|
| C(9)-C(10)-H(10A)   | 119.9      | O(2S)-C(3S)-H(3SA)   | 112.4     |
| C(11)-C(10)-H(10A)  | 119.9      | C(4S)-C(3S)-H(3SA)   | 112.4     |
| C(6)-C(11)-C(10)    | 119.9(2)   | O(2S)-C(3S)-H(3SB)   | 112.4     |
| C(6)-C(11)-H(11A)   | 120.0      | C(4S)-C(3S)-H(3SB)   | 112.4     |
| C(10)-C(11)-H(11A)  | 120.0      | H(3SA)-C(3S)-H(3SB)  | 110.0     |
| C(13)-C(12)-C(17)   | 119.6(2)   | O(1S)-C(4S)-C(3S)    | 117(2)    |
| C(13)-C(12)-P(1)    | 123.90(17) | O(1S)-C(4S)-H(4SA)   | 108.0     |
| C(17)-C(12)-P(1)    | 116.44(17) | C(3S)-C(4S)-H(4SA)   | 108.0     |
| C(14)-C(13)-C(12)   | 119.8(2)   | O(1S)-C(4S)-H(4SD)   | 108.0     |
| C(14)-C(13)-H(13A)  | 120.1      | C(3S)-C(4S)-H(4SD)   | 108.0     |
| C(12)-C(13)-H(13A)  | 120.1      | H(4SA)-C(4S)-H(4SD)  | 107.2     |
| C(15)-C(14)-C(13)   | 120.4(2)   | C(1S')-O(1S')-C(4S') | 129(3)    |
| C(15)-C(14)-H(14A)  | 119.8      | C(2S')-O(2S')-C(3S') | 118.4(10) |
| C(13)-C(14)-H(14A)  | 119.8      | O(1S')-C(1S')-C(2S') | 113.4(16) |
| C(16)-C(15)-C(14)   | 120.0(2)   | O(1S')-C(1S')-H(1SC) | 108.9     |
| C(16)-C(15)-H(15A)  | 120.0      | C(2S')-C(1S')-H(1SC) | 108.9     |
| C(14)-C(15)-H(15A)  | 120.0      | O(1S')-C(1S')-H(1SD) | 108.9     |
| C(15)-C(16)-C(17)   | 120.4(2)   | C(2S')-C(1S')-H(1SD) | 108.9     |
| C(15)-C(16)-H(16A)  | 119.8      | H(1SC)-C(1S')-H(1SD) | 107.7     |
| C(17)-C(16)-H(16A)  | 119.8      | O(2S')-C(2S')-C(1S') | 114.0(8)  |
| C(16)-C(17)-C(12)   | 119.8(2)   | O(2S')-C(2S')-H(2SC) | 108.7     |
| C(16)-C(17)-H(17A)  | 120.1      | C(1S')-C(2S')-H(2SC) | 108.7     |
| C(12)-C(17)-H(17A)  | 120.1      | O(2S')-C(2S')-H(2SD) | 108.7     |
| C(1S)-O(1S)-C(4S)   | 95.0(13)   | C(1S')-C(2S')-H(2SD) | 108.7     |
| C(2S)-O(2S)-C(3S)   | 111.1(7)   | H(2SC)-C(2S')-H(2SD) | 107.6     |
| O(1S)-C(1S)-C(2S)   | 116.5(12)  | O(2S')-C(3S')-C(4S') | 121(2)    |
| O(1S)-C(1S)-H(1SA)  | 108.2      | O(2S')-C(3S')-H(3SC) | 107.0     |
| C(2S)-C(1S)-H(1SA)  | 108.2      | C(4S')-C(3S')-H(3SC) | 107.0     |
| O(1S)-C(1S)-H(1SB)  | 108.2      | O(2S')-C(3S')-H(3SD) | 107.0     |
| C(2S)-C(1S)-H(1SB)  | 108.2      | C(4S')-C(3S')-H(3SD) | 107.0     |
| H(1SA)-C(1S)-H(1SB) | 107.3      | H(3SC)-C(3S')-H(3SD) | 106.7     |
| O(2S)-C(2S)-C(1S)   | 111.0(5)   | O(1S')-C(4S')-C(3S') | 102(3)    |
| O(2S)-C(2S)-H(2SA)  | 109.4      | O(1S')-C(4S')-H(4SB) | 111.3     |
| C(1S)-C(2S)-H(2SA)  | 109.4      | C(3S')-C(4S')-H(4SB) | 111.3     |
| O(2S)-C(2S)-H(2SB)  | 109.4      | O(1S')-C(4S')-H(4SC) | 111.3     |
| C(1S)-C(2S)-H(2SB)  | 109.4      | C(3S')-C(4S')-H(4SC) | 111.3     |
| H(2SA)-C(2S)-H(2SB) | 108.0      | H(4SB)-C(4S')-H(4SC) | 109.2     |
| O(2S)-C(3S)-C(4S)   | 96.6(10)   |                      |           |

---

Symmetry transformations used to generate equivalent atoms:

#1 -x,-y+1,-z

**Table 11** Anisotropic displacement parameters ( $\text{\AA}^2 \times 10^3$ ) for DPPO. The anisotropic displacement factor exponent takes the form:  $-2\pi^2 [h^2 a^{*2} U^{11} + \dots + 2 h k a^* b^* U^{12}]$

|        | U <sup>11</sup> | U <sup>22</sup> | U <sup>33</sup> | U <sup>23</sup> | U <sup>13</sup> | U <sup>12</sup> |
|--------|-----------------|-----------------|-----------------|-----------------|-----------------|-----------------|
| P(1)   | 16(1)           | 15(1)           | 14(1)           | 0(1)            | 5(1)            | 0(1)            |
| O(1)   | 21(1)           | 20(1)           | 17(1)           | 1(1)            | 8(1)            | -1(1)           |
| N(1)   | 18(1)           | 15(1)           | 16(1)           | 0(1)            | 6(1)            | 0(1)            |
| C(1)   | 15(1)           | 16(1)           | 16(1)           | 2(1)            | 4(1)            | 2(1)            |
| C(2)   | 22(1)           | 18(1)           | 17(1)           | 2(1)            | 8(1)            | 1(1)            |
| C(3)   | 28(1)           | 20(1)           | 24(1)           | 2(1)            | 11(1)           | -8(1)           |
| C(4)   | 28(1)           | 20(1)           | 18(1)           | -3(1)           | 8(1)            | -7(1)           |
| C(5)   | 18(1)           | 15(1)           | 17(1)           | 1(1)            | 6(1)            | 1(1)            |
| C(6)   | 18(1)           | 16(1)           | 15(1)           | 0(1)            | 3(1)            | -1(1)           |
| C(7)   | 25(1)           | 22(1)           | 24(1)           | 3(1)            | 11(1)           | 2(1)            |
| C(8)   | 31(1)           | 25(1)           | 24(1)           | 6(1)            | 10(1)           | -1(1)           |
| C(9)   | 36(1)           | 20(1)           | 28(1)           | 6(1)            | 8(1)            | 5(1)            |
| C(10)  | 35(1)           | 27(1)           | 35(1)           | 5(1)            | 15(1)           | 14(1)           |
| C(11)  | 26(1)           | 23(1)           | 23(1)           | 3(1)            | 12(1)           | 4(1)            |
| C(12)  | 17(1)           | 14(1)           | 20(1)           | 2(1)            | 6(1)            | 0(1)            |
| C(13)  | 21(1)           | 26(1)           | 21(1)           | 0(1)            | 6(1)            | 3(1)            |
| C(14)  | 22(1)           | 31(1)           | 31(1)           | 2(1)            | 13(1)           | 4(1)            |
| C(15)  | 16(1)           | 25(1)           | 37(1)           | 2(1)            | 6(1)            | 0(1)            |
| C(16)  | 22(1)           | 29(1)           | 26(1)           | 0(1)            | 1(1)            | -3(1)           |
| C(17)  | 22(1)           | 22(1)           | 20(1)           | 0(1)            | 5(1)            | -2(1)           |
| O(1S)  | 57(3)           | 53(5)           | 89(9)           | 4(4)            | 32(3)           | 20(3)           |
| O(2S)  | 46(2)           | 77(3)           | 68(3)           | -30(2)          | 31(2)           | -9(2)           |
| C(1S)  | 61(4)           | 65(5)           | 72(5)           | -26(4)          | 16(3)           | 2(3)            |
| C(2S)  | 54(3)           | 71(4)           | 86(4)           | -31(3)          | 36(3)           | -31(3)          |
| C(3S)  | 36(6)           | 93(4)           | 119(8)          | -69(5)          | 24(5)           | -40(4)          |
| C(4S)  | 100(10)         | 58(3)           | 113(8)          | -11(5)          | 69(7)           | -18(6)          |
| O(1S') | 57(3)           | 53(5)           | 89(9)           | 4(4)            | 32(3)           | 20(3)           |
| O(2S') | 46(2)           | 77(3)           | 68(3)           | -30(2)          | 31(2)           | -9(2)           |
| C(1S') | 61(4)           | 65(5)           | 72(5)           | -26(4)          | 16(3)           | 2(3)            |
| C(2S') | 54(3)           | 71(4)           | 86(4)           | -31(3)          | 36(3)           | -31(3)          |
| C(3S') | 36(6)           | 93(4)           | 119(8)          | -69(5)          | 24(5)           | -40(4)          |
| C(4S') | 100(10)         | 58(3)           | 113(8)          | -11(5)          | 69(7)           | -18(6)          |

**Table 12** Hydrogen coordinates ( $\times 10^4$ ) and isotropic displacement parameters ( $\text{\AA}^2 \times 10^3$ ) for DPPO.

|        | x     | y    | z    | U(eq) |
|--------|-------|------|------|-------|
| H(2A)  | -552  | 4831 | 3725 | 22    |
| H(3A)  | -1930 | 4070 | 2208 | 27    |
| H(4A)  | -1652 | 4156 | 229  | 26    |
| H(7A)  | 2535  | 6718 | 1836 | 28    |
| H(8A)  | 1666  | 7705 | 761  | 31    |
| H(9A)  | -444  | 8318 | 1119 | 34    |
| H(10A) | -1676 | 7958 | 2566 | 38    |
| H(11A) | -822  | 6971 | 3654 | 27    |
| H(13A) | 3754  | 5656 | 2269 | 27    |
| H(14A) | 6576  | 5587 | 2790 | 32    |
| H(15A) | 8137  | 5753 | 4804 | 32    |
| H(16A) | 6889  | 5977 | 6313 | 32    |
| H(17A) | 4068  | 6056 | 5812 | 26    |
| H(1SA) | 6679  | 8494 | 6200 | 80    |
| H(1SB) | 6504  | 9221 | 5612 | 80    |
| H(2SA) | 6979  | 8818 | 3870 | 80    |
| H(2SB) | 8407  | 8576 | 5029 | 80    |
| H(3SA) | 4896  | 7280 | 3460 | 99    |
| H(3SB) | 4712  | 8044 | 2972 | 99    |
| H(4SA) | 3582  | 7765 | 4684 | 99    |
| H(4SD) | 5425  | 7755 | 5498 | 99    |
| H(1SC) | 6756  | 9070 | 5711 | 80    |
| H(1SD) | 5161  | 9488 | 5066 | 80    |
| H(2SC) | 5196  | 9217 | 3238 | 80    |
| H(2SD) | 7084  | 9275 | 3935 | 80    |
| H(3SC) | 6430  | 7588 | 4622 | 99    |
| H(3SD) | 5155  | 7503 | 3315 | 99    |
| H(4SB) | 3192  | 8029 | 3898 | 99    |
| H(4SC) | 4087  | 7571 | 5057 | 99    |

**Table 13** Torsion angles [°] for DPPO.

|                       |             |                             |             |
|-----------------------|-------------|-----------------------------|-------------|
| C(5)-N(1)-C(1)-C(2)   | 0.4(3)      | P(1)-C(6)-C(11)-C(10)       | -177.79(19) |
| C(5)-N(1)-C(1)-P(1)   | -176.57(15) | C(9)-C(10)-C(11)-C(6)       | 0.1(4)      |
| O(1)-P(1)-C(1)-N(1)   | 169.28(14)  | O(1)-P(1)-C(12)-C(13)       | 164.79(18)  |
| C(12)-P(1)-C(1)-N(1)  | -66.40(17)  | C(6)-P(1)-C(12)-C(13)       | -70.2(2)    |
| C(6)-P(1)-C(1)-N(1)   | 47.22(17)   | C(1)-P(1)-C(12)-C(13)       | 41.0(2)     |
| O(1)-P(1)-C(1)-C(2)   | -7.8(2)     | O(1)-P(1)-C(12)-C(17)       | -16.8(2)    |
| C(12)-P(1)-C(1)-C(2)  | 116.48(18)  | C(6)-P(1)-C(12)-C(17)       | 108.20(18)  |
| C(6)-P(1)-C(1)-C(2)   | -129.90(17) | C(1)-P(1)-C(12)-C(17)       | -140.57(17) |
| N(1)-C(1)-C(2)-C(3)   | -0.6(3)     | C(17)-C(12)-C(13)-C(14)     | -1.2(3)     |
| P(1)-C(1)-C(2)-C(3)   | 176.27(17)  | P(1)-C(12)-C(13)-C(14)      | 177.17(18)  |
| C(1)-C(2)-C(3)-C(4)   | 0.2(3)      | C(12)-C(13)-C(14)-C(15)     | 0.5(4)      |
| C(2)-C(3)-C(4)-C(5)   | 0.3(3)      | C(13)-C(14)-C(15)-C(16)     | 0.5(4)      |
| C(1)-N(1)-C(5)-C(4)   | 0.2(3)      | C(14)-C(15)-C(16)-C(17)     | -0.7(4)     |
| C(1)-N(1)-C(5)-C(5)#1 | 179.5(2)    | C(15)-C(16)-C(17)-C(12)     | 0.0(4)      |
| C(3)-C(4)-C(5)-N(1)   | -0.5(3)     | C(13)-C(12)-C(17)-C(16)     | 1.0(3)      |
| C(3)-C(4)-C(5)-C(5)#1 | -179.9(2)   | P(1)-C(12)-C(17)-C(16)      | -177.52(18) |
| O(1)-P(1)-C(6)-C(11)  | -21.3(2)    | C(4S)-O(1S)-C(1S)-C(2S)     | 56.2(14)    |
| C(12)-P(1)-C(6)-C(11) | -146.05(18) | C(3S)-O(2S)-C(2S)-C(1S)     | 54.5(10)    |
| C(1)-P(1)-C(6)-C(11)  | 99.95(18)   | O(1S)-C(1S)-C(2S)-O(2S)     | -54.4(11)   |
| O(1)-P(1)-C(6)-C(7)   | 160.93(18)  | C(2S)-O(2S)-C(3S)-C(4S)     | -59.7(12)   |
| C(12)-P(1)-C(6)-C(7)  | 36.2(2)     | C(1S)-O(1S)-C(4S)-C(3S)     | -74.9(15)   |
| C(1)-P(1)-C(6)-C(7)   | -77.8(2)    | O(2S)-C(3S)-C(4S)-O(1S)     | 78.8(14)    |
| C(11)-C(6)-C(7)-C(8)  | 0.0(3)      | C(4S')-O(1S')-C(1S')-C(2S') | 5(2)        |
| P(1)-C(6)-C(7)-C(8)   | 177.70(18)  | C(3S')-O(2S')-C(2S')-C(1S') | 25.7(13)    |
| C(6)-C(7)-C(8)-C(9)   | -0.2(4)     | O(1S')-C(1S')-C(2S')-O(2S') | -35.9(15)   |
| C(7)-C(8)-C(9)-C(10)  | 0.4(4)      | C(2S')-O(2S')-C(3S')-C(4S') | 16(2)       |
| C(8)-C(9)-C(10)-C(11) | -0.4(4)     | C(1S')-O(1S')-C(4S')-C(3S') | 31(3)       |
| C(7)-C(6)-C(11)-C(10) | 0.1(4)      | O(2S')-C(3S')-C(4S')-O(1S') | -42(3)      |

Symmetry transformations used to generate equivalent atoms:

#1 -x,-y+1,-z

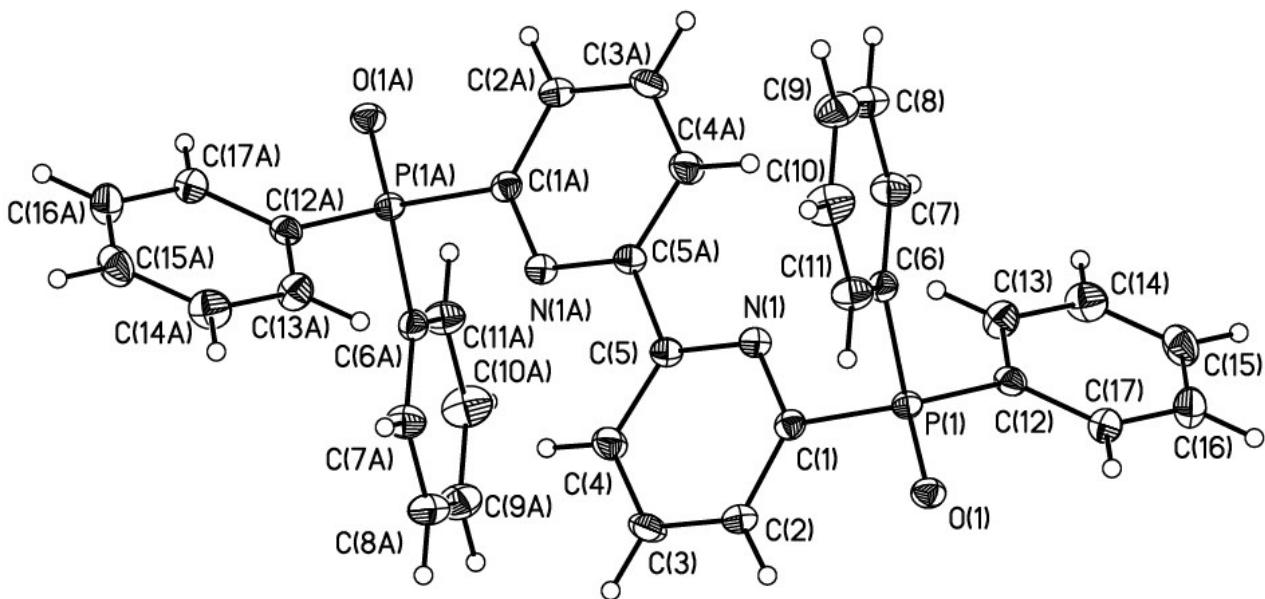

**Figure 3** General view of the DPPO structure in crystal. Non-hydrogen atoms are represented as probability ellipsoids of atomic vibrations ( $p=0.5$ ).

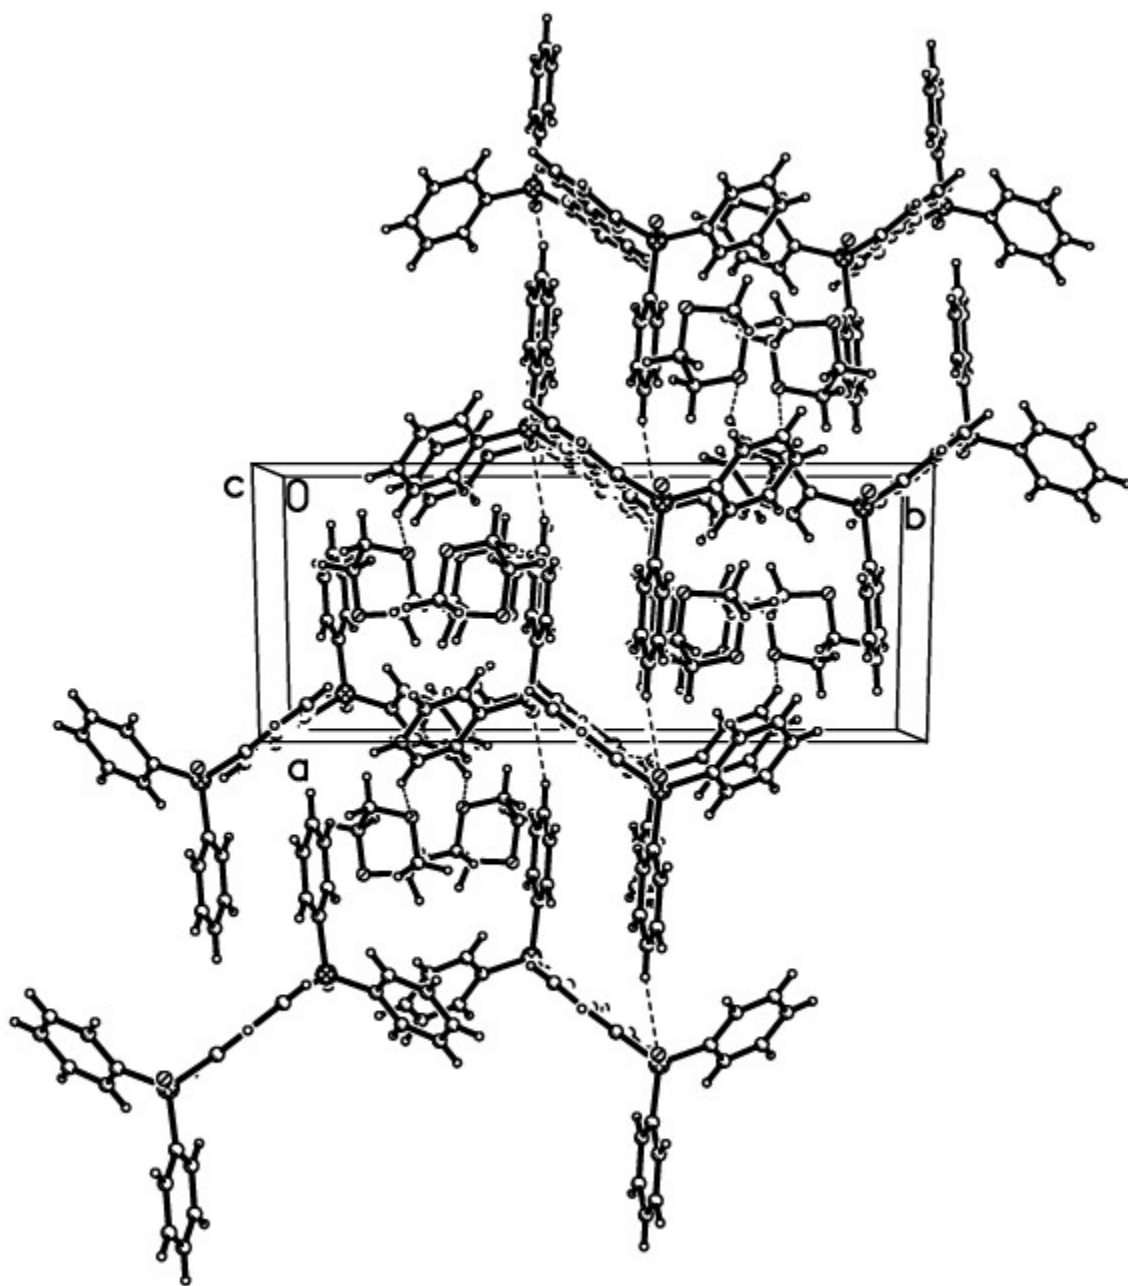

Figure 4 A fragment of DPPO crystal packing along the *ab* plane of the unit cell.

## Structure of 9-diphenylphosphinoylphenanthrolinona-2

Table 14 Crystal data and structure refinement for PO-1.

|                                   |                                                                 |                  |
|-----------------------------------|-----------------------------------------------------------------|------------------|
| Identification code               | a                                                               |                  |
| Empirical formula                 | C <sub>24</sub> H <sub>17</sub> N <sub>2</sub> O <sub>2</sub> P |                  |
| Formula weight                    | 396.36                                                          |                  |
| Temperature                       | 120(2) K                                                        |                  |
| Wavelength                        | 0.71073 Å                                                       |                  |
| Crystal system                    | Triclinic                                                       |                  |
| Space group                       | P-1                                                             |                  |
| Unit cell dimensions              | a = 8.100(3) Å                                                  | α = 90.29(3)°.   |
|                                   | b = 10.175(3) Å                                                 | β = 104.27(3)°.  |
|                                   | c = 11.792(2) Å                                                 | γ = 91.442(19)°. |
| Volume                            | 941.5(5) Å <sup>3</sup>                                         |                  |
| Z                                 | 2                                                               |                  |
| Density (calculated)              | 1.398 Mg/m <sup>3</sup>                                         |                  |
| Absorption coefficient            | 0.170 mm <sup>-1</sup>                                          |                  |
| F(000)                            | 412                                                             |                  |
| Crystal size                      | 0.160 x 0.130 x 0.080 mm <sup>3</sup>                           |                  |
| Theta range for data collection   | 2.002 to 28.997°.                                               |                  |
| Index ranges                      | -11 ≤ h ≤ 11, -13 ≤ k ≤ 13, -16 ≤ l ≤ 16                        |                  |
| Reflections collected             | 10451                                                           |                  |
| Independent reflections           | 4941 [R(int) = 0.0710]                                          |                  |
| Completeness to theta = 25.242°   | 99.8 %                                                          |                  |
| Absorption correction             | Semi-empirical from equivalents                                 |                  |
| Max. and min. transmission        | 0.995 and 0.961                                                 |                  |
| Refinement method                 | Full-matrix least-squares on F <sup>2</sup>                     |                  |
| Data / restraints / parameters    | 4941 / 0 / 330                                                  |                  |
| Goodness-of-fit on F <sup>2</sup> | 0.971                                                           |                  |
| Final R indices [I > 2σ(I)]       | R1 = 0.0639, wR2 = 0.1116                                       |                  |
| R indices (all data)              | R1 = 0.1302, wR2 = 0.1390                                       |                  |
| Extinction coefficient            | n/a                                                             |                  |
| Largest diff. peak and hole       | 0.472 and -0.513 e. Å <sup>-3</sup>                             |                  |

**Table 15 Atomic coordinates ( $\times 10^4$ ) and equivalent isotropic displacement parameters ( $\text{\AA}^2 \times 10^3$ ) for PO-1.  $U(\text{eq})$  is defined as one third of the trace of the orthogonalized  $U_{ij}$  tensor.**

|       | x        | y       | z       | U(eq) |
|-------|----------|---------|---------|-------|
| P(1)  | 155(1)   | 1989(1) | 1846(1) | 15(1) |
| O(1)  | -1243(2) | 1199(2) | 1068(2) | 21(1) |
| O(2)  | 6643(2)  | 4886(2) | 6051(2) | 26(1) |
| N(1)  | 2269(3)  | 1787(2) | 4004(2) | 16(1) |
| C(2)  | 1065(3)  | 1133(3) | 3210(2) | 15(1) |
| C(3)  | 551(3)   | -181(3) | 3342(2) | 18(1) |
| C(4A) | 2602(3)  | -195(3) | 5208(2) | 17(1) |
| C(4B) | 3033(3)  | 1127(3) | 4991(2) | 16(1) |
| C(4)  | 1335(4)  | -836(3) | 4337(2) | 21(1) |
| C(5)  | 3456(4)  | -797(3) | 6278(2) | 22(1) |
| C(6B) | 4351(3)  | 1817(3) | 5835(2) | 17(1) |
| C(6A) | 5150(3)  | 1203(3) | 6882(2) | 19(1) |
| C(6)  | 4666(4)  | -113(3) | 7087(2) | 22(1) |
| C(7)  | 6474(4)  | 1939(3) | 7696(2) | 24(1) |
| C(8)  | 6961(4)  | 3154(3) | 7445(2) | 23(1) |
| C(9)  | 6181(3)  | 3791(3) | 6341(2) | 20(1) |
| N(10) | 4866(3)  | 3074(2) | 5611(2) | 18(1) |
| C(10) | 1960(3)  | 2248(2) | 1227(2) | 15(1) |
| C(11) | 3246(3)  | 3193(3) | 1685(2) | 18(1) |
| C(12) | 4699(4)  | 3267(3) | 1256(2) | 22(1) |
| C(13) | 4882(4)  | 2404(3) | 377(2)  | 23(1) |
| C(14) | 3608(4)  | 1475(3) | -88(2)  | 22(1) |
| C(15) | 2147(4)  | 1395(3) | 334(2)  | 18(1) |
| C(16) | -503(3)  | 3580(3) | 2230(2) | 14(1) |
| C(17) | -756(3)  | 3907(3) | 3324(2) | 19(1) |
| C(18) | -1451(4) | 5109(3) | 3509(3) | 24(1) |
| C(19) | -1853(4) | 6003(3) | 2605(3) | 24(1) |
| C(20) | -1594(4) | 5695(3) | 1508(3) | 24(1) |
| C(21) | -932(3)  | 4489(3) | 1322(2) | 20(1) |



**Table 16 Bond lengths [Å] and angles [°] for PO-1.**

|              |            |                    |            |
|--------------|------------|--------------------|------------|
| P(1)-O(1)    | 1.4848(19) | C(21)-H(21)        | 0.99(3)    |
| P(1)-C(10)   | 1.803(3)   |                    |            |
| P(1)-C(16)   | 1.806(3)   | O(1)-P(1)-C(10)    | 112.72(11) |
| P(1)-C(2)    | 1.830(3)   | O(1)-P(1)-C(16)    | 113.33(11) |
| O(2)-C(9)    | 1.243(3)   | C(10)-P(1)-C(16)   | 107.71(12) |
| N(1)-C(2)    | 1.335(3)   | O(1)-P(1)-C(2)     | 111.66(12) |
| N(1)-C(4B)   | 1.365(3)   | C(10)-P(1)-C(2)    | 103.18(12) |
| C(2)-C(3)    | 1.411(4)   | C(16)-P(1)-C(2)    | 107.61(12) |
| C(3)-C(4)    | 1.374(4)   | C(2)-N(1)-C(4B)    | 117.1(2)   |
| C(3)-H(3)    | 0.93(2)    | N(1)-C(2)-C(3)     | 123.7(2)   |
| C(4A)-C(4)   | 1.404(4)   | N(1)-C(2)-P(1)     | 116.66(19) |
| C(4A)-C(4B)  | 1.422(4)   | C(3)-C(2)-P(1)     | 119.5(2)   |
| C(4A)-C(5)   | 1.430(4)   | C(4)-C(3)-C(2)     | 118.6(3)   |
| C(4B)-C(6B)  | 1.433(4)   | C(4)-C(3)-H(3)     | 122.6(15)  |
| C(4)-H(4)    | 0.96(3)    | C(2)-C(3)-H(3)     | 118.8(15)  |
| C(5)-C(6)    | 1.361(4)   | C(4)-C(4A)-C(4B)   | 116.9(2)   |
| C(5)-H(5)    | 0.92(3)    | C(4)-C(4A)-C(5)    | 123.7(3)   |
| C(6B)-N(10)  | 1.382(3)   | C(4B)-C(4A)-C(5)   | 119.4(2)   |
| C(6B)-C(6A)  | 1.402(3)   | N(1)-C(4B)-C(4A)   | 123.5(2)   |
| C(6A)-C(6)   | 1.425(4)   | N(1)-C(4B)-C(6B)   | 117.3(2)   |
| C(6A)-C(7)   | 1.441(4)   | C(4A)-C(4B)-C(6B)  | 119.2(2)   |
| C(6)-H(6)    | 0.95(3)    | C(3)-C(4)-C(4A)    | 120.2(3)   |
| C(7)-C(8)    | 1.344(4)   | C(3)-C(4)-H(4)     | 120.4(16)  |
| C(7)-H(7)    | 1.01(3)    | C(4A)-C(4)-H(4)    | 119.4(15)  |
| C(8)-C(9)    | 1.462(4)   | C(6)-C(5)-C(4A)    | 120.5(3)   |
| C(8)-H(8)    | 0.92(3)    | C(6)-C(5)-H(5)     | 121.8(17)  |
| C(9)-N(10)   | 1.383(3)   | C(4A)-C(5)-H(5)    | 117.7(17)  |
| N(10)-H(10N) | 0.86(3)    | N(10)-C(6B)-C(6A)  | 119.8(2)   |
| C(10)-C(15)  | 1.401(3)   | N(10)-C(6B)-C(4B)  | 120.3(2)   |
| C(10)-C(11)  | 1.403(4)   | C(6A)-C(6B)-C(4B)  | 119.9(2)   |
| C(11)-C(12)  | 1.391(4)   | C(6B)-C(6A)-C(6)   | 119.6(2)   |
| C(11)-H(11)  | 0.98(3)    | C(6B)-C(6A)-C(7)   | 117.6(3)   |
| C(12)-C(13)  | 1.393(4)   | C(6)-C(6A)-C(7)    | 122.9(2)   |
| C(12)-H(12)  | 0.95(3)    | C(5)-C(6)-C(6A)    | 121.3(3)   |
| C(13)-C(14)  | 1.387(4)   | C(5)-C(6)-H(6)     | 121.0(17)  |
| C(13)-H(13)  | 0.96(3)    | C(6A)-C(6)-H(6)    | 117.7(17)  |
| C(14)-C(15)  | 1.393(4)   | C(8)-C(7)-C(6A)    | 121.2(3)   |
| C(14)-H(14)  | 0.91(3)    | C(8)-C(7)-H(7)     | 124.7(16)  |
| C(15)-H(15)  | 0.96(3)    | C(6A)-C(7)-H(7)    | 114.1(16)  |
| C(16)-C(17)  | 1.395(3)   | C(7)-C(8)-C(9)     | 122.0(3)   |
| C(16)-C(21)  | 1.402(4)   | C(7)-C(8)-H(8)     | 119.9(18)  |
| C(17)-C(18)  | 1.397(4)   | C(9)-C(8)-H(8)     | 118.0(18)  |
| C(17)-H(17)  | 0.97(3)    | O(2)-C(9)-N(10)    | 121.1(2)   |
| C(18)-C(19)  | 1.386(4)   | O(2)-C(9)-C(8)     | 124.1(2)   |
| C(18)-H(18)  | 0.99(3)    | N(10)-C(9)-C(8)    | 114.8(3)   |
| C(19)-C(20)  | 1.396(4)   | C(6B)-N(10)-C(9)   | 124.6(2)   |
| C(19)-H(19)  | 0.99(3)    | C(6B)-N(10)-H(10N) | 119.7(19)  |
| C(20)-C(21)  | 1.389(4)   | C(9)-N(10)-H(10N)  | 115.8(19)  |
| C(20)-H(20)  | 0.96(3)    | C(15)-C(10)-C(11)  | 119.5(2)   |

|                   |           |                   |           |
|-------------------|-----------|-------------------|-----------|
| C(15)-C(10)-P(1)  | 118.3(2)  | C(17)-C(16)-P(1)  | 124.4(2)  |
| C(11)-C(10)-P(1)  | 121.9(2)  | C(21)-C(16)-P(1)  | 116.5(2)  |
| C(12)-C(11)-C(10) | 119.8(3)  | C(16)-C(17)-C(18) | 120.7(3)  |
| C(12)-C(11)-H(11) | 119.1(16) | C(16)-C(17)-H(17) | 121.5(16) |
| C(10)-C(11)-H(11) | 121.1(16) | C(18)-C(17)-H(17) | 117.7(16) |
| C(11)-C(12)-C(13) | 120.2(3)  | C(19)-C(18)-C(17) | 119.8(3)  |
| C(11)-C(12)-H(12) | 118.9(17) | C(19)-C(18)-H(18) | 117.7(16) |
| C(13)-C(12)-H(12) | 120.8(17) | C(17)-C(18)-H(18) | 122.5(16) |
| C(14)-C(13)-C(12) | 120.3(3)  | C(18)-C(19)-C(20) | 120.2(3)  |
| C(14)-C(13)-H(13) | 118.7(17) | C(18)-C(19)-H(19) | 119.0(17) |
| C(12)-C(13)-H(13) | 120.9(17) | C(20)-C(19)-H(19) | 120.9(17) |
| C(13)-C(14)-C(15) | 119.9(3)  | C(21)-C(20)-C(19) | 119.9(3)  |
| C(13)-C(14)-H(14) | 123.0(16) | C(21)-C(20)-H(20) | 121.0(17) |
| C(15)-C(14)-H(14) | 117.1(16) | C(19)-C(20)-H(20) | 119.1(17) |
| C(14)-C(15)-C(10) | 120.3(3)  | C(20)-C(21)-C(16) | 120.7(3)  |
| C(14)-C(15)-H(15) | 119.2(17) | C(20)-C(21)-H(21) | 120.9(16) |
| C(10)-C(15)-H(15) | 120.5(17) | C(16)-C(21)-H(21) | 118.4(16) |
| C(17)-C(16)-C(21) | 118.8(3)  |                   |           |

---

Symmetry transformations used to generate equivalent atoms:

**Table 17 Anisotropic displacement parameters ( $\text{\AA}^2 \times 10^3$ ) for PO-1. The anisotropic displacement factor exponent takes the form:  $-2\pi^2 [ h^2 a^{*2} U^{11} + \dots + 2 h k a^* b^* U^{12} ]$**

|       | U <sup>11</sup> | U <sup>22</sup> | U <sup>33</sup> | U <sup>23</sup> | U <sup>13</sup> | U <sup>12</sup> |
|-------|-----------------|-----------------|-----------------|-----------------|-----------------|-----------------|
| P(1)  | 14(1)           | 14(1)           | 18(1)           | 0(1)            | 4(1)            | 1(1)            |
| O(1)  | 16(1)           | 18(1)           | 26(1)           | -6(1)           | 2(1)            | -1(1)           |
| O(2)  | 27(1)           | 21(1)           | 26(1)           | 1(1)            | 1(1)            | -1(1)           |
| N(1)  | 13(1)           | 17(1)           | 19(1)           | 2(1)            | 6(1)            | 4(1)            |
| C(2)  | 12(1)           | 16(1)           | 20(1)           | 2(1)            | 10(1)           | 3(1)            |
| C(3)  | 14(1)           | 17(1)           | 24(1)           | -2(1)           | 9(1)            | 0(1)            |
| C(4A) | 15(1)           | 17(1)           | 23(1)           | 4(1)            | 12(1)           | 6(1)            |
| C(4B) | 16(1)           | 16(1)           | 19(1)           | 1(1)            | 9(1)            | 4(1)            |
| C(4)  | 23(2)           | 14(1)           | 31(2)           | 2(1)            | 16(1)           | 2(1)            |
| C(5)  | 23(2)           | 17(2)           | 30(2)           | 9(1)            | 16(1)           | 6(1)            |
| C(6B) | 18(2)           | 16(1)           | 19(1)           | 2(1)            | 10(1)           | 5(1)            |
| C(6A) | 18(2)           | 21(2)           | 20(1)           | 1(1)            | 10(1)           | 8(1)            |
| C(6)  | 21(2)           | 25(2)           | 22(1)           | 10(1)           | 10(1)           | 12(1)           |
| C(7)  | 24(2)           | 29(2)           | 18(1)           | 3(1)            | 4(1)            | 11(1)           |
| C(8)  | 21(2)           | 27(2)           | 20(1)           | -3(1)           | 2(1)            | 5(1)            |
| C(9)  | 19(2)           | 20(2)           | 22(1)           | -3(1)           | 6(1)            | 4(1)            |
| N(10) | 21(1)           | 17(1)           | 17(1)           | 2(1)            | 3(1)            | 4(1)            |
| C(10) | 13(1)           | 14(1)           | 17(1)           | 4(1)            | 3(1)            | 5(1)            |
| C(11) | 17(2)           | 18(1)           | 19(1)           | -1(1)           | 5(1)            | 1(1)            |
| C(12) | 17(2)           | 26(2)           | 24(1)           | 1(1)            | 5(1)            | -3(1)           |
| C(13) | 15(2)           | 32(2)           | 24(1)           | 6(1)            | 7(1)            | 5(1)            |
| C(14) | 26(2)           | 24(2)           | 16(1)           | 0(1)            | 5(1)            | 10(1)           |
| C(15) | 19(2)           | 16(1)           | 18(1)           | -1(1)           | 2(1)            | 3(1)            |
| C(16) | 7(1)            | 17(1)           | 19(1)           | -2(1)           | 2(1)            | 0(1)            |
| C(17) | 20(2)           | 20(2)           | 18(1)           | 3(1)            | 3(1)            | 2(1)            |
| C(18) | 22(2)           | 25(2)           | 24(1)           | -7(1)           | 5(1)            | 4(1)            |
| C(19) | 18(2)           | 18(2)           | 38(2)           | -2(1)           | 10(1)           | 7(1)            |
| C(20) | 22(2)           | 19(2)           | 31(2)           | 10(1)           | 8(1)            | 5(1)            |
| C(21) | 17(2)           | 23(2)           | 21(1)           | 2(1)            | 7(1)            | 1(1)            |

**Table 18** Hydrogen coordinates ( $\times 10^4$ ) and isotropic displacement parameters ( $\text{\AA}^2 \times 10^3$ ) for PO-1.

|        | x         | y         | z        | U(eq) |
|--------|-----------|-----------|----------|-------|
| H(3)   | -310(30)  | -570(20)  | 2760(20) | 12(7) |
| H(4)   | 1010(30)  | -1730(30) | 4450(20) | 19(7) |
| H(5)   | 3160(30)  | -1650(30) | 6400(20) | 23(8) |
| H(6)   | 5240(30)  | -510(30)  | 7800(20) | 20(7) |
| H(7)   | 6990(30)  | 1450(30)  | 8440(20) | 24(8) |
| H(8)   | 7850(40)  | 3590(30)  | 7960(20) | 28(8) |
| H(10N) | 4340(40)  | 3460(30)  | 4980(20) | 22(8) |
| H(11)  | 3150(30)  | 3800(30)  | 2310(20) | 24(8) |
| H(12)  | 5550(40)  | 3920(30)  | 1570(20) | 22(8) |
| H(13)  | 5910(40)  | 2400(30)  | 110(20)  | 27(8) |
| H(14)  | 3680(30)  | 890(20)   | -660(20) | 13(7) |
| H(15)  | 1270(30)  | 760(30)   | 0(20)    | 25(8) |
| H(17)  | -450(30)  | 3320(30)  | 3980(20) | 17(7) |
| H(18)  | -1640(30) | 5370(30)  | 4280(20) | 20(7) |
| H(19)  | -2330(40) | 6860(30)  | 2750(20) | 31(8) |
| H(20)  | -1880(30) | 6320(30)  | 890(20)  | 24(8) |
| H(21)  | -770(30)  | 4250(30)  | 540(20)  | 26(8) |

**Table 19 Torsion angles [°] for PO-1.**

---

|                         |             |                         |            |
|-------------------------|-------------|-------------------------|------------|
| C(4B)-N(1)-C(2)-C(3)    | 0.2(4)      | C(7)-C(8)-C(9)-O(2)     | -176.6(3)  |
| C(4B)-N(1)-C(2)-P(1)    | -175.86(18) | C(7)-C(8)-C(9)-N(10)    | 2.7(4)     |
| O(1)-P(1)-C(2)-N(1)     | -176.32(18) | C(6A)-C(6B)-N(10)-C(9)  | 1.9(4)     |
| C(10)-P(1)-C(2)-N(1)    | 62.4(2)     | C(4B)-C(6B)-N(10)-C(9)  | -176.6(2)  |
| C(16)-P(1)-C(2)-N(1)    | -51.4(2)    | O(2)-C(9)-N(10)-C(6B)   | 175.6(2)   |
| O(1)-P(1)-C(2)-C(3)     | 7.4(2)      | C(8)-C(9)-N(10)-C(6B)   | -3.8(4)    |
| C(10)-P(1)-C(2)-C(3)    | -113.9(2)   | O(1)-P(1)-C(10)-C(15)   | -20.2(2)   |
| C(16)-P(1)-C(2)-C(3)    | 132.4(2)    | C(16)-P(1)-C(10)-C(15)  | -146.0(2)  |
| N(1)-C(2)-C(3)-C(4)     | -0.5(4)     | C(2)-P(1)-C(10)-C(15)   | 100.4(2)   |
| P(1)-C(2)-C(3)-C(4)     | 175.5(2)    | O(1)-P(1)-C(10)-C(11)   | 165.8(2)   |
| C(2)-N(1)-C(4B)-C(4A)   | -0.5(4)     | C(16)-P(1)-C(10)-C(11)  | 40.0(2)    |
| C(2)-N(1)-C(4B)-C(6B)   | 178.7(2)    | C(2)-P(1)-C(10)-C(11)   | -73.6(2)   |
| C(4)-C(4A)-C(4B)-N(1)   | 0.9(4)      | C(15)-C(10)-C(11)-C(12) | -0.5(4)    |
| C(5)-C(4A)-C(4B)-N(1)   | -179.0(2)   | P(1)-C(10)-C(11)-C(12)  | 173.4(2)   |
| C(4)-C(4A)-C(4B)-C(6B)  | -178.3(2)   | C(10)-C(11)-C(12)-C(13) | -0.2(4)    |
| C(5)-C(4A)-C(4B)-C(6B)  | 1.8(4)      | C(11)-C(12)-C(13)-C(14) | 0.8(4)     |
| C(2)-C(3)-C(4)-C(4A)    | 1.0(4)      | C(12)-C(13)-C(14)-C(15) | -0.6(4)    |
| C(4B)-C(4A)-C(4)-C(3)   | -1.2(4)     | C(13)-C(14)-C(15)-C(10) | -0.1(4)    |
| C(5)-C(4A)-C(4)-C(3)    | 178.8(3)    | C(11)-C(10)-C(15)-C(14) | 0.7(4)     |
| C(4)-C(4A)-C(5)-C(6)    | -179.6(3)   | P(1)-C(10)-C(15)-C(14)  | -173.5(2)  |
| C(4B)-C(4A)-C(5)-C(6)   | 0.3(4)      | O(1)-P(1)-C(16)-C(17)   | 105.9(2)   |
| N(1)-C(4B)-C(6B)-N(10)  | -3.3(4)     | C(10)-P(1)-C(16)-C(17)  | -128.7(2)  |
| C(4A)-C(4B)-C(6B)-N(10) | 175.9(2)    | C(2)-P(1)-C(16)-C(17)   | -18.0(3)   |
| N(1)-C(4B)-C(6B)-C(6A)  | 178.2(2)    | O(1)-P(1)-C(16)-C(21)   | -67.9(2)   |
| C(4A)-C(4B)-C(6B)-C(6A) | -2.6(4)     | C(10)-P(1)-C(16)-C(21)  | 57.5(2)    |
| N(10)-C(6B)-C(6A)-C(6)  | -177.3(2)   | C(2)-P(1)-C(16)-C(21)   | 168.12(19) |
| C(4B)-C(6B)-C(6A)-C(6)  | 1.3(4)      | C(21)-C(16)-C(17)-C(18) | 1.1(4)     |
| N(10)-C(6B)-C(6A)-C(7)  | 1.1(4)      | P(1)-C(16)-C(17)-C(18)  | -172.6(2)  |
| C(4B)-C(6B)-C(6A)-C(7)  | 179.6(2)    | C(16)-C(17)-C(18)-C(19) | -1.7(4)    |
| C(4A)-C(5)-C(6)-C(6A)   | -1.7(4)     | C(17)-C(18)-C(19)-C(20) | 1.2(4)     |
| C(6B)-C(6A)-C(6)-C(5)   | 0.9(4)      | C(18)-C(19)-C(20)-C(21) | 0.0(4)     |
| C(7)-C(6A)-C(6)-C(5)    | -177.4(3)   | C(19)-C(20)-C(21)-C(16) | -0.6(4)    |
| C(6B)-C(6A)-C(7)-C(8)   | -2.0(4)     | C(17)-C(16)-C(21)-C(20) | 0.1(4)     |
| C(6)-C(6A)-C(7)-C(8)    | 176.3(3)    | P(1)-C(16)-C(21)-C(20)  | 174.3(2)   |
| C(6A)-C(7)-C(8)-C(9)    | 0.0(4)      |                         |            |

---

Symmetry transformations used to generate equivalent atoms:

**Table 20 Hydrogen bonds for PO-1 [ $\text{\AA}$  and  $^\circ$ ].**

| D-H...A               | d(D-H)  | d(H...A) | d(D...A) | $\angle$ (DHA) |
|-----------------------|---------|----------|----------|----------------|
| N(10)-H(10N)...O(2)#1 | 0.86(3) | 2.13(3)  | 2.937(3) | 155(3)         |

Symmetry transformations used to generate equivalent atoms:  
#1 -x+1,-y+1,-z+1

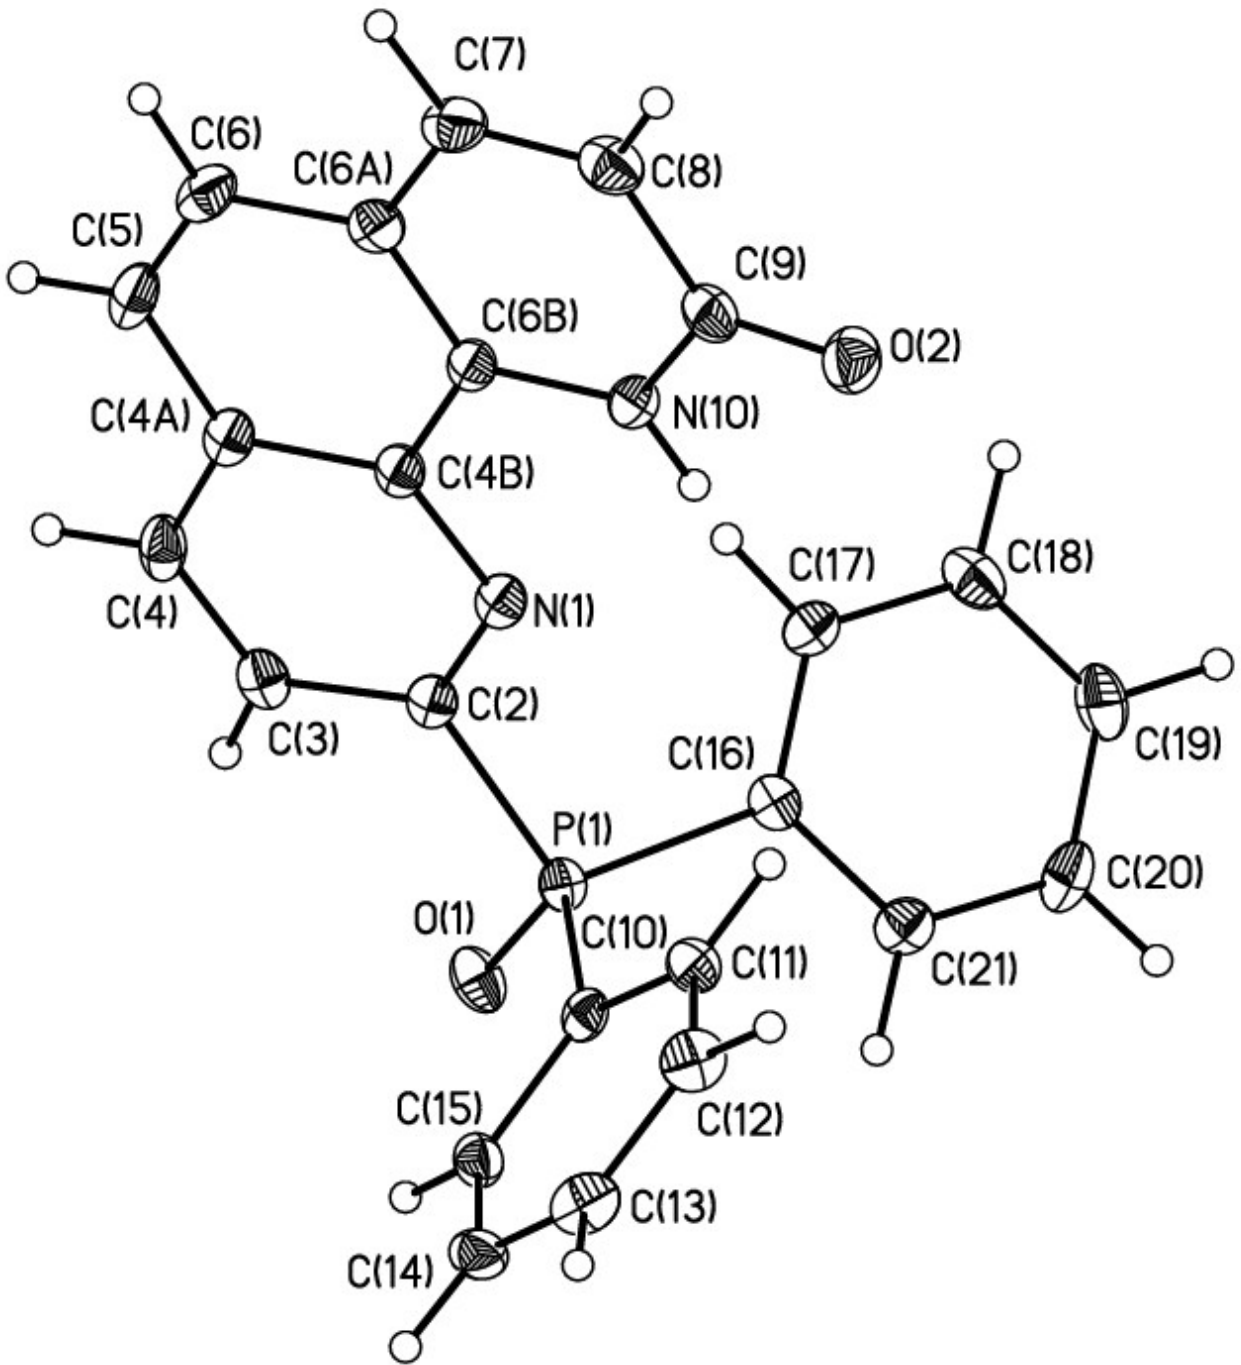

Figure 5 A general view of the PO-1 structure in representation of non-hydrogen atoms by probability ellipsoids of atomic displacements ( $p=0.5$ ).

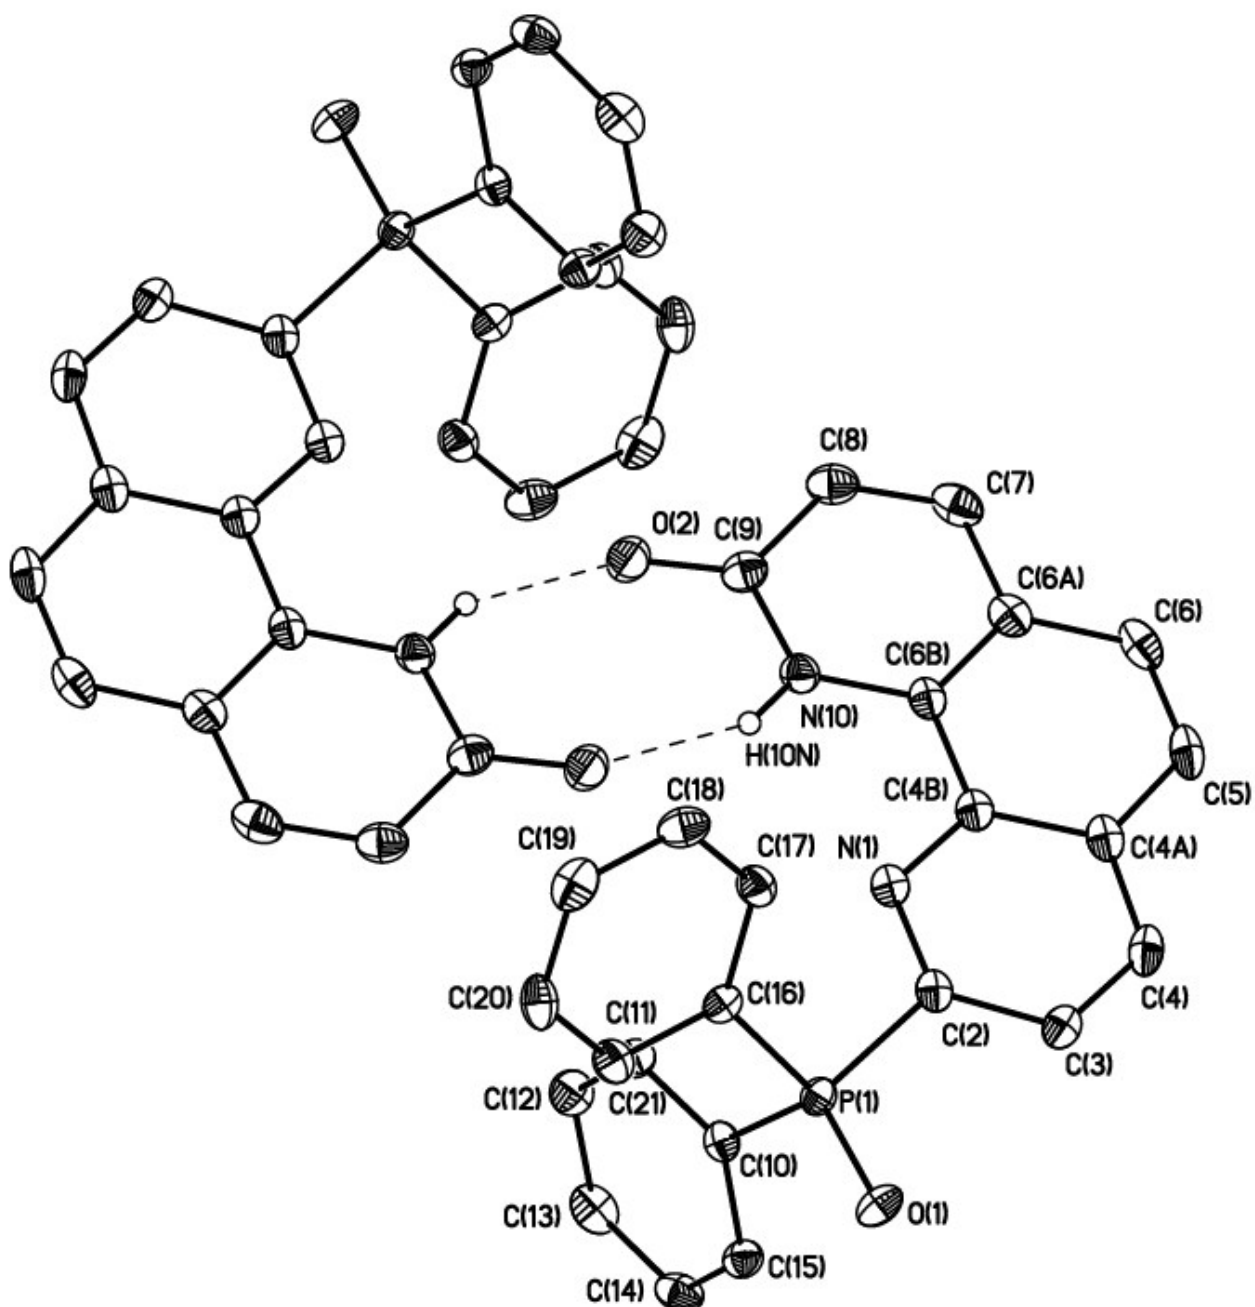

Figure 6 The centrosymmetric hydrogen-bonded dimer of PO-1 in crystal in representation of non-hydrogen atoms by probability ellipsoids of atomic displacements ( $p=0.5$ ). All hydrogen atoms are omitted for clarity with the only exception of the H(10N) atom involved in the H-bond. Atom labels are presented only for the independent part.



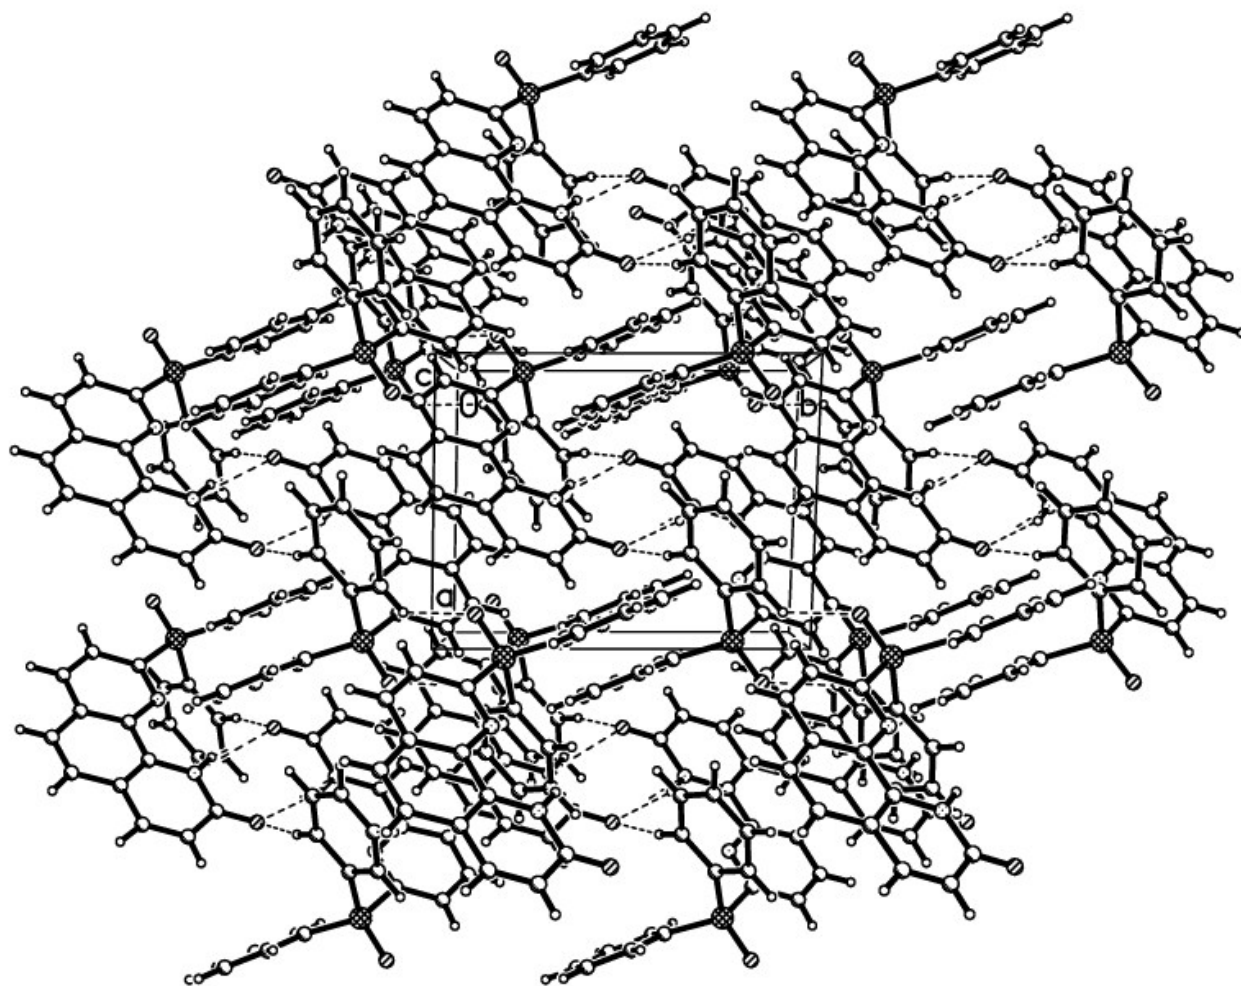

Figure 7 A fragment of the PO-1 crystal packing along the *ab* plane.

## PnPPO Structure

**Table 21 Crystal data and structure refinement for PnPPO.**

|                                   |                                                                              |                 |
|-----------------------------------|------------------------------------------------------------------------------|-----------------|
| Identification code               | a_sq                                                                         |                 |
| Empirical formula                 | C <sub>36</sub> H <sub>26</sub> N <sub>2</sub> O <sub>2</sub> P <sub>2</sub> |                 |
| Formula weight                    | 580.53                                                                       |                 |
| Temperature                       | 120(2) K                                                                     |                 |
| Wavelength                        | 0.71073 Å                                                                    |                 |
| Crystal system                    | Triclinic                                                                    |                 |
| Space group                       | P-1                                                                          |                 |
| Unit cell dimensions              | a = 8.5375(11) Å                                                             | α = 69.800(3)°. |
|                                   | b = 12.2811(16) Å                                                            | β = 84.355(3)°. |
|                                   | c = 15.439(2) Å                                                              | γ = 84.962(3)°. |
| Volume                            | 1509.3(3) Å <sup>3</sup>                                                     |                 |
| Z                                 | 2                                                                            |                 |
| Density (calculated)              | 1.277 Mg/m <sup>3</sup>                                                      |                 |
| Absorption coefficient            | 0.179 mm <sup>-1</sup>                                                       |                 |
| F(000)                            | 604                                                                          |                 |
| Crystal size                      | 0.380 x 0.320 x 0.190 mm <sup>3</sup>                                        |                 |
| Theta range for data collection   | 2.401 to 27.999°.                                                            |                 |
| Index ranges                      | -11 ≤ h ≤ 11, -16 ≤ k ≤ 16, -20 ≤ l ≤ 20                                     |                 |
| Reflections collected             | 16937                                                                        |                 |
| Independent reflections           | 7281 [R(int) = 0.1196]                                                       |                 |
| Completeness to theta = 25.242°   | 99.9 %                                                                       |                 |
| Absorption correction             | Semi-empirical from equivalents                                              |                 |
| Max. and min. transmission        | 0.975 and 0.922                                                              |                 |
| Refinement method                 | Full-matrix least-squares on F <sup>2</sup>                                  |                 |
| Data / restraints / parameters    | 7281 / 0 / 379                                                               |                 |
| Goodness-of-fit on F <sup>2</sup> | 0.872                                                                        |                 |
| Final R indices [I > 2σ(I)]       | R1 = 0.0738, wR2 = 0.1568                                                    |                 |
| R indices (all data)              | R1 = 0.1998, wR2 = 0.2189                                                    |                 |
| Extinction coefficient            | n/a                                                                          |                 |
| Largest diff. peak and hole       | 0.469 and -0.541 e. Å <sup>-3</sup>                                          |                 |

**Table 22 Atomic coordinates (  $\times 10^4$  ) and equivalent isotropic displacement parameters ( $\text{\AA}^2 \times 10^3$ ) for PnPPO.  $U(\text{eq})$  is defined as one third of the trace of the orthogonalized  $U^{ij}$  tensor.**

|       | x        | y        | z       | U(eq) |
|-------|----------|----------|---------|-------|
| P(1)  | 7401(1)  | 5221(1)  | 3190(1) | 30(1) |
| P(2)  | 11374(2) | 370(1)   | 2170(1) | 36(1) |
| O(1)  | 6342(3)  | 6097(2)  | 3465(2) | 36(1) |
| O(2)  | 12347(4) | -698(3)  | 2168(2) | 46(1) |
| N(1)  | 7699(4)  | 2864(3)  | 3714(2) | 27(1) |
| N(2)  | 9231(4)  | 974(3)   | 3343(2) | 30(1) |
| C(1)  | 7281(5)  | 5352(4)  | 2000(3) | 32(1) |
| C(2)  | 8238(6)  | 4680(5)  | 1596(3) | 44(1) |
| C(3)  | 8052(7)  | 4744(5)  | 703(4)  | 57(2) |
| C(4)  | 6898(7)  | 5490(5)  | 201(4)  | 58(2) |
| C(5)  | 5955(8)  | 6178(5)  | 594(4)  | 61(2) |
| C(6)  | 6115(6)  | 6117(4)  | 1497(4) | 45(1) |
| C(7)  | 9431(5)  | 5330(3)  | 3338(3) | 25(1) |
| C(8)  | 10253(6) | 4529(4)  | 4041(3) | 36(1) |
| C(9)  | 11781(6) | 4706(4)  | 4158(3) | 41(1) |
| C(10) | 12495(6) | 5692(4)  | 3586(3) | 38(1) |
| C(11) | 11684(6) | 6507(4)  | 2899(4) | 42(1) |
| C(12) | 10163(6) | 6326(4)  | 2778(3) | 40(1) |
| C(13) | 6914(5)  | 3745(4)  | 3905(3) | 27(1) |
| C(14) | 5763(5)  | 3625(4)  | 4636(3) | 32(1) |
| C(15) | 5460(5)  | 2520(4)  | 5226(3) | 33(1) |
| C(16) | 6289(5)  | 1570(4)  | 5074(3) | 28(1) |
| C(17) | 7385(5)  | 1772(3)  | 4292(3) | 27(1) |
| C(18) | 6085(6)  | 408(4)   | 5701(3) | 35(1) |
| C(19) | 6897(5)  | -500(4)  | 5557(3) | 35(1) |
| C(20) | 8010(5)  | -339(4)  | 4758(3) | 31(1) |
| C(21) | 8232(5)  | 787(4)   | 4112(3) | 28(1) |
| C(22) | 8889(6)  | -1275(4) | 4593(3) | 38(1) |
| C(23) | 9927(6)  | -1085(4) | 3833(3) | 37(1) |
| C(24) | 10055(5) | 67(4)    | 3216(3) | 32(1) |
| C(25) | 10082(6) | 910(4)   | 1250(3) | 39(1) |
| C(26) | 10344(8) | 1904(5)  | 491(4)  | 64(2) |
| C(27) | 9359(9)  | 2246(6)  | -229(4) | 82(2) |
| C(28) | 8145(9)  | 1574(6)  | -203(4) | 73(2) |
| C(29) | 7867(7)  | 601(5)   | 537(4)  | 62(2) |
| C(30) | 8811(7)  | 256(5)   | 1266(4) | 53(2) |
| C(31) | 12560(6) | 1533(4)  | 2134(3) | 32(1) |
| C(32) | 14162(6) | 1394(4)  | 1977(3) | 39(1) |
| C(33) | 15137(6) | 2233(4)  | 2010(3) | 46(1) |
| C(34) | 14484(7) | 3207(4)  | 2188(3) | 43(1) |
| C(35) | 12880(6) | 3372(4)  | 2320(3) | 39(1) |
| C(36) | 11898(6) | 2525(4)  | 2304(3) | 36(1) |

**Table 23 Bond lengths [Å] and angles [°] for PnPPO.**

|              |          |                  |            |
|--------------|----------|------------------|------------|
| P(1)-O(1)    | 1.491(3) | C(22)-H(22A)     | 0.9500     |
| P(1)-C(1)    | 1.799(5) | C(23)-C(24)      | 1.413(6)   |
| P(1)-C(7)    | 1.793(4) | C(23)-H(23A)     | 0.9500     |
| P(1)-C(13)   | 1.827(4) | C(25)-C(30)      | 1.399(7)   |
| P(2)-O(2)    | 1.490(3) | C(25)-C(26)      | 1.386(7)   |
| P(2)-C(31)   | 1.805(4) | C(26)-C(27)      | 1.386(8)   |
| P(2)-C(25)   | 1.790(5) | C(26)-H(26A)     | 0.9500     |
| P(2)-C(24)   | 1.820(5) | C(27)-C(28)      | 1.370(9)   |
| N(1)-C(13)   | 1.327(5) | C(27)-H(27A)     | 0.9500     |
| N(1)-C(17)   | 1.362(5) | C(28)-C(29)      | 1.357(8)   |
| N(2)-C(24)   | 1.327(5) | C(28)-H(28A)     | 0.9500     |
| N(2)-C(21)   | 1.356(5) | C(29)-C(30)      | 1.372(8)   |
| C(1)-C(2)    | 1.369(7) | C(29)-H(29A)     | 0.9500     |
| C(1)-C(6)    | 1.401(6) | C(30)-H(30A)     | 0.9500     |
| C(2)-C(3)    | 1.379(7) | C(31)-C(32)      | 1.372(6)   |
| C(2)-H(2A)   | 0.9500   | C(31)-C(36)      | 1.394(6)   |
| C(3)-C(4)    | 1.382(8) | C(32)-C(33)      | 1.397(6)   |
| C(3)-H(3A)   | 0.9500   | C(32)-H(32A)     | 0.9500     |
| C(4)-C(5)    | 1.366(8) | C(33)-C(34)      | 1.378(7)   |
| C(4)-H(4A)   | 0.9500   | C(33)-H(33A)     | 0.9500     |
| C(5)-C(6)    | 1.390(7) | C(34)-C(35)      | 1.372(7)   |
| C(5)-H(5A)   | 0.9500   | C(34)-H(34A)     | 0.9500     |
| C(6)-H(6A)   | 0.9500   | C(35)-C(36)      | 1.400(6)   |
| C(7)-C(12)   | 1.390(6) | C(35)-H(35A)     | 0.9500     |
| C(7)-C(8)    | 1.390(6) | C(36)-H(36A)     | 0.9500     |
| C(8)-C(9)    | 1.380(6) |                  |            |
| C(8)-H(8A)   | 0.9500   | O(1)-P(1)-C(1)   | 112.7(2)   |
| C(9)-C(10)   | 1.379(6) | O(1)-P(1)-C(7)   | 112.31(19) |
| C(9)-H(9A)   | 0.9500   | C(1)-P(1)-C(7)   | 107.0(2)   |
| C(10)-C(11)  | 1.377(6) | O(1)-P(1)-C(13)  | 110.9(2)   |
| C(10)-H(10A) | 0.9500   | C(1)-P(1)-C(13)  | 107.6(2)   |
| C(11)-C(12)  | 1.377(6) | C(7)-P(1)-C(13)  | 106.04(19) |
| C(11)-H(11A) | 0.9500   | O(2)-P(2)-C(31)  | 112.4(2)   |
| C(12)-H(12A) | 0.9500   | O(2)-P(2)-C(25)  | 113.9(2)   |
| C(13)-C(14)  | 1.398(6) | C(31)-P(2)-C(25) | 108.4(2)   |
| C(14)-C(15)  | 1.378(6) | O(2)-P(2)-C(24)  | 110.5(2)   |
| C(14)-H(14A) | 0.9500   | C(31)-P(2)-C(24) | 107.1(2)   |
| C(15)-C(16)  | 1.389(6) | C(25)-P(2)-C(24) | 104.1(2)   |
| C(15)-H(15A) | 0.9500   | C(13)-N(1)-C(17) | 117.1(4)   |
| C(16)-C(18)  | 1.435(6) | C(24)-N(2)-C(21) | 118.2(4)   |
| C(16)-C(17)  | 1.417(6) | C(2)-C(1)-C(6)   | 119.6(5)   |
| C(17)-C(21)  | 1.450(6) | C(2)-C(1)-P(1)   | 121.7(4)   |
| C(18)-C(19)  | 1.333(6) | C(6)-C(1)-P(1)   | 118.6(4)   |
| C(18)-H(18A) | 0.9500   | C(1)-C(2)-C(3)   | 120.5(5)   |
| C(19)-C(20)  | 1.448(6) | C(1)-C(2)-H(2A)  | 119.7      |
| C(19)-H(19A) | 0.9500   | C(3)-C(2)-H(2A)  | 119.7      |
| C(20)-C(22)  | 1.401(6) | C(4)-C(3)-C(2)   | 120.4(6)   |
| C(20)-C(21)  | 1.414(6) | C(4)-C(3)-H(3A)  | 119.8      |
| C(22)-C(23)  | 1.363(6) | C(2)-C(3)-H(3A)  | 119.8      |

|                    |          |                    |          |
|--------------------|----------|--------------------|----------|
| C(3)-C(4)-C(5)     | 119.5(6) | C(19)-C(20)-C(21)  | 120.1(4) |
| C(3)-C(4)-H(4A)    | 120.3    | N(2)-C(21)-C(17)   | 119.1(4) |
| C(5)-C(4)-H(4A)    | 120.3    | N(2)-C(21)-C(20)   | 122.1(4) |
| C(6)-C(5)-C(4)     | 120.9(6) | C(17)-C(21)-C(20)  | 118.7(4) |
| C(6)-C(5)-H(5A)    | 119.5    | C(23)-C(22)-C(20)  | 120.1(4) |
| C(4)-C(5)-H(5A)    | 119.5    | C(23)-C(22)-H(22A) | 119.9    |
| C(5)-C(6)-C(1)     | 119.1(5) | C(20)-C(22)-H(22A) | 119.9    |
| C(5)-C(6)-H(6A)    | 120.5    | C(22)-C(23)-C(24)  | 118.3(4) |
| C(1)-C(6)-H(6A)    | 120.5    | C(22)-C(23)-H(23A) | 120.9    |
| C(12)-C(7)-C(8)    | 118.5(4) | C(24)-C(23)-H(23A) | 120.9    |
| C(12)-C(7)-P(1)    | 117.9(3) | N(2)-C(24)-C(23)   | 123.4(4) |
| C(8)-C(7)-P(1)     | 123.2(3) | N(2)-C(24)-P(2)    | 116.3(3) |
| C(9)-C(8)-C(7)     | 120.4(4) | C(23)-C(24)-P(2)   | 120.3(4) |
| C(9)-C(8)-H(8A)    | 119.8    | C(30)-C(25)-C(26)  | 118.4(5) |
| C(7)-C(8)-H(8A)    | 119.8    | C(30)-C(25)-P(2)   | 118.4(4) |
| C(10)-C(9)-C(8)    | 120.1(5) | C(26)-C(25)-P(2)   | 123.0(4) |
| C(10)-C(9)-H(9A)   | 119.9    | C(27)-C(26)-C(25)  | 120.7(6) |
| C(8)-C(9)-H(9A)    | 119.9    | C(27)-C(26)-H(26A) | 119.7    |
| C(9)-C(10)-C(11)   | 120.2(5) | C(25)-C(26)-H(26A) | 119.7    |
| C(9)-C(10)-H(10A)  | 119.9    | C(28)-C(27)-C(26)  | 119.6(6) |
| C(11)-C(10)-H(10A) | 119.9    | C(28)-C(27)-H(27A) | 120.2    |
| C(10)-C(11)-C(12)  | 119.7(4) | C(26)-C(27)-H(27A) | 120.2    |
| C(10)-C(11)-H(11A) | 120.2    | C(27)-C(28)-C(29)  | 120.5(6) |
| C(12)-C(11)-H(11A) | 120.2    | C(27)-C(28)-H(28A) | 119.8    |
| C(7)-C(12)-C(11)   | 121.1(4) | C(29)-C(28)-H(28A) | 119.8    |
| C(7)-C(12)-H(12A)  | 119.5    | C(30)-C(29)-C(28)  | 121.0(6) |
| C(11)-C(12)-H(12A) | 119.5    | C(30)-C(29)-H(29A) | 119.5    |
| N(1)-C(13)-C(14)   | 124.5(4) | C(28)-C(29)-H(29A) | 119.5    |
| N(1)-C(13)-P(1)    | 118.2(3) | C(29)-C(30)-C(25)  | 119.9(5) |
| C(14)-C(13)-P(1)   | 117.3(3) | C(29)-C(30)-H(30A) | 120.1    |
| C(15)-C(14)-C(13)  | 118.2(4) | C(25)-C(30)-H(30A) | 120.1    |
| C(15)-C(14)-H(14A) | 120.9    | C(32)-C(31)-C(36)  | 120.1(4) |
| C(13)-C(14)-H(14A) | 120.9    | C(32)-C(31)-P(2)   | 118.0(4) |
| C(14)-C(15)-C(16)  | 119.5(4) | C(36)-C(31)-P(2)   | 121.9(4) |
| C(14)-C(15)-H(15A) | 120.2    | C(31)-C(32)-C(33)  | 120.0(5) |
| C(16)-C(15)-H(15A) | 120.3    | C(31)-C(32)-H(32A) | 120.0    |
| C(15)-C(16)-C(18)  | 121.5(4) | C(33)-C(32)-H(32A) | 120.0    |
| C(15)-C(16)-C(17)  | 118.4(4) | C(32)-C(33)-C(34)  | 119.9(5) |
| C(18)-C(16)-C(17)  | 120.1(4) | C(32)-C(33)-H(33A) | 120.1    |
| N(1)-C(17)-C(21)   | 118.8(4) | C(34)-C(33)-H(33A) | 120.1    |
| N(1)-C(17)-C(16)   | 122.2(4) | C(35)-C(34)-C(33)  | 120.6(5) |
| C(21)-C(17)-C(16)  | 119.0(4) | C(35)-C(34)-H(34A) | 119.7    |
| C(19)-C(18)-C(16)  | 121.3(4) | C(33)-C(34)-H(34A) | 119.7    |
| C(19)-C(18)-H(18A) | 119.4    | C(34)-C(35)-C(36)  | 119.8(5) |
| C(16)-C(18)-H(18A) | 119.4    | C(34)-C(35)-H(35A) | 120.1    |
| C(18)-C(19)-C(20)  | 120.7(4) | C(36)-C(35)-H(35A) | 120.1    |
| C(18)-C(19)-H(19A) | 119.6    | C(31)-C(36)-C(35)  | 119.6(5) |
| C(20)-C(19)-H(19A) | 119.6    | C(31)-C(36)-H(36A) | 120.2    |
| C(22)-C(20)-C(19)  | 122.0(4) | C(35)-C(36)-H(36A) | 120.2    |
| C(22)-C(20)-C(21)  | 117.8(4) |                    |          |

---

Symmetry transformations used to generate equivalent atoms:

**Table 24 Anisotropic displacement parameters ( $\text{\AA}^2 \times 10^3$ ) for PnPPO. The anisotropic displacement factor exponent takes the form:  $-2\pi^2 [h^2 a^{*2} U^{11} + \dots + 2 h k a^* b^* U^{12}]$**

|       | U <sup>11</sup> | U <sup>22</sup> | U <sup>33</sup> | U <sup>23</sup> | U <sup>13</sup> | U <sup>12</sup> |
|-------|-----------------|-----------------|-----------------|-----------------|-----------------|-----------------|
| P(1)  | 28(1)           | 25(1)           | 34(1)           | -6(1)           | -5(1)           | -4(1)           |
| P(2)  | 42(1)           | 27(1)           | 43(1)           | -17(1)          | 9(1)            | -12(1)          |
| O(1)  | 32(2)           | 26(2)           | 48(2)           | -10(2)          | -3(2)           | -1(1)           |
| O(2)  | 56(2)           | 29(2)           | 56(2)           | -21(2)          | 13(2)           | -8(2)           |
| N(1)  | 31(2)           | 25(2)           | 25(2)           | -8(2)           | -6(2)           | -4(2)           |
| N(2)  | 31(2)           | 30(2)           | 30(2)           | -12(2)          | -1(2)           | -9(2)           |
| C(1)  | 34(3)           | 32(3)           | 27(2)           | 0(2)            | -10(2)          | -12(2)          |
| C(2)  | 43(3)           | 59(3)           | 28(3)           | -11(2)          | -2(2)           | -3(3)           |
| C(3)  | 53(4)           | 79(4)           | 39(3)           | -21(3)          | 11(3)           | -15(3)          |
| C(4)  | 67(4)           | 73(4)           | 31(3)           | -4(3)           | -10(3)          | -35(3)          |
| C(5)  | 75(5)           | 50(4)           | 47(4)           | 8(3)            | -27(3)          | -19(3)          |
| C(6)  | 48(3)           | 34(3)           | 46(3)           | -2(2)           | -15(3)          | -8(2)           |
| C(7)  | 27(2)           | 21(2)           | 26(2)           | -8(2)           | -4(2)           | -2(2)           |
| C(8)  | 38(3)           | 30(3)           | 37(3)           | -5(2)           | -5(2)           | -6(2)           |
| C(9)  | 36(3)           | 43(3)           | 43(3)           | -10(2)          | -11(2)          | -7(2)           |
| C(10) | 33(3)           | 39(3)           | 46(3)           | -19(2)          | -4(2)           | -8(2)           |
| C(11) | 42(3)           | 32(3)           | 50(3)           | -9(2)           | -5(3)           | -13(2)          |
| C(12) | 42(3)           | 32(3)           | 42(3)           | -5(2)           | -7(3)           | -8(2)           |
| C(13) | 25(2)           | 33(2)           | 24(2)           | -8(2)           | -5(2)           | -4(2)           |
| C(14) | 28(3)           | 34(3)           | 34(3)           | -13(2)          | 1(2)            | -1(2)           |
| C(15) | 32(3)           | 37(3)           | 28(3)           | -11(2)          | 2(2)            | -5(2)           |
| C(16) | 27(3)           | 31(2)           | 24(2)           | -7(2)           | -2(2)           | -7(2)           |
| C(17) | 25(2)           | 27(2)           | 26(2)           | -4(2)           | -6(2)           | -4(2)           |
| C(18) | 36(3)           | 36(3)           | 30(3)           | -7(2)           | 0(2)            | -9(2)           |
| C(19) | 36(3)           | 30(3)           | 33(3)           | -2(2)           | -5(2)           | -8(2)           |
| C(20) | 32(3)           | 26(2)           | 35(3)           | -6(2)           | -5(2)           | -8(2)           |
| C(21) | 33(3)           | 26(2)           | 25(2)           | -6(2)           | 0(2)            | -10(2)          |
| C(22) | 42(3)           | 26(2)           | 37(3)           | -2(2)           | 1(2)            | -11(2)          |
| C(23) | 39(3)           | 25(2)           | 46(3)           | -10(2)          | 2(3)            | -5(2)           |
| C(24) | 33(3)           | 27(2)           | 40(3)           | -14(2)          | 2(2)            | -9(2)           |
| C(25) | 56(3)           | 33(3)           | 29(3)           | -12(2)          | 3(2)            | -6(2)           |
| C(26) | 97(5)           | 58(4)           | 43(4)           | -18(3)          | -4(4)           | -32(4)          |
| C(27) | 136(7)          | 67(4)           | 40(4)           | -7(3)           | -21(4)          | -30(5)          |
| C(28) | 105(6)          | 76(5)           | 47(4)           | -29(4)          | -17(4)          | -5(4)           |
| C(29) | 57(4)           | 76(4)           | 59(4)           | -32(4)          | 3(3)            | -12(3)          |
| C(30) | 53(4)           | 57(4)           | 51(4)           | -21(3)          | 5(3)            | -14(3)          |
| C(31) | 38(3)           | 26(2)           | 29(3)           | -5(2)           | 4(2)            | -13(2)          |
| C(32) | 46(3)           | 33(3)           | 34(3)           | -6(2)           | 3(2)            | -7(2)           |
| C(33) | 43(3)           | 44(3)           | 43(3)           | 3(2)            | -9(3)           | -17(3)          |
| C(34) | 60(4)           | 35(3)           | 30(3)           | -2(2)           | -9(3)           | -21(3)          |
| C(35) | 55(4)           | 29(3)           | 37(3)           | -12(2)          | -4(3)           | -13(2)          |
| C(36) | 44(3)           | 29(2)           | 32(3)           | -6(2)           | 1(2)            | -11(2)          |

**Table 25** Hydrogen coordinates (  $\times 10^4$ ) and isotropic displacement parameters ( $\text{\AA}^2 \times 10^3$ ) for PnPPO.

|        | x     | y     | z    | U(eq) |
|--------|-------|-------|------|-------|
| H(2A)  | 9036  | 4166  | 1934 | 53    |
| H(3A)  | 8721  | 4272  | 430  | 69    |
| H(4A)  | 6762  | 5524  | -411 | 70    |
| H(5A)  | 5179  | 6705  | 244  | 73    |
| H(6A)  | 5443  | 6589  | 1769 | 54    |
| H(8A)  | 9761  | 3855  | 4444 | 44    |
| H(9A)  | 12342 | 4148  | 4634 | 49    |
| H(10A) | 13549 | 5808  | 3666 | 45    |
| H(11A) | 12171 | 7191  | 2510 | 50    |
| H(12A) | 9606  | 6892  | 2305 | 48    |
| H(14A) | 5205  | 4287  | 4725 | 38    |
| H(15A) | 4690  | 2410  | 5732 | 39    |
| H(18A) | 5358  | 283   | 6228 | 42    |
| H(19A) | 6743  | -1260 | 5983 | 42    |
| H(22A) | 8760  | -2044 | 5010 | 45    |
| H(23A) | 10549 | -1710 | 3722 | 44    |
| H(26A) | 11207 | 2355  | 464  | 77    |
| H(27A) | 9524  | 2941  | -738 | 98    |
| H(28A) | 7492  | 1790  | -707 | 88    |
| H(29A) | 7007  | 153   | 551  | 74    |
| H(30A) | 8601  | -425  | 1780 | 63    |
| H(32A) | 14609 | 727   | 1846 | 47    |
| H(33A) | 16248 | 2131  | 1909 | 56    |
| H(34A) | 15151 | 3770  | 2219 | 51    |
| H(35A) | 12438 | 4058  | 2422 | 47    |
| H(36A) | 10788 | 2626  | 2408 | 43    |

**Table 26 Torsion angles [°] for PnPPO.**

|                         |           |                         |           |
|-------------------------|-----------|-------------------------|-----------|
| O(1)-P(1)-C(1)-C(2)     | 175.5(4)  | C(16)-C(18)-C(19)-C(20) | -0.2(7)   |
| C(7)-P(1)-C(1)-C(2)     | 51.6(4)   | C(18)-C(19)-C(20)-C(22) | 179.5(4)  |
| C(13)-P(1)-C(1)-C(2)    | -62.0(4)  | C(18)-C(19)-C(20)-C(21) | -0.9(7)   |
| O(1)-P(1)-C(1)-C(6)     | -8.1(4)   | C(24)-N(2)-C(21)-C(17)  | 176.6(4)  |
| C(7)-P(1)-C(1)-C(6)     | -132.0(4) | C(24)-N(2)-C(21)-C(20)  | -2.1(6)   |
| C(13)-P(1)-C(1)-C(6)    | 114.4(4)  | N(1)-C(17)-C(21)-N(2)   | -4.4(6)   |
| C(6)-C(1)-C(2)-C(3)     | -0.6(7)   | C(16)-C(17)-C(21)-N(2)  | 177.2(4)  |
| P(1)-C(1)-C(2)-C(3)     | 175.7(4)  | N(1)-C(17)-C(21)-C(20)  | 174.4(4)  |
| C(1)-C(2)-C(3)-C(4)     | 0.2(8)    | C(16)-C(17)-C(21)-C(20) | -4.0(6)   |
| C(2)-C(3)-C(4)-C(5)     | 0.9(8)    | C(22)-C(20)-C(21)-N(2)  | 1.3(7)    |
| C(3)-C(4)-C(5)-C(6)     | -1.6(8)   | C(19)-C(20)-C(21)-N(2)  | -178.3(4) |
| C(4)-C(5)-C(6)-C(1)     | 1.1(8)    | C(22)-C(20)-C(21)-C(17) | -177.4(4) |
| C(2)-C(1)-C(6)-C(5)     | 0.0(7)    | C(19)-C(20)-C(21)-C(17) | 3.0(6)    |
| P(1)-C(1)-C(6)-C(5)     | -176.5(4) | C(19)-C(20)-C(22)-C(23) | -179.8(4) |
| O(1)-P(1)-C(7)-C(12)    | -66.5(4)  | C(21)-C(20)-C(22)-C(23) | 0.6(7)    |
| C(1)-P(1)-C(7)-C(12)    | 57.7(4)   | C(20)-C(22)-C(23)-C(24) | -1.6(7)   |
| C(13)-P(1)-C(7)-C(12)   | 172.3(4)  | C(21)-N(2)-C(24)-C(23)  | 1.0(7)    |
| O(1)-P(1)-C(7)-C(8)     | 106.8(4)  | C(21)-N(2)-C(24)-P(2)   | 179.9(3)  |
| C(1)-P(1)-C(7)-C(8)     | -129.0(4) | C(22)-C(23)-C(24)-N(2)  | 0.9(7)    |
| C(13)-P(1)-C(7)-C(8)    | -14.4(4)  | C(22)-C(23)-C(24)-P(2)  | -178.0(4) |
| C(12)-C(7)-C(8)-C(9)    | -2.0(7)   | O(2)-P(2)-C(24)-N(2)    | 173.8(3)  |
| P(1)-C(7)-C(8)-C(9)     | -175.3(4) | C(31)-P(2)-C(24)-N(2)   | 51.1(4)   |
| C(7)-C(8)-C(9)-C(10)    | 1.0(8)    | C(25)-P(2)-C(24)-N(2)   | -63.6(4)  |
| C(8)-C(9)-C(10)-C(11)   | 0.4(8)    | O(2)-P(2)-C(24)-C(23)   | -7.3(5)   |
| C(9)-C(10)-C(11)-C(12)  | -0.8(8)   | C(31)-P(2)-C(24)-C(23)  | -130.0(4) |
| C(8)-C(7)-C(12)-C(11)   | 1.6(7)    | C(25)-P(2)-C(24)-C(23)  | 115.4(4)  |
| P(1)-C(7)-C(12)-C(11)   | 175.3(4)  | O(2)-P(2)-C(25)-C(30)   | 68.6(5)   |
| C(10)-C(11)-C(12)-C(7)  | -0.2(8)   | C(31)-P(2)-C(25)-C(30)  | -165.5(4) |
| C(17)-N(1)-C(13)-C(14)  | -2.1(6)   | C(24)-P(2)-C(25)-C(30)  | -51.7(4)  |
| C(17)-N(1)-C(13)-P(1)   | 176.0(3)  | O(2)-P(2)-C(25)-C(26)   | -106.8(5) |
| O(1)-P(1)-C(13)-N(1)    | 176.5(3)  | C(31)-P(2)-C(25)-C(26)  | 19.1(5)   |
| C(1)-P(1)-C(13)-N(1)    | 52.9(4)   | C(24)-P(2)-C(25)-C(26)  | 132.8(5)  |
| C(7)-P(1)-C(13)-N(1)    | -61.3(4)  | C(30)-C(25)-C(26)-C(27) | 0.6(9)    |
| O(1)-P(1)-C(13)-C(14)   | -5.2(4)   | P(2)-C(25)-C(26)-C(27)  | 176.1(5)  |
| C(1)-P(1)-C(13)-C(14)   | -128.9(4) | C(25)-C(26)-C(27)-C(28) | -2.1(10)  |
| C(7)-P(1)-C(13)-C(14)   | 117.0(3)  | C(26)-C(27)-C(28)-C(29) | 2.4(11)   |
| N(1)-C(13)-C(14)-C(15)  | 2.8(7)    | C(27)-C(28)-C(29)-C(30) | -1.3(10)  |
| P(1)-C(13)-C(14)-C(15)  | -175.3(3) | C(28)-C(29)-C(30)-C(25) | -0.1(9)   |
| C(13)-C(14)-C(15)-C(16) | -0.4(7)   | C(26)-C(25)-C(30)-C(29) | 0.5(8)    |
| C(14)-C(15)-C(16)-C(18) | 176.1(4)  | P(2)-C(25)-C(30)-C(29)  | -175.2(4) |
| C(14)-C(15)-C(16)-C(17) | -2.3(7)   | O(2)-P(2)-C(31)-C(32)   | 9.1(4)    |
| C(13)-N(1)-C(17)-C(21)  | -179.3(4) | C(25)-P(2)-C(31)-C(32)  | -117.6(4) |
| C(13)-N(1)-C(17)-C(16)  | -0.9(6)   | C(24)-P(2)-C(31)-C(32)  | 130.6(4)  |
| C(15)-C(16)-C(17)-N(1)  | 3.1(6)    | O(2)-P(2)-C(31)-C(36)   | -167.8(4) |
| C(18)-C(16)-C(17)-N(1)  | -175.4(4) | C(25)-P(2)-C(31)-C(36)  | 65.5(4)   |
| C(15)-C(16)-C(17)-C(21) | -178.6(4) | C(24)-P(2)-C(31)-C(36)  | -46.3(4)  |
| C(18)-C(16)-C(17)-C(21) | 3.0(6)    | C(36)-C(31)-C(32)-C(33) | 1.6(7)    |
| C(15)-C(16)-C(18)-C(19) | -179.3(4) | P(2)-C(31)-C(32)-C(33)  | -175.4(4) |
| C(17)-C(16)-C(18)-C(19) | -0.9(7)   | C(31)-C(32)-C(33)-C(34) | -0.9(7)   |



|                         |         |                         |          |
|-------------------------|---------|-------------------------|----------|
| C(32)-C(33)-C(34)-C(35) | -1.0(7) | P(2)-C(31)-C(36)-C(35)  | 176.3(3) |
| C(33)-C(34)-C(35)-C(36) | 2.1(7)  | C(34)-C(35)-C(36)-C(31) | -1.3(7)  |
| C(32)-C(31)-C(36)-C(35) | -0.5(7) |                         |          |

---

Symmetry transformations used to generate equivalent atoms:

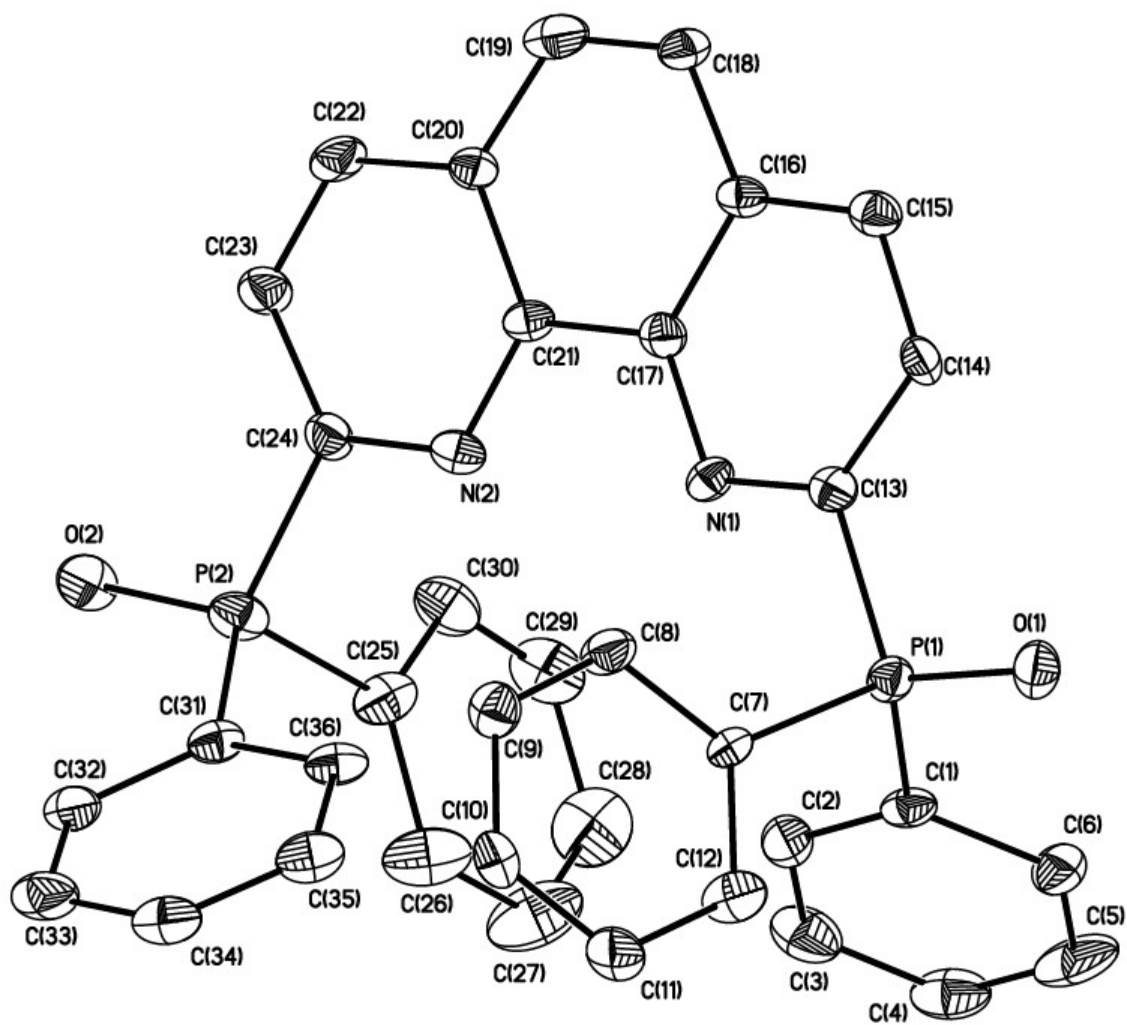

**Figure 8** The general view of PnPPO in the representation of non-hydrogen atoms as probability ellipsoids of atomic displacements ( $p=0.5$ ). Hydrogen atoms are omitted for clarity.

## Structure of DPPOGd(NO<sub>3</sub>)<sub>3</sub>

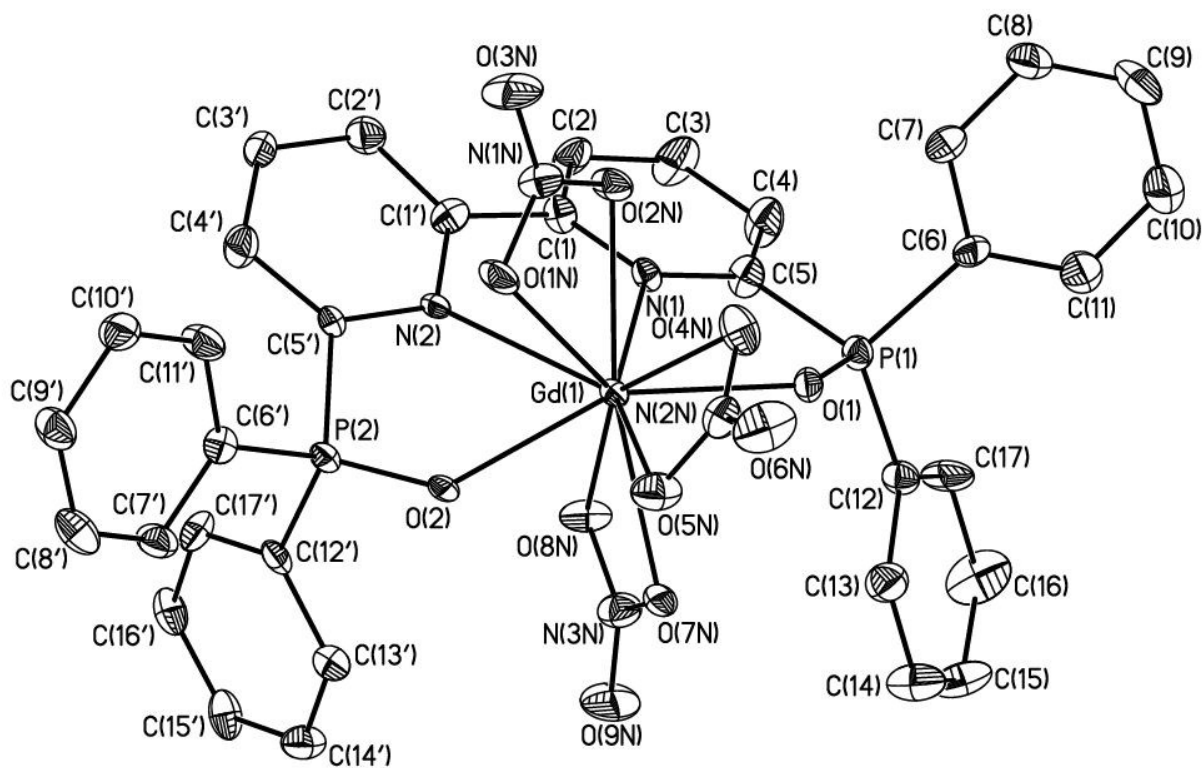

Figure 9 General view of one of the two independent molecules in DPPOGd(NO<sub>3</sub>)<sub>3</sub> with atoms given as thermal ellipsoids (p=50%). Hydrogen atoms are omitted for clarity.

**Table 27 Crystal data and structure refinement for DPPOGd(NO<sub>3</sub>)<sub>3</sub>.**

|                                                 |                                                                                  |                           |
|-------------------------------------------------|----------------------------------------------------------------------------------|---------------------------|
| Identification code                             | DPPOGd(NO <sub>3</sub> ) <sub>3</sub>                                            |                           |
| Empirical formula                               | C <sub>34</sub> H <sub>26</sub> Gd N <sub>5</sub> O <sub>11</sub> P <sub>2</sub> |                           |
| Formula weight                                  | 899.79                                                                           |                           |
| Temperature                                     | 120(2) K                                                                         |                           |
| Wavelength                                      | 0.71073 Å                                                                        |                           |
| Crystal system                                  | Monoclinic                                                                       |                           |
| Space group                                     | P2 <sub>1</sub> /c                                                               |                           |
| Unit cell dimensions                            | a = 20.593(2) Å                                                                  | α = 90°.                  |
|                                                 | b = 17.456(2) Å                                                                  | β = 90.195(3)°.           |
|                                                 | c = 19.150(2) Å                                                                  | γ = 90°.                  |
| Volume                                          | 6883.7(14) Å <sup>3</sup>                                                        |                           |
| Z                                               | 8                                                                                |                           |
| Density (calculated)                            | 1.736 Mg/m <sup>3</sup>                                                          |                           |
| Absorption coefficient                          | 2.090 mm <sup>-1</sup>                                                           |                           |
| F(000)                                          | 3576                                                                             |                           |
| Crystal size                                    | 0.350 x 0.050 x 0.050 mm <sup>3</sup>                                            |                           |
| Theta range for data collection                 | 0.989 to 27.000°.                                                                |                           |
| Index ranges                                    | -26 ≤ h ≤ 26, -22 ≤ k ≤ 22, -24 ≤ l ≤ 24                                         |                           |
| Reflections collected                           | 71003                                                                            |                           |
| Independent reflections                         | 15030 [R(int) = 0.1374]                                                          |                           |
| Completeness to theta = 25.242°                 | 100.0 %                                                                          |                           |
| Refinement method                               | Full-matrix least-squares on F <sup>2</sup>                                      |                           |
| Data / restraints / parameters                  | 15030 / 0 / 955                                                                  |                           |
| Goodness-of-fit on F <sup>2</sup>               | 1.020                                                                            |                           |
| Final R indices [for 10163 rfln with I > 2σ(I)] |                                                                                  | R1 = 0.0575, wR2 = 0.1198 |
| R indices (all data)                            | R1 = 0.0992, wR2 = 0.1401                                                        |                           |
| Extinction coefficient                          | n/a                                                                              |                           |
| Largest diff. peak and hole                     | 2.305 and -2.709 e. Å <sup>-3</sup>                                              |                           |

**Table 28 Atomic coordinates ( $\times 10^4$ ) and equivalent isotropic displacement parameters ( $\text{\AA}^2 \times 10^3$ ) for DPPOGd(NO<sub>3</sub>)<sub>3</sub>. U(eq) is defined as one third of the trace of the orthogonalized  $U^{ij}$  tensor.**

|        | x        | y        | z       | U(eq) |
|--------|----------|----------|---------|-------|
| Gd(1)  | 3487(1)  | 9262(1)  | 2885(1) | 12(1) |
| Gd(2)  | -1538(1) | 9137(1)  | 2180(1) | 12(1) |
| P(1)   | 2730(1)  | 9801(1)  | 1292(1) | 15(1) |
| O(1)   | 2955(2)  | 10015(3) | 2013(2) | 16(1) |
| P(2)   | 4586(1)  | 8040(1)  | 3693(1) | 15(1) |
| O(2)   | 4394(2)  | 8857(3)  | 3543(3) | 17(1) |
| N(1)   | 2927(3)  | 8435(3)  | 1849(3) | 14(1) |
| N(2)   | 3606(3)  | 7741(3)  | 2871(3) | 12(1) |
| C(1')  | 3163(4)  | 7310(4)  | 2533(4) | 17(2) |
| C(1)   | 2891(3)  | 7662(4)  | 1894(4) | 16(2) |
| C(2')  | 3000(4)  | 6585(4)  | 2758(4) | 22(2) |
| C(2)   | 2633(4)  | 7218(4)  | 1361(4) | 23(2) |
| C(3')  | 3327(4)  | 6265(4)  | 3323(4) | 23(2) |
| C(3)   | 2408(4)  | 7568(4)  | 755(4)  | 29(2) |
| C(4')  | 3820(4)  | 6675(4)  | 3638(4) | 22(2) |
| C(4)   | 2443(4)  | 8352(4)  | 703(4)  | 27(2) |
| C(5)   | 2700(4)  | 8757(4)  | 1258(4) | 19(2) |
| C(5')  | 3936(3)  | 7418(4)  | 3403(4) | 18(2) |
| C(6')  | 4743(3)  | 7830(4)  | 4595(4) | 16(2) |
| C(6)   | 1913(4)  | 10081(4) | 1100(4) | 20(2) |
| C(7')  | 5371(4)  | 7911(4)  | 4861(4) | 23(2) |
| C(7)   | 1425(4)  | 9760(5)  | 1505(4) | 26(2) |
| C(8')  | 5490(4)  | 7757(5)  | 5558(4) | 28(2) |
| C(8)   | 782(4)   | 9943(5)  | 1384(5) | 35(2) |
| C(9')  | 5009(4)  | 7489(5)  | 5984(4) | 25(2) |
| C(9)   | 617(4)   | 10434(5) | 851(5)  | 37(2) |
| C(10)  | 1102(4)  | 10751(5) | 442(5)  | 38(2) |
| C(10') | 4373(4)  | 7413(5)  | 5728(4) | 26(2) |
| C(11') | 4249(4)  | 7600(5)  | 5035(4) | 24(2) |
| C(11)  | 1741(4)  | 10578(5) | 571(4)  | 29(2) |
| C(12') | 5273(3)  | 7774(4)  | 3179(4) | 16(2) |
| C(12)  | 3277(3)  | 10161(4) | 644(4)  | 17(2) |
| C(13)  | 3801(4)  | 10590(4) | 881(4)  | 26(2) |
| C(13') | 5649(4)  | 8374(4)  | 2921(4) | 21(2) |
| C(14') | 6168(4)  | 8216(5)  | 2482(4) | 26(2) |
| C(14)  | 4249(4)  | 10877(5) | 418(5)  | 33(2) |
| C(15)  | 4174(4)  | 10756(5) | -281(5) | 33(2) |
| C(15') | 6291(4)  | 7476(4)  | 2284(4) | 22(2) |
| C(16') | 5929(4)  | 6881(5)  | 2534(4) | 22(2) |
| C(16)  | 3655(5)  | 10352(5) | -528(4) | 40(2) |
| C(17') | 5410(4)  | 7027(4)  | 2977(4) | 20(2) |
| C(17)  | 3204(4)  | 10046(5) | -69(4)  | 27(2) |
| P(1A)  | -336(1)  | 7912(1)  | 1591(1) | 17(1) |
| O(1A)  | -540(2)  | 8718(3)  | 1734(3) | 19(1) |
| P(2A)  | -2398(1) | 9769(1)  | 3650(1) | 15(1) |
| O(2A)  | -2172(2) | 9953(3)  | 2920(2) | 16(1) |
| N(1A)  | -1393(3) | 7626(3)  | 2313(3) | 17(1) |

|        |          |          |         |       |
|--------|----------|----------|---------|-------|
| N(2A)  | -2173(3) | 8365(3)  | 3191(3) | 16(1) |
| C(1A)  | -1841(3) | 7196(4)  | 2643(4) | 18(2) |
| C(1")  | -2237(3) | 7600(4)  | 3170(4) | 14(1) |
| C(2A)  | -1914(4) | 6426(4)  | 2507(4) | 23(2) |
| C(2")  | -2608(4) | 7195(4)  | 3645(4) | 20(2) |
| C(3")  | -2918(4) | 7588(5)  | 4179(4) | 25(2) |
| C(3A)  | -1464(4) | 6061(4)  | 2095(4) | 27(2) |
| C(4A)  | -964(4)  | 6475(5)  | 1803(4) | 27(2) |
| C(4")  | -2861(4) | 8375(4)  | 4209(4) | 21(2) |
| C(5")  | -2488(4) | 8733(4)  | 3707(4) | 17(2) |
| C(5A)  | -955(3)  | 7267(4)  | 1908(4) | 18(2) |
| C(6")  | -3195(4) | 10140(4) | 3840(4) | 18(2) |
| C(6A)  | -203(4)  | 7707(4)  | 692(4)  | 20(2) |
| C(7")  | -3389(4) | 10280(4) | 4524(4) | 22(2) |
| C(7A)  | -658(4)  | 7303(5)  | 295(4)  | 33(2) |
| C(8A)  | -559(5)  | 7205(5)  | -418(5) | 39(2) |
| C(8")  | -4028(4) | 10463(5) | 4663(5) | 29(2) |
| C(9")  | -4464(4) | 10506(5) | 4119(5) | 30(2) |
| C(9A)  | -17(4)   | 7516(6)  | -730(5) | 38(2) |
| C(10") | -4275(4) | 10410(5) | 3445(4) | 27(2) |
| C(10A) | 434(5)   | 7923(5)  | -340(5) | 38(2) |
| C(11A) | 339(4)   | 8027(5)  | 374(4)  | 27(2) |
| C(11") | -3641(4) | 10208(4) | 3296(4) | 26(2) |
| C(12A) | 371(4)   | 7696(4)  | 2095(4) | 21(2) |
| C(12") | -1832(3) | 10092(4) | 4296(4) | 17(2) |
| C(13") | -1463(4) | 10722(4) | 4127(4) | 25(2) |
| C(13A) | 644(4)   | 6957(4)  | 2112(4) | 26(2) |
| C(14A) | 1147(4)  | 6804(5)  | 2580(4) | 28(2) |
| C(14") | -1000(4) | 11002(5) | 4598(4) | 33(2) |
| C(15") | -900(4)  | 10630(5) | 5212(4) | 31(2) |
| C(15A) | 1384(4)  | 7350(4)  | 3019(4) | 23(2) |
| C(16A) | 1102(4)  | 8083(5)  | 3012(4) | 27(2) |
| C(16") | -1268(5) | 10003(6) | 5388(5) | 43(3) |
| C(17A) | 600(4)   | 8243(5)  | 2558(4) | 26(2) |
| C(17") | -1744(5) | 9729(5)  | 4934(4) | 36(2) |
| N(3N)  | 4620(3)  | 9577(4)  | 2020(3) | 23(2) |
| O(2N)  | 2444(2)  | 8684(3)  | 3216(3) | 21(1) |
| O(7N)  | 4402(2)  | 10065(3) | 2445(3) | 18(1) |
| O(8NA) | -869(2)  | 9022(3)  | 3247(3) | 23(1) |
| O(5NA) | -1145(3) | 10120(3) | 1288(3) | 27(1) |
| O(4NA) | -2178(3) | 10066(3) | 1460(3) | 26(1) |
| O(8N)  | 4272(2)  | 8963(3)  | 1947(3) | 22(1) |
| O(7NA) | -720(2)  | 10060(3) | 2663(3) | 20(1) |
| N(1N)  | 2573(3)  | 8566(4)  | 3846(3) | 21(1) |
| O(4N)  | 2737(3)  | 10217(3) | 3467(3) | 27(1) |
| N(2NA) | -1702(4) | 10377(4) | 1136(3) | 26(2) |
| O(1NA) | -2544(2) | 8527(3)  | 1747(3) | 20(1) |
| O(5N)  | 3753(3)  | 10360(3) | 3658(3) | 28(1) |
| O(2NA) | -1750(2) | 8545(3)  | 1011(3) | 22(1) |
| N(2N)  | 3182(3)  | 10593(4) | 3772(3) | 21(1) |
| O(1N)  | 3144(2)  | 8759(3)  | 4050(3) | 22(1) |
| O(6NA) | -1782(3) | 10885(3) | 711(3)  | 38(2) |
| N(1NA) | -2344(3) | 8367(4)  | 1143(3) | 22(2) |
| O(9NA) | -76(3)   | 9794(4)  | 3532(3) | 38(2) |

|        |          |          |         |       |
|--------|----------|----------|---------|-------|
| N(3NA) | -534(3)  | 9626(4)  | 3155(3) | 26(2) |
| O(9N)  | 5129(3)  | 9666(4)  | 1711(3) | 36(2) |
| O(3N)  | 2180(3)  | 8292(4)  | 4253(3) | 35(2) |
| O(6N)  | 3058(3)  | 11142(3) | 4151(3) | 38(2) |
| O(3NA) | -2691(3) | 8066(4)  | 702(3)  | 38(2) |

---

**Table 29 Bond lengths [Å] and angles [°] for DPPOGd(NO3)3.**

|              |           |               |           |
|--------------|-----------|---------------|-----------|
| Gd(1)-O(2)   | 2.359(5)  | C(4)-C(5)     | 1.381(10) |
| Gd(1)-O(1)   | 2.388(5)  | C(4)-H(4A)    | 0.9500    |
| Gd(1)-O(2N)  | 2.457(5)  | C(6')-C(11')  | 1.383(10) |
| Gd(1)-O(8N)  | 2.477(5)  | C(6')-C(7')   | 1.394(10) |
| Gd(1)-O(5N)  | 2.482(5)  | C(6)-C(11)    | 1.379(11) |
| Gd(1)-O(7N)  | 2.498(5)  | C(6)-C(7)     | 1.389(10) |
| Gd(1)-O(1N)  | 2.501(5)  | C(7')-C(8')   | 1.383(11) |
| Gd(1)-O(4N)  | 2.533(5)  | C(7')-H(7'A)  | 0.9500    |
| Gd(1)-N(2)   | 2.665(5)  | C(7)-C(8)     | 1.382(11) |
| Gd(1)-N(1)   | 2.708(6)  | C(7)-H(7A)    | 0.9500    |
| Gd(1)-N(1N)  | 2.903(6)  | C(8')-C(9')   | 1.367(11) |
| Gd(1)-N(3N)  | 2.920(6)  | C(8')-H(8'A)  | 0.9500    |
| Gd(2)-O(1A)  | 2.346(5)  | C(8)-C(9)     | 1.374(12) |
| Gd(2)-O(2A)  | 2.399(5)  | C(8)-H(8A)    | 0.9500    |
| Gd(2)-O(8NA) | 2.469(5)  | C(9')-C(10')  | 1.403(11) |
| Gd(2)-O(1NA) | 2.469(5)  | C(9')-H(9'A)  | 0.9500    |
| Gd(2)-O(4NA) | 2.501(5)  | C(9)-C(10)    | 1.386(12) |
| Gd(2)-O(2NA) | 2.502(5)  | C(9)-H(9A)    | 0.9500    |
| Gd(2)-O(7NA) | 2.507(5)  | C(10)-C(11)   | 1.370(11) |
| Gd(2)-O(5NA) | 2.555(5)  | C(10)-H(10A)  | 0.9500    |
| Gd(2)-N(1A)  | 2.666(6)  | C(10')-C(11') | 1.391(10) |
| Gd(2)-N(2A)  | 2.700(6)  | C(10')-H(10B) | 0.9500    |
| Gd(2)-N(3NA) | 2.909(6)  | C(11')-H(11A) | 0.9500    |
| Gd(2)-N(1NA) | 2.911(6)  | C(11)-H(11B)  | 0.9500    |
| P(1)-O(1)    | 1.503(5)  | C(12')-C(17') | 1.390(9)  |
| P(1)-C(6)    | 1.789(8)  | C(12')-C(13') | 1.395(10) |
| P(1)-C(12)   | 1.792(8)  | C(12)-C(17)   | 1.387(10) |
| P(1)-C(5)    | 1.824(7)  | C(12)-C(13)   | 1.389(10) |
| P(2)-O(2)    | 1.507(5)  | C(13)-C(14)   | 1.376(11) |
| P(2)-C(12')  | 1.789(7)  | C(13)-H(13A)  | 0.9500    |
| P(2)-C(6')   | 1.795(7)  | C(13')-C(14') | 1.390(11) |
| P(2)-C(5')   | 1.809(7)  | C(13')-H(13B) | 0.9500    |
| N(1)-C(5)    | 1.346(9)  | C(14')-C(15') | 1.369(11) |
| N(1)-C(1)    | 1.353(9)  | C(14')-H(14A) | 0.9500    |
| N(2)-C(1')   | 1.347(9)  | C(14)-C(15)   | 1.363(12) |
| N(2)-C(5')   | 1.347(9)  | C(14)-H(14B)  | 0.9500    |
| C(1')-C(2')  | 1.379(10) | C(15)-C(16)   | 1.364(12) |
| C(1')-C(1)   | 1.479(10) | C(15)-H(15A)  | 0.9500    |
| C(1)-C(2)    | 1.385(10) | C(15')-C(16') | 1.367(11) |
| C(2')-C(3')  | 1.390(10) | C(15')-H(15B) | 0.9500    |
| C(2')-H(2'A) | 0.9500    | C(16')-C(17') | 1.390(10) |
| C(2)-C(3)    | 1.391(10) | C(16')-H(16A) | 0.9500    |
| C(2)-H(2A)   | 0.9500    | C(16)-C(17)   | 1.387(11) |
| C(3')-C(4')  | 1.380(10) | C(16)-H(16B)  | 0.9500    |
| C(3')-H(3'A) | 0.9500    | C(17')-H(17A) | 0.9500    |
| C(3)-C(4)    | 1.375(10) | C(17)-H(17B)  | 0.9500    |
| C(3)-H(3A)   | 0.9500    | P(1A)-O(1A)   | 1.494(5)  |
| C(4')-C(5')  | 1.395(10) | P(1A)-C(6A)   | 1.780(8)  |
| C(4')-H(4'A) | 0.9500    | P(1A)-C(12A)  | 1.783(8)  |



|                                           |           |                                           |            |
|-------------------------------------------|-----------|-------------------------------------------|------------|
| P(1A)-C(5A)                               | 1.807(7)  | C(14A)-C(15A)                             | 1.360(11)  |
| P(2A)-O(2A)                               | 1.509(5)  | C(14A)-H(14C)                             | 0.9500     |
| P(2A)-C(12 <sup>''</sup> )                | 1.788(7)  | C(14 <sup>''</sup> )-C(15 <sup>''</sup> ) | 1.359(12)  |
| P(2A)-C(6 <sup>''</sup> )                 | 1.802(7)  | C(14 <sup>''</sup> )-H(14D)               | 0.9500     |
| P(2A)-C(5 <sup>''</sup> )                 | 1.820(7)  | C(15 <sup>''</sup> )-C(16 <sup>''</sup> ) | 1.373(12)  |
| N(1A)-C(5A)                               | 1.348(9)  | C(15 <sup>''</sup> )-H(15C)               | 0.9500     |
| N(1A)-C(1A)                               | 1.348(9)  | C(15A)-C(16A)                             | 1.406(11)  |
| N(2A)-C(1 <sup>''</sup> )                 | 1.342(9)  | C(15A)-H(15D)                             | 0.9500     |
| N(2A)-C(5 <sup>''</sup> )                 | 1.348(9)  | C(16A)-C(17A)                             | 1.375(11)  |
| C(1A)-C(2A)                               | 1.376(10) | C(16A)-H(16C)                             | 0.9500     |
| C(1A)-C(1 <sup>''</sup> )                 | 1.480(10) | C(16 <sup>''</sup> )-C(17 <sup>''</sup> ) | 1.393(12)  |
| C(1 <sup>''</sup> )-C(2 <sup>''</sup> )   | 1.384(10) | C(16 <sup>''</sup> )-H(16D)               | 0.9500     |
| C(2A)-C(3A)                               | 1.375(11) | C(17A)-H(17C)                             | 0.9500     |
| C(2A)-H(2AA)                              | 0.9500    | C(17 <sup>''</sup> )-H(17D)               | 0.9500     |
| C(2 <sup>''</sup> )-C(3 <sup>''</sup> )   | 1.388(10) | N(3N)-O(9N)                               | 1.213(8)   |
| C(2 <sup>''</sup> )-H(2 <sup>''</sup> A)  | 0.9500    | N(3N)-O(7N)                               | 1.262(8)   |
| C(3 <sup>''</sup> )-C(4 <sup>''</sup> )   | 1.380(11) | N(3N)-O(8N)                               | 1.296(8)   |
| C(3 <sup>''</sup> )-H(3 <sup>''</sup> A)  | 0.9500    | O(2N)-N(1N)                               | 1.251(7)   |
| C(3A)-C(4A)                               | 1.378(11) | O(8NA)-N(3NA)                             | 1.272(8)   |
| C(3A)-H(3AA)                              | 0.9500    | O(5NA)-N(2NA)                             | 1.265(8)   |
| C(4A)-C(5A)                               | 1.397(10) | O(4NA)-N(2NA)                             | 1.284(8)   |
| C(4A)-H(4AA)                              | 0.9500    | O(7NA)-N(3NA)                             | 1.268(8)   |
| C(4 <sup>''</sup> )-C(5 <sup>''</sup> )   | 1.383(10) | N(1N)-O(3N)                               | 1.223(8)   |
| C(4 <sup>''</sup> )-H(4 <sup>''</sup> A)  | 0.9500    | N(1N)-O(1N)                               | 1.282(8)   |
| C(6 <sup>''</sup> )-C(11 <sup>''</sup> )  | 1.392(10) | O(4N)-N(2N)                               | 1.267(8)   |
| C(6 <sup>''</sup> )-C(7 <sup>''</sup> )   | 1.393(10) | N(2NA)-O(6NA)                             | 1.214(8)   |
| C(6A)-C(11A)                              | 1.391(11) | O(1NA)-N(1NA)                             | 1.262(8)   |
| C(6A)-C(7A)                               | 1.395(11) | O(5N)-N(2N)                               | 1.264(8)   |
| C(7 <sup>''</sup> )-C(8 <sup>''</sup> )   | 1.382(11) | O(2NA)-N(1NA)                             | 1.286(8)   |
| C(7 <sup>''</sup> )-H(7 <sup>''</sup> A)  | 0.9500    | N(2N)-O(6N)                               | 1.229(8)   |
| C(7A)-C(8A)                               | 1.392(11) | N(1NA)-O(3NA)                             | 1.223(8)   |
| C(7A)-H(7AA)                              | 0.9500    | O(9NA)-N(3NA)                             | 1.223(8)   |
| C(8A)-C(9A)                               | 1.379(13) | O(2)-Gd(1)-O(1)                           | 154.03(16) |
| C(8A)-H(8AA)                              | 0.9500    | O(2)-Gd(1)-O(2N)                          | 115.48(16) |
| C(8 <sup>''</sup> )-C(9 <sup>''</sup> )   | 1.375(12) | O(1)-Gd(1)-O(2N)                          | 90.45(16)  |
| C(8 <sup>''</sup> )-H(8 <sup>''</sup> A)  | 0.9500    | O(2)-Gd(1)-O(8N)                          | 78.84(18)  |
| C(9 <sup>''</sup> )-C(10 <sup>''</sup> )  | 1.360(12) | O(1)-Gd(1)-O(8N)                          | 84.71(17)  |
| C(9 <sup>''</sup> )-H(9 <sup>''</sup> A)  | 0.9500    | O(2N)-Gd(1)-O(8N)                         | 132.41(17) |
| C(9A)-C(10A)                              | 1.387(12) | O(2)-Gd(1)-O(5N)                          | 74.90(18)  |
| C(9A)-H(9AA)                              | 0.9500    | O(1)-Gd(1)-O(5N)                          | 95.24(18)  |
| C(10 <sup>''</sup> )-C(11 <sup>''</sup> ) | 1.383(11) | O(2N)-Gd(1)-O(5N)                         | 110.76(17) |
| C(10 <sup>''</sup> )-H(10C)               | 0.9500    | O(8N)-Gd(1)-O(5N)                         | 116.82(17) |
| C(10A)-C(11A)                             | 1.394(11) | O(2)-Gd(1)-O(7N)                          | 75.54(16)  |
| C(10A)-H(10D)                             | 0.9500    | O(1)-Gd(1)-O(7N)                          | 78.49(16)  |
| C(11A)-H(11C)                             | 0.9500    | O(2N)-Gd(1)-O(7N)                         | 168.12(16) |
| C(11 <sup>''</sup> )-H(11D)               | 0.9500    | O(8N)-Gd(1)-O(7N)                         | 51.54(16)  |
| C(12A)-C(17A)                             | 1.386(11) | O(5N)-Gd(1)-O(7N)                         | 66.54(17)  |
| C(12A)-C(13A)                             | 1.408(10) | O(2)-Gd(1)-O(1N)                          | 69.13(16)  |
| C(12 <sup>''</sup> )-C(13 <sup>''</sup> ) | 1.377(10) | O(1)-Gd(1)-O(1N)                          | 133.37(16) |
| C(12 <sup>''</sup> )-C(17 <sup>''</sup> ) | 1.388(11) | O(2N)-Gd(1)-O(1N)                         | 51.38(16)  |
| C(13 <sup>''</sup> )-C(14 <sup>''</sup> ) | 1.397(11) | O(8N)-Gd(1)-O(1N)                         | 139.47(17) |
| C(13 <sup>''</sup> )-H(13C)               | 0.9500    | O(5N)-Gd(1)-O(1N)                         | 78.57(18)  |
| C(13A)-C(14A)                             | 1.394(11) | O(7N)-Gd(1)-O(1N)                         | 135.48(16) |
| C(13A)-H(13D)                             | 0.9500    | O(2)-Gd(1)-O(4N)                          | 116.38(17) |

|                     |            |                     |            |
|---------------------|------------|---------------------|------------|
| O(1)-Gd(1)-O(4N)    | 70.55(16)  | O(1A)-Gd(2)-O(2NA)  | 72.33(17)  |
| O(2N)-Gd(1)-O(4N)   | 67.81(18)  | O(2A)-Gd(2)-O(2NA)  | 132.86(16) |
| O(8N)-Gd(1)-O(4N)   | 149.11(18) | O(8NA)-Gd(2)-O(2NA) | 143.33(17) |
| O(5N)-Gd(1)-O(4N)   | 50.42(18)  | O(1NA)-Gd(2)-O(2NA) | 51.57(17)  |
| O(7N)-Gd(1)-O(4N)   | 103.94(17) | O(4NA)-Gd(2)-O(2NA) | 71.62(17)  |
| O(1N)-Gd(1)-O(4N)   | 70.37(17)  | O(1A)-Gd(2)-O(7NA)  | 75.27(17)  |
| O(2)-Gd(1)-N(2)     | 68.55(16)  | O(2A)-Gd(2)-O(7NA)  | 76.47(16)  |
| O(1)-Gd(1)-N(2)     | 125.70(16) | O(8NA)-Gd(2)-O(7NA) | 51.26(16)  |
| O(2N)-Gd(1)-N(2)    | 70.99(17)  | O(1NA)-Gd(2)-O(7NA) | 164.38(17) |
| O(8N)-Gd(1)-N(2)    | 73.94(17)  | O(4NA)-Gd(2)-O(7NA) | 97.99(18)  |
| O(5N)-Gd(1)-N(2)    | 138.99(18) | O(2NA)-Gd(2)-O(7NA) | 135.32(17) |
| O(7N)-Gd(1)-N(2)    | 119.07(16) | O(1A)-Gd(2)-O(5NA)  | 71.67(18)  |
| O(1N)-Gd(1)-N(2)    | 71.66(17)  | O(2A)-Gd(2)-O(5NA)  | 99.81(17)  |
| O(4N)-Gd(1)-N(2)    | 135.70(18) | O(8NA)-Gd(2)-O(5NA) | 115.49(17) |
| O(2)-Gd(1)-N(1)     | 124.50(17) | O(1NA)-Gd(2)-O(5NA) | 109.48(17) |
| O(1)-Gd(1)-N(1)     | 65.70(17)  | O(4NA)-Gd(2)-O(5NA) | 50.50(17)  |
| O(2N)-Gd(1)-N(1)    | 66.45(17)  | O(2NA)-Gd(2)-O(5NA) | 74.62(17)  |
| O(8N)-Gd(1)-N(1)    | 68.53(17)  | O(7NA)-Gd(2)-O(5NA) | 66.44(17)  |
| O(5N)-Gd(1)-N(1)    | 160.27(18) | O(1A)-Gd(2)-N(1A)   | 68.19(17)  |
| O(7N)-Gd(1)-N(1)    | 111.86(17) | O(2A)-Gd(2)-N(1A)   | 126.28(17) |
| O(1N)-Gd(1)-N(1)    | 110.21(17) | O(8NA)-Gd(2)-N(1A)  | 77.16(17)  |
| O(4N)-Gd(1)-N(1)    | 114.53(17) | O(1NA)-Gd(2)-N(1A)  | 72.53(17)  |
| N(2)-Gd(1)-N(1)     | 60.06(17)  | O(4NA)-Gd(2)-N(1A)  | 138.86(18) |
| O(2)-Gd(1)-N(1N)    | 92.86(17)  | O(2NA)-Gd(2)-N(1A)  | 72.35(17)  |
| O(1)-Gd(1)-N(1N)    | 112.15(17) | O(7NA)-Gd(2)-N(1A)  | 121.69(17) |
| O(2N)-Gd(1)-N(1N)   | 25.28(16)  | O(5NA)-Gd(2)-N(1A)  | 133.86(18) |
| O(8N)-Gd(1)-N(1N)   | 142.99(17) | O(1A)-Gd(2)-N(2A)   | 122.19(17) |
| O(5N)-Gd(1)-N(1N)   | 95.00(18)  | O(2A)-Gd(2)-N(2A)   | 66.85(17)  |
| O(7N)-Gd(1)-N(1N)   | 160.04(17) | O(8NA)-Gd(2)-N(2A)  | 68.63(17)  |
| O(1N)-Gd(1)-N(1N)   | 26.11(16)  | O(1NA)-Gd(2)-N(2A)  | 67.52(17)  |
| O(4N)-Gd(1)-N(1N)   | 66.33(18)  | O(4NA)-Gd(2)-N(2A)  | 117.60(17) |
| N(2)-Gd(1)-N(1N)    | 69.49(17)  | O(2NA)-Gd(2)-N(2A)  | 110.60(17) |
| N(1)-Gd(1)-N(1N)    | 88.08(17)  | O(7NA)-Gd(2)-N(2A)  | 112.48(17) |
| O(2)-Gd(1)-N(3N)    | 74.10(17)  | O(5NA)-Gd(2)-N(2A)  | 165.91(18) |
| O(1)-Gd(1)-N(3N)    | 82.25(17)  | N(1A)-Gd(2)-N(2A)   | 59.47(18)  |
| O(2N)-Gd(1)-N(3N)   | 157.67(18) | O(1A)-Gd(2)-N(3NA)  | 72.75(18)  |
| O(8N)-Gd(1)-N(3N)   | 26.18(16)  | O(2A)-Gd(2)-N(3NA)  | 80.37(18)  |
| O(5N)-Gd(1)-N(3N)   | 90.98(18)  | O(8NA)-Gd(2)-N(3NA) | 25.74(17)  |
| O(7N)-Gd(1)-N(3N)   | 25.45(16)  | O(1NA)-Gd(2)-N(3NA) | 159.23(18) |
| O(1N)-Gd(1)-N(3N)   | 143.21(17) | O(4NA)-Gd(2)-N(3NA) | 122.39(19) |
| O(4N)-Gd(1)-N(3N)   | 127.98(18) | O(2NA)-Gd(2)-N(3NA) | 144.79(18) |
| N(2)-Gd(1)-N(3N)    | 96.22(18)  | O(7NA)-Gd(2)-N(3NA) | 25.72(16)  |
| N(1)-Gd(1)-N(3N)    | 91.38(18)  | O(5NA)-Gd(2)-N(3NA) | 90.32(18)  |
| N(1N)-Gd(1)-N(3N)   | 163.73(18) | N(1A)-Gd(2)-N(3NA)  | 98.57(18)  |
| O(1A)-Gd(2)-O(2A)   | 151.55(17) | N(2A)-Gd(2)-N(3NA)  | 91.74(18)  |
| O(1A)-Gd(2)-O(8NA)  | 77.81(17)  | O(1A)-Gd(2)-N(1NA)  | 96.09(18)  |
| O(2A)-Gd(2)-O(8NA)  | 82.06(17)  | O(2A)-Gd(2)-N(1NA)  | 111.56(18) |
| O(1A)-Gd(2)-O(1NA)  | 118.63(17) | O(8NA)-Gd(2)-N(1NA) | 147.35(17) |
| O(2A)-Gd(2)-O(1NA)  | 89.82(17)  | O(1NA)-Gd(2)-N(1NA) | 25.47(17)  |
| O(8NA)-Gd(2)-O(1NA) | 135.02(17) | O(4NA)-Gd(2)-N(1NA) | 67.99(18)  |
| O(1A)-Gd(2)-O(4NA)  | 117.54(17) | O(2NA)-Gd(2)-N(1NA) | 26.11(17)  |
| O(2A)-Gd(2)-O(4NA)  | 69.76(17)  | O(7NA)-Gd(2)-N(1NA) | 158.31(17) |
| O(8NA)-Gd(2)-O(4NA) | 143.18(18) | O(5NA)-Gd(2)-N(1NA) | 92.04(17)  |
| O(1NA)-Gd(2)-O(4NA) | 69.81(18)  | N(1A)-Gd(2)-N(1NA)  | 70.91(18)  |

|                     |            |                      |          |
|---------------------|------------|----------------------|----------|
| N(2A)-Gd(2)-N(1NA)  | 89.02(17)  | C(7')-C(6')-P(2)     | 119.7(6) |
| N(3NA)-Gd(2)-N(1NA) | 167.21(19) | C(11)-C(6)-C(7)      | 118.6(8) |
| O(1)-P(1)-C(6)      | 114.1(3)   | C(11)-C(6)-P(1)      | 124.2(6) |
| O(1)-P(1)-C(12)     | 110.9(3)   | C(7)-C(6)-P(1)       | 117.2(6) |
| C(6)-P(1)-C(12)     | 110.7(3)   | C(8')-C(7')-C(6')    | 119.6(7) |
| O(1)-P(1)-C(5)      | 106.9(3)   | C(8')-C(7')-H(7'A)   | 120.2    |
| C(6)-P(1)-C(5)      | 103.5(3)   | C(6')-C(7')-H(7'A)   | 120.2    |
| C(12)-P(1)-C(5)     | 110.3(3)   | C(8)-C(7)-C(6)       | 120.5(8) |
| P(1)-O(1)-Gd(1)     | 130.2(3)   | C(8)-C(7)-H(7A)      | 119.7    |
| O(2)-P(2)-C(12')    | 110.4(3)   | C(6)-C(7)-H(7A)      | 119.7    |
| O(2)-P(2)-C(6')     | 115.1(3)   | C(9')-C(8')-C(7')    | 121.0(7) |
| C(12')-P(2)-C(6')   | 109.6(3)   | C(9')-C(8')-H(8'A)   | 119.5    |
| O(2)-P(2)-C(5')     | 108.4(3)   | C(7')-C(8')-H(8'A)   | 119.5    |
| C(12')-P(2)-C(5')   | 105.1(3)   | C(9)-C(8)-C(7)       | 120.2(8) |
| C(6')-P(2)-C(5')    | 107.7(3)   | C(9)-C(8)-H(8A)      | 119.9    |
| P(2)-O(2)-Gd(1)     | 126.3(3)   | C(7)-C(8)-H(8A)      | 119.9    |
| C(5)-N(1)-C(1)      | 116.8(6)   | C(8')-C(9')-C(10')   | 120.1(7) |
| C(5)-N(1)-Gd(1)     | 122.5(4)   | C(8')-C(9')-H(9'A)   | 119.9    |
| C(1)-N(1)-Gd(1)     | 120.6(4)   | C(10')-C(9')-H(9'A)  | 119.9    |
| C(1')-N(2)-C(5')    | 118.0(6)   | C(8)-C(9)-C(10)      | 119.4(8) |
| C(1')-N(2)-Gd(1)    | 120.0(4)   | C(8)-C(9)-H(9A)      | 120.3    |
| C(5')-N(2)-Gd(1)    | 117.1(4)   | C(10)-C(9)-H(9A)     | 120.3    |
| N(2)-C(1')-C(2')    | 121.9(7)   | C(11)-C(10)-C(9)     | 120.3(8) |
| N(2)-C(1')-C(1)     | 114.8(6)   | C(11)-C(10)-H(10A)   | 119.9    |
| C(2')-C(1')-C(1)    | 123.3(7)   | C(9)-C(10)-H(10A)    | 119.9    |
| N(1)-C(1)-C(2)      | 122.2(7)   | C(11')-C(10')-C(9')  | 118.6(7) |
| N(1)-C(1)-C(1')     | 116.5(6)   | C(11')-C(10')-H(10B) | 120.7    |
| C(2)-C(1)-C(1')     | 121.3(6)   | C(9')-C(10')-H(10B)  | 120.7    |
| C(1')-C(2')-C(3')   | 119.7(7)   | C(6')-C(11')-C(10')  | 121.0(7) |
| C(1')-C(2')-H(2'A)  | 120.2      | C(6')-C(11')-H(11A)  | 119.5    |
| C(3')-C(2')-H(2'A)  | 120.2      | C(10')-C(11')-H(11A) | 119.5    |
| C(1)-C(2)-C(3)      | 119.7(7)   | C(10)-C(11)-C(6)     | 121.0(8) |
| C(1)-C(2)-H(2A)     | 120.2      | C(10)-C(11)-H(11B)   | 119.5    |
| C(3)-C(2)-H(2A)     | 120.2      | C(6)-C(11)-H(11B)    | 119.5    |
| C(4')-C(3')-C(2')   | 119.1(7)   | C(17')-C(12')-C(13') | 119.6(7) |
| C(4')-C(3')-H(3'A)  | 120.5      | C(17')-C(12')-P(2)   | 124.0(6) |
| C(2')-C(3')-H(3'A)  | 120.5      | C(13')-C(12')-P(2)   | 116.2(5) |
| C(4)-C(3)-C(2)      | 118.6(7)   | C(17)-C(12)-C(13)    | 118.7(7) |
| C(4)-C(3)-H(3A)     | 120.7      | C(17)-C(12)-P(1)     | 124.4(6) |
| C(2)-C(3)-H(3A)     | 120.7      | C(13)-C(12)-P(1)     | 116.9(6) |
| C(3')-C(4')-C(5')   | 117.9(7)   | C(14)-C(13)-C(12)    | 120.5(8) |
| C(3')-C(4')-H(4'A)  | 121.0      | C(14)-C(13)-H(13A)   | 119.7    |
| C(5')-C(4')-H(4'A)  | 121.0      | C(12)-C(13)-H(13A)   | 119.7    |
| C(3)-C(4)-C(5)      | 118.4(7)   | C(14')-C(13')-C(12') | 119.6(7) |
| C(3)-C(4)-H(4A)     | 120.8      | C(14')-C(13')-H(13B) | 120.2    |
| C(5)-C(4)-H(4A)     | 120.8      | C(12')-C(13')-H(13B) | 120.2    |
| N(1)-C(5)-C(4)      | 124.3(7)   | C(15')-C(14')-C(13') | 119.9(7) |
| N(1)-C(5)-P(1)      | 112.1(5)   | C(15')-C(14')-H(14A) | 120.0    |
| C(4)-C(5)-P(1)      | 123.5(6)   | C(13')-C(14')-H(14A) | 120.0    |
| N(2)-C(5')-C(4')    | 123.2(7)   | C(15)-C(14)-C(13)    | 120.1(8) |
| N(2)-C(5')-P(2)     | 110.6(5)   | C(15)-C(14)-H(14B)   | 120.0    |
| C(4')-C(5')-P(2)    | 125.9(6)   | C(13)-C(14)-H(14B)   | 120.0    |
| C(11')-C(6')-C(7')  | 119.4(7)   | C(14)-C(15)-C(16)    | 120.5(8) |
| C(11')-C(6')-P(2)   | 120.9(6)   | C(14)-C(15)-H(15A)   | 119.8    |

|                       |          |                         |          |
|-----------------------|----------|-------------------------|----------|
| C(16)-C(15)-H(15A)    | 119.8    | C(3A)-C(4A)-C(5A)       | 118.1(7) |
| C(16')-C(15')-C(14')  | 121.2(7) | C(3A)-C(4A)-H(4AA)      | 121.0    |
| C(16')-C(15')-H(15B)  | 119.4    | C(5A)-C(4A)-H(4AA)      | 121.0    |
| C(14')-C(15')-H(15B)  | 119.4    | C(3'')-C(4'')-C(5'')    | 117.9(7) |
| C(15')-C(16')-C(17')  | 119.7(7) | C(3'')-C(4'')-H(4''A)   | 121.0    |
| C(15')-C(16')-H(16A)  | 120.1    | C(5'')-C(4'')-H(4''A)   | 121.0    |
| C(17')-C(16')-H(16A)  | 120.1    | N(2A)-C(5'')-C(4'')     | 124.3(7) |
| C(15)-C(16)-C(17)     | 120.3(8) | N(2A)-C(5'')-P(2A)      | 112.4(5) |
| C(15)-C(16)-H(16B)    | 119.9    | C(4'')-C(5'')-P(2A)     | 123.2(6) |
| C(17)-C(16)-H(16B)    | 119.9    | N(1A)-C(5A)-C(4A)       | 122.3(7) |
| C(12')-C(17')-C(16')  | 119.9(7) | N(1A)-C(5A)-P(1A)       | 112.2(5) |
| C(12')-C(17')-H(17A)  | 120.0    | C(4A)-C(5A)-P(1A)       | 125.3(6) |
| C(16')-C(17')-H(17A)  | 120.0    | C(11'')-C(6'')-C(7'')   | 119.9(7) |
| C(12)-C(17)-C(16)     | 119.9(7) | C(11'')-C(6'')-P(2A)    | 118.6(6) |
| C(12)-C(17)-H(17B)    | 120.1    | C(7'')-C(6'')-P(2A)     | 121.2(6) |
| C(16)-C(17)-H(17B)    | 120.1    | C(11A)-C(6A)-C(7A)      | 120.2(7) |
| O(1A)-P(1A)-C(6A)     | 114.2(3) | C(11A)-C(6A)-P(1A)      | 117.9(6) |
| O(1A)-P(1A)-C(12A)    | 109.2(3) | C(7A)-C(6A)-P(1A)       | 121.6(6) |
| C(6A)-P(1A)-C(12A)    | 110.7(3) | C(8'')-C(7'')-C(6'')    | 119.9(8) |
| O(1A)-P(1A)-C(5A)     | 109.1(3) | C(8'')-C(7'')-H(7''A)   | 120.1    |
| C(6A)-P(1A)-C(5A)     | 108.0(4) | C(6'')-C(7'')-H(7''A)   | 120.1    |
| C(12A)-P(1A)-C(5A)    | 105.2(4) | C(8A)-C(7A)-C(6A)       | 119.8(8) |
| P(1A)-O(1A)-Gd(2)     | 127.4(3) | C(8A)-C(7A)-H(7AA)      | 120.1    |
| O(2A)-P(2A)-C(12'')   | 111.8(3) | C(6A)-C(7A)-H(7AA)      | 120.1    |
| O(2A)-P(2A)-C(6'')    | 113.3(3) | C(9A)-C(8A)-C(7A)       | 119.9(9) |
| C(12'')-P(2A)-C(6'')  | 109.7(3) | C(9A)-C(8A)-H(8AA)      | 120.1    |
| O(2A)-P(2A)-C(5'')    | 107.4(3) | C(7A)-C(8A)-H(8AA)      | 120.1    |
| C(12'')-P(2A)-C(5'')  | 109.8(3) | C(9'')-C(8'')-C(7'')    | 119.2(8) |
| C(6'')-P(2A)-C(5'')   | 104.6(3) | C(9'')-C(8'')-H(8''A)   | 120.4    |
| P(2A)-O(2A)-Gd(2)     | 126.2(3) | C(7'')-C(8'')-H(8''A)   | 120.4    |
| C(5A)-N(1A)-C(1A)     | 118.1(6) | C(10'')-C(9'')-C(8'')   | 121.6(8) |
| C(5A)-N(1A)-Gd(2)     | 118.7(5) | C(10'')-C(9'')-H(9''A)  | 119.2    |
| C(1A)-N(1A)-Gd(2)     | 121.3(5) | C(8'')-C(9'')-H(9''A)   | 119.2    |
| C(1'')-N(2A)-C(5'')   | 116.7(6) | C(8A)-C(9A)-C(10A)      | 120.6(8) |
| C(1'')-N(2A)-Gd(2)    | 121.5(5) | C(8A)-C(9A)-H(9AA)      | 119.7    |
| C(5'')-N(2A)-Gd(2)    | 121.5(5) | C(10A)-C(9A)-H(9AA)     | 119.7    |
| N(1A)-C(1A)-C(2A)     | 122.0(7) | C(9'')-C(10'')-C(11'')  | 120.0(8) |
| N(1A)-C(1A)-C(1'')    | 115.7(6) | C(9'')-C(10'')-H(10C)   | 120.0    |
| C(2A)-C(1A)-C(1'')    | 122.3(7) | C(11'')-C(10'')-H(10C)  | 120.0    |
| N(2A)-C(1'')-C(2'')   | 122.9(6) | C(9A)-C(10A)-C(11A)     | 120.0(8) |
| N(2A)-C(1'')-C(1A)    | 116.1(6) | C(9A)-C(10A)-H(10D)     | 120.0    |
| C(2'')-C(1'')-C(1A)   | 120.8(6) | C(11A)-C(10A)-H(10D)    | 120.0    |
| C(3A)-C(2A)-C(1A)     | 119.2(7) | C(6A)-C(11A)-C(10A)     | 119.5(8) |
| C(3A)-C(2A)-H(2AA)    | 120.4    | C(6A)-C(11A)-H(11C)     | 120.2    |
| C(1A)-C(2A)-H(2AA)    | 120.4    | C(10A)-C(11A)-H(11C)    | 120.2    |
| C(1'')-C(2'')-C(3'')  | 119.3(7) | C(10'')-C(11'')-C(6'')  | 119.3(7) |
| C(1'')-C(2'')-H(2''A) | 120.4    | C(10'')-C(11'')-H(11D)  | 120.3    |
| C(3'')-C(2'')-H(2''A) | 120.4    | C(6'')-C(11'')-H(11D)   | 120.3    |
| C(4'')-C(3'')-C(2'')  | 118.9(7) | C(17A)-C(12A)-C(13A)    | 118.7(7) |
| C(4'')-C(3'')-H(3''A) | 120.6    | C(17A)-C(12A)-P(1A)     | 118.5(6) |
| C(2'')-C(3'')-H(3''A) | 120.6    | C(13A)-C(12A)-P(1A)     | 122.1(6) |
| C(2A)-C(3A)-C(4A)     | 119.7(7) | C(13'')-C(12'')-C(17'') | 120.0(7) |
| C(2A)-C(3A)-H(3AA)    | 120.2    | C(13'')-C(12'')-P(2A)   | 116.7(6) |
| C(4A)-C(3A)-H(3AA)    | 120.2    | C(17'')-C(12'')-P(2A)   | 123.3(6) |

|                      |          |                      |          |
|----------------------|----------|----------------------|----------|
| C(12")-C(13")-C(14") | 120.3(7) | N(2NA)-O(5NA)-Gd(2)  | 95.9(4)  |
| C(12")-C(13")-H(13C) | 119.8    | N(2NA)-O(4NA)-Gd(2)  | 98.0(4)  |
| C(14")-C(13")-H(13C) | 119.8    | N(3N)-O(8N)-Gd(1)    | 96.3(4)  |
| C(14A)-C(13A)-C(12A) | 119.2(8) | N(3NA)-O(7NA)-Gd(2)  | 95.2(4)  |
| C(14A)-C(13A)-H(13D) | 120.4    | O(3N)-N(1N)-O(2N)    | 122.7(6) |
| C(12A)-C(13A)-H(13D) | 120.4    | O(3N)-N(1N)-O(1N)    | 121.1(6) |
| C(15A)-C(14A)-C(13A) | 121.8(8) | O(2N)-N(1N)-O(1N)    | 116.2(6) |
| C(15A)-C(14A)-H(14C) | 119.1    | O(3N)-N(1N)-Gd(1)    | 178.3(6) |
| C(13A)-C(14A)-H(14C) | 119.1    | O(2N)-N(1N)-Gd(1)    | 57.0(3)  |
| C(15")-C(14")-C(13") | 119.4(8) | O(1N)-N(1N)-Gd(1)    | 59.2(3)  |
| C(15")-C(14")-H(14D) | 120.3    | N(2N)-O(4N)-Gd(1)    | 95.9(4)  |
| C(13")-C(14")-H(14D) | 120.3    | O(6NA)-N(2NA)-O(5NA) | 122.4(7) |
| C(14")-C(15")-C(16") | 120.8(8) | O(6NA)-N(2NA)-O(4NA) | 122.0(7) |
| C(14")-C(15")-H(15C) | 119.6    | O(5NA)-N(2NA)-O(4NA) | 115.6(6) |
| C(16")-C(15")-H(15C) | 119.6    | O(6NA)-N(2NA)-Gd(2)  | 178.6(6) |
| C(14A)-C(15A)-C(16A) | 119.0(7) | O(5NA)-N(2NA)-Gd(2)  | 59.0(3)  |
| C(14A)-C(15A)-H(15D) | 120.5    | O(4NA)-N(2NA)-Gd(2)  | 56.6(3)  |
| C(16A)-C(15A)-H(15D) | 120.5    | N(1NA)-O(1NA)-Gd(2)  | 97.2(4)  |
| C(17A)-C(16A)-C(15A) | 120.0(8) | N(2N)-O(5N)-Gd(1)    | 98.5(4)  |
| C(17A)-C(16A)-H(16C) | 120.0    | N(1NA)-O(2NA)-Gd(2)  | 95.0(4)  |
| C(15A)-C(16A)-H(16C) | 120.0    | O(6N)-N(2N)-O(5N)    | 123.2(7) |
| C(15")-C(16")-C(17") | 120.5(8) | O(6N)-N(2N)-O(4N)    | 121.6(7) |
| C(15")-C(16")-H(16D) | 119.8    | O(5N)-N(2N)-O(4N)    | 115.1(6) |
| C(17")-C(16")-H(16D) | 119.8    | O(6N)-N(2N)-Gd(1)    | 179.0(5) |
| C(16A)-C(17A)-C(12A) | 121.3(8) | O(5N)-N(2N)-Gd(1)    | 56.4(4)  |
| C(16A)-C(17A)-H(17C) | 119.4    | O(4N)-N(2N)-Gd(1)    | 58.8(3)  |
| C(12A)-C(17A)-H(17C) | 119.4    | N(1N)-O(1N)-Gd(1)    | 94.7(4)  |
| C(12")-C(17")-C(16") | 118.9(8) | O(3NA)-N(1NA)-O(1NA) | 122.4(7) |
| C(12")-C(17")-H(17D) | 120.6    | O(3NA)-N(1NA)-O(2NA) | 121.4(7) |
| C(16")-C(17")-H(17D) | 120.6    | O(1NA)-N(1NA)-O(2NA) | 116.1(6) |
| O(9N)-N(3N)-O(7N)    | 122.5(7) | O(3NA)-N(1NA)-Gd(2)  | 178.0(5) |
| O(9N)-N(3N)-O(8N)    | 122.1(7) | O(1NA)-N(1NA)-Gd(2)  | 57.3(3)  |
| O(7N)-N(3N)-O(8N)    | 115.4(6) | O(2NA)-N(1NA)-Gd(2)  | 58.9(3)  |
| O(9N)-N(3N)-Gd(1)    | 173.2(5) | O(9NA)-N(3NA)-O(7NA) | 121.7(7) |
| O(7N)-N(3N)-Gd(1)    | 58.3(3)  | O(9NA)-N(3NA)-O(8NA) | 122.4(7) |
| O(8N)-N(3N)-Gd(1)    | 57.5(3)  | O(7NA)-N(3NA)-O(8NA) | 115.9(6) |
| N(1N)-O(2N)-Gd(1)    | 97.7(4)  | O(9NA)-N(3NA)-Gd(2)  | 174.5(6) |
| N(3N)-O(7N)-Gd(1)    | 96.3(4)  | O(7NA)-N(3NA)-Gd(2)  | 59.1(3)  |
| N(3NA)-O(8NA)-Gd(2)  | 96.8(4)  | O(8NA)-N(3NA)-Gd(2)  | 57.4(3)  |

---

Symmetry transformations used to generate equivalent atoms:

**Table 30 Anisotropic displacement parameters ( $\text{\AA}^2 \times 10^3$ ) for DPPOGd(NO<sub>3</sub>)<sub>3</sub>. The anisotropic displacement factor exponent takes the form:  $-2\pi^2 [h^2 a^{*2} U^{11} + \dots + 2 h k a^* b^* U^{12}]$**

|        | U <sup>11</sup> | U <sup>22</sup> | U <sup>33</sup> | U <sup>23</sup> | U <sup>13</sup> | U <sup>12</sup> |
|--------|-----------------|-----------------|-----------------|-----------------|-----------------|-----------------|
| Gd(1)  | 9(1)            | 15(1)           | 11(1)           | 0(1)            | -1(1)           | 1(1)            |
| Gd(2)  | 9(1)            | 16(1)           | 11(1)           | 0(1)            | -1(1)           | 1(1)            |
| P(1)   | 16(1)           | 16(1)           | 14(1)           | 1(1)            | -3(1)           | 0(1)            |
| O(1)   | 15(3)           | 16(2)           | 17(3)           | 3(2)            | 1(2)            | 3(2)            |
| P(2)   | 11(1)           | 19(1)           | 17(1)           | 2(1)            | -3(1)           | 0(1)            |
| O(2)   | 10(2)           | 20(3)           | 20(3)           | 6(2)            | -8(2)           | -5(2)           |
| N(1)   | 13(3)           | 13(3)           | 15(3)           | -4(2)           | -3(2)           | 2(2)            |
| N(2)   | 8(3)            | 13(3)           | 16(3)           | 0(2)            | -2(2)           | -1(2)           |
| C(1')  | 21(4)           | 17(4)           | 14(4)           | -1(3)           | 4(3)            | -2(3)           |
| C(1)   | 18(4)           | 17(4)           | 13(4)           | -3(3)           | -3(3)           | 2(3)            |
| C(2')  | 20(4)           | 20(4)           | 26(4)           | -2(3)           | -5(3)           | -2(3)           |
| C(2)   | 29(5)           | 14(4)           | 25(4)           | 1(3)            | -7(4)           | -8(3)           |
| C(3')  | 22(4)           | 18(4)           | 30(5)           | 7(3)            | -8(4)           | -4(3)           |
| C(3)   | 46(5)           | 17(4)           | 24(5)           | -5(3)           | -9(4)           | -10(4)          |
| C(4')  | 26(4)           | 23(4)           | 18(4)           | 5(3)            | -2(3)           | 1(3)            |
| C(4)   | 40(5)           | 24(4)           | 16(4)           | 3(3)            | -12(4)          | -3(4)           |
| C(5)   | 27(4)           | 20(4)           | 10(4)           | -1(3)           | -5(3)           | -1(3)           |
| C(5')  | 11(4)           | 20(4)           | 22(4)           | 8(3)            | -5(3)           | 0(3)            |
| C(6')  | 19(4)           | 16(4)           | 14(4)           | -1(3)           | 2(3)            | 2(3)            |
| C(6)   | 19(4)           | 15(4)           | 25(4)           | 2(3)            | -4(3)           | -6(3)           |
| C(7')  | 14(4)           | 30(4)           | 24(4)           | 2(3)            | 3(3)            | 0(3)            |
| C(7)   | 24(4)           | 28(4)           | 25(5)           | 11(4)           | 5(4)            | -4(3)           |
| C(8')  | 21(4)           | 39(5)           | 24(5)           | -5(4)           | -11(4)          | 2(4)            |
| C(8)   | 18(4)           | 45(5)           | 41(6)           | 16(4)           | 1(4)            | -4(4)           |
| C(9')  | 21(4)           | 35(5)           | 20(4)           | 2(4)            | -5(3)           | 1(4)            |
| C(9)   | 16(4)           | 44(6)           | 50(6)           | 2(5)            | -6(4)           | 5(4)            |
| C(10)  | 29(5)           | 42(6)           | 42(6)           | 16(5)           | -4(4)           | 3(4)            |
| C(10') | 23(4)           | 33(5)           | 22(4)           | 10(4)           | -1(3)           | -5(4)           |
| C(11') | 16(4)           | 35(5)           | 20(4)           | 1(3)            | -3(3)           | -3(3)           |
| C(11)  | 24(4)           | 33(5)           | 29(5)           | 8(4)            | 2(4)            | 1(4)            |
| C(12') | 11(4)           | 16(4)           | 21(4)           | -2(3)           | -4(3)           | 4(3)            |
| C(12)  | 16(4)           | 20(4)           | 16(4)           | -2(3)           | -2(3)           | -2(3)           |
| C(13)  | 26(4)           | 28(4)           | 24(4)           | 4(3)            | -4(4)           | -6(3)           |
| C(13') | 16(4)           | 22(4)           | 25(4)           | 1(3)            | -2(3)           | 0(3)            |
| C(14') | 19(4)           | 29(4)           | 29(5)           | 4(4)            | 3(4)            | -5(3)           |
| C(14)  | 28(5)           | 43(5)           | 29(5)           | -2(4)           | 5(4)            | -14(4)          |
| C(15)  | 35(5)           | 32(5)           | 32(5)           | -3(4)           | 15(4)           | -15(4)          |
| C(15') | 26(4)           | 23(4)           | 17(4)           | -4(3)           | -1(3)           | 12(3)           |
| C(16') | 22(4)           | 25(4)           | 20(4)           | -1(3)           | -1(3)           | 10(3)           |
| C(16)  | 58(7)           | 46(6)           | 15(4)           | -8(4)           | 10(4)           | -13(5)          |
| C(17') | 28(4)           | 14(4)           | 19(4)           | 5(3)            | 4(3)            | 0(3)            |
| C(17)  | 21(4)           | 35(5)           | 24(5)           | -3(4)           | -5(3)           | -15(4)          |
| P(1A)  | 11(1)           | 19(1)           | 21(1)           | -2(1)           | 3(1)            | 1(1)            |
| O(1A)  | 10(3)           | 22(3)           | 26(3)           | -4(2)           | 4(2)            | 0(2)            |
| P(2A)  | 15(1)           | 17(1)           | 13(1)           | 0(1)            | 0(1)            | 1(1)            |
| O(2A)  | 17(3)           | 17(3)           | 14(3)           | 0(2)            | 3(2)            | 0(2)            |
| N(1A)  | 13(3)           | 19(3)           | 18(3)           | 0(3)            | -2(3)           | -1(2)           |

|        |       |       |       |        |        |        |
|--------|-------|-------|-------|--------|--------|--------|
| N(2A)  | 14(3) | 17(3) | 17(3) | 0(2)   | -5(3)  | 0(2)   |
| C(1A)  | 14(4) | 20(4) | 19(4) | 3(3)   | 2(3)   | -1(3)  |
| C(1")  | 8(3)  | 16(3) | 17(4) | 0(3)   | 0(3)   | 2(3)   |
| C(2A)  | 20(4) | 23(4) | 27(5) | -4(3)  | 3(3)   | -9(3)  |
| C(2")  | 24(4) | 18(4) | 18(4) | 5(3)   | -2(3)  | 1(3)   |
| C(3")  | 25(4) | 29(4) | 21(4) | 4(3)   | 5(3)   | -8(4)  |
| C(3A)  | 39(5) | 14(4) | 27(5) | -8(3)  | 13(4)  | -8(3)  |
| C(4A)  | 30(5) | 24(4) | 27(5) | -4(3)  | 6(4)   | 1(3)   |
| C(4")  | 28(4) | 23(4) | 11(4) | 3(3)   | -2(3)  | 1(3)   |
| C(5")  | 20(4) | 20(4) | 11(4) | -1(3)  | -3(3)  | 4(3)   |
| C(5A)  | 12(4) | 17(4) | 25(4) | -4(3)  | 6(3)   | -3(3)  |
| C(6")  | 19(4) | 15(4) | 21(4) | 1(3)   | 1(3)   | 3(3)   |
| C(6A)  | 20(4) | 17(4) | 23(4) | -5(3)  | 0(3)   | 10(3)  |
| C(7")  | 28(4) | 26(4) | 10(4) | -3(3)  | 7(3)   | 2(3)   |
| C(7A)  | 34(5) | 41(5) | 24(5) | -3(4)  | 3(4)   | 3(4)   |
| C(8A)  | 41(6) | 46(6) | 29(5) | -15(4) | -3(4)  | -2(5)  |
| C(8")  | 25(5) | 33(5) | 29(5) | -4(4)  | 9(4)   | 3(4)   |
| C(9")  | 20(4) | 27(4) | 43(6) | -8(4)  | 5(4)   | 2(3)   |
| C(9A)  | 36(5) | 54(6) | 24(5) | -8(4)  | 1(4)   | 13(5)  |
| C(10") | 18(4) | 28(4) | 34(5) | -5(4)  | -13(4) | 4(3)   |
| C(10A) | 37(5) | 48(6) | 31(5) | 1(4)   | 15(4)  | -1(4)  |
| C(11A) | 27(5) | 26(4) | 27(5) | 2(4)   | 3(4)   | -1(4)  |
| C(11") | 26(5) | 29(4) | 24(5) | -10(4) | -3(4)  | 3(4)   |
| C(12A) | 15(4) | 23(4) | 24(4) | 1(3)   | 10(3)  | 2(3)   |
| C(12") | 13(4) | 21(4) | 19(4) | 1(3)   | 3(3)   | 2(3)   |
| C(13") | 35(5) | 25(4) | 16(4) | 6(3)   | -4(4)  | -3(4)  |
| C(13A) | 36(5) | 18(4) | 23(4) | -4(3)  | -1(4)  | 8(3)   |
| C(14A) | 18(4) | 31(5) | 36(5) | 10(4)  | -4(4)  | 8(4)   |
| C(14") | 35(5) | 36(5) | 27(5) | -8(4)  | -2(4)  | -13(4) |
| C(15") | 24(5) | 40(5) | 28(5) | -1(4)  | -10(4) | -4(4)  |
| C(15A) | 13(4) | 27(4) | 28(5) | 9(4)   | -1(3)  | -9(3)  |
| C(16A) | 18(4) | 35(5) | 29(5) | -3(4)  | 1(4)   | -8(4)  |
| C(16") | 55(7) | 50(6) | 24(5) | 15(4)  | -25(5) | -11(5) |
| C(17A) | 20(4) | 27(4) | 31(5) | 1(4)   | -1(4)  | 1(3)   |
| C(17") | 45(6) | 37(5) | 26(5) | 7(4)   | -9(4)  | -6(4)  |
| N(3N)  | 21(4) | 28(4) | 19(4) | 2(3)   | 2(3)   | -6(3)  |
| O(2N)  | 16(3) | 33(3) | 15(3) | 4(2)   | -5(2)  | -6(2)  |
| O(7N)  | 12(3) | 17(3) | 27(3) | 0(2)   | 2(2)   | 2(2)   |
| O(8NA) | 22(3) | 23(3) | 23(3) | 5(2)   | -4(2)  | 0(2)   |
| O(5NA) | 21(3) | 31(3) | 28(3) | 14(3)  | -6(3)  | -5(2)  |
| O(4NA) | 22(3) | 34(3) | 23(3) | 7(3)   | 5(2)   | 6(2)   |
| O(8N)  | 20(3) | 24(3) | 22(3) | -12(2) | 9(2)   | -7(2)  |
| O(7NA) | 21(3) | 19(3) | 20(3) | 2(2)   | -1(2)  | -1(2)  |
| N(1N)  | 23(4) | 25(3) | 14(3) | -1(3)  | 1(3)   | -8(3)  |
| O(4N)  | 26(3) | 31(3) | 23(3) | -5(2)  | -2(3)  | 9(3)   |
| N(2NA) | 39(4) | 22(4) | 17(4) | -1(3)  | -16(3) | -4(3)  |
| O(1NA) | 12(3) | 33(3) | 16(3) | 2(2)   | -2(2)  | -9(2)  |
| O(5N)  | 24(3) | 29(3) | 33(3) | -5(3)  | 7(3)   | -4(2)  |
| O(2NA) | 21(3) | 26(3) | 19(3) | -1(2)  | 3(2)   | -3(2)  |
| N(2N)  | 28(4) | 22(3) | 12(3) | 2(3)   | 1(3)   | 0(3)   |
| O(1N)  | 13(3) | 34(3) | 19(3) | 3(2)   | -6(2)  | -3(2)  |
| O(6NA) | 50(4) | 32(3) | 30(3) | 19(3)  | -22(3) | -10(3) |
| N(1NA) | 28(4) | 21(3) | 17(4) | 0(3)   | -2(3)  | -7(3)  |
| O(9NA) | 32(4) | 48(4) | 35(4) | -5(3)  | -24(3) | -5(3)  |

|        |       |       |       |        |        |        |
|--------|-------|-------|-------|--------|--------|--------|
| N(3NA) | 22(4) | 31(4) | 24(4) | 1(3)   | -7(3)  | -5(3)  |
| O(9N)  | 22(3) | 48(4) | 39(4) | 0(3)   | 18(3)  | -3(3)  |
| O(3N)  | 31(3) | 58(4) | 17(3) | 7(3)   | 5(3)   | -19(3) |
| O(6N)  | 50(4) | 27(3) | 36(4) | -18(3) | 15(3)  | -6(3)  |
| O(3NA) | 37(4) | 53(4) | 25(3) | -15(3) | -11(3) | -14(3) |

---



**Table 31 Hydrogen coordinates (  $\times 10^4$ ) and isotropic displacement parameters ( $\text{\AA}^2 \times 10^3$ ) for DPPOGd(NO<sub>3</sub>)<sub>3</sub>.**

|        | x     | y     | z     | U(eq) |
|--------|-------|-------|-------|-------|
| H(2'A) | 2666  | 6305  | 2528  | 27    |
| H(2A)  | 2611  | 6677  | 1410  | 28    |
| H(3'A) | 3212  | 5771  | 3491  | 28    |
| H(3A)  | 2233  | 7270  | 383   | 35    |
| H(4'A) | 4072  | 6457  | 4004  | 27    |
| H(4A)  | 2294  | 8609  | 296   | 32    |
| H(7'A) | 5714  | 8070  | 4565  | 27    |
| H(7A)  | 1535  | 9411  | 1867  | 31    |
| H(8'A) | 5912  | 7839  | 5745  | 34    |
| H(8A)  | 452   | 9730  | 1671  | 41    |
| H(9'A) | 5106  | 7354  | 6453  | 30    |
| H(9A)  | 174   | 10555 | 762   | 44    |
| H(10A) | 992   | 11089 | 72    | 45    |
| H(10B) | 4034  | 7236  | 6023  | 31    |
| H(11A) | 3817  | 7571  | 4860  | 28    |
| H(11B) | 2070  | 10804 | 292   | 35    |
| H(13A) | 3852  | 10685 | 1366  | 31    |
| H(13B) | 5551  | 8889  | 3044  | 25    |
| H(14A) | 6437  | 8620  | 2319  | 31    |
| H(14B) | 4612  | 11159 | 586   | 40    |
| H(15A) | 4484  | 10956 | -598  | 40    |
| H(15B) | 6635  | 7375  | 1968  | 26    |
| H(16A) | 6031  | 6369  | 2405  | 27    |
| H(16B) | 3602  | 10279 | -1016 | 47    |
| H(17A) | 5150  | 6616  | 3142  | 24    |
| H(17B) | 2847  | 9759  | -242  | 32    |
| H(2AA) | -2270 | 6151  | 2696  | 28    |
| H(2"A) | -2651 | 6655  | 3605  | 24    |
| H(3"A) | -3164 | 7319  | 4519  | 30    |
| H(3AA) | -1499 | 5526  | 2011  | 32    |
| H(4AA) | -635  | 6229  | 1539  | 32    |
| H(4"A) | -3072 | 8661  | 4564  | 25    |
| H(7"A) | -3082 | 10250 | 4895  | 26    |
| H(7AA) | -1034 | 7096  | 511   | 39    |
| H(8AA) | -864  | 6923  | -689  | 47    |
| H(8"A) | -4165 | 10558 | 5128  | 35    |
| H(9"A) | -4908 | 10606 | 4217  | 36    |
| H(9AA) | 47    | 7451  | -1218 | 45    |
| H(10C) | -4579 | 10481 | 3076  | 32    |
| H(10D) | 808   | 8131  | -559  | 46    |
| H(11C) | 643   | 8314  | 642   | 32    |
| H(11D) | -3512 | 10117 | 2828  | 32    |
| H(13C) | -1523 | 10968 | 3689  | 30    |
| H(13D) | 488   | 6568  | 1808  | 31    |
| H(14C) | 1330  | 6304  | 2593  | 34    |
| H(14D) | -757  | 11449 | 4489  | 39    |
| H(15C) | -572  | 10805 | 5523  | 37    |
| H(15D) | 1734  | 7237  | 3327  | 27    |

|        |       |      |      |    |
|--------|-------|------|------|----|
| H(16C) | 1258  | 8469 | 3320 | 33 |
| H(16D) | -1197 | 9754 | 5823 | 52 |
| H(17C) | 408   | 8738 | 2563 | 31 |
| H(17D) | -2003 | 9301 | 5059 | 44 |

---

**Table 32** Torsion angles [°] for DPPOGd(NO<sub>3</sub>)<sub>3</sub>.

|                         |           |                             |           |
|-------------------------|-----------|-----------------------------|-----------|
| C(6)-P(1)-O(1)-Gd(1)    | 131.2(4)  | C(6')-P(2)-C(5')-C(4')      | -32.7(8)  |
| C(12)-P(1)-O(1)-Gd(1)   | -102.9(4) | O(2)-P(2)-C(6')-C(11')      | 88.5(7)   |
| C(5)-P(1)-O(1)-Gd(1)    | 17.4(5)   | C(12')-P(2)-C(6')-C(11')    | -146.4(6) |
| C(12')-P(2)-O(2)-Gd(1)  | 105.7(4)  | C(5')-P(2)-C(6')-C(11')     | -32.6(7)  |
| C(6')-P(2)-O(2)-Gd(1)   | -129.6(4) | O(2)-P(2)-C(6')-C(7')       | -90.4(6)  |
| C(5')-P(2)-O(2)-Gd(1)   | -9.0(5)   | C(12')-P(2)-C(6')-C(7')     | 34.7(7)   |
| C(5')-N(2)-C(1')-C(2')  | 6.3(10)   | C(5')-P(2)-C(6')-C(7')      | 148.5(6)  |
| Gd(1)-N(2)-C(1')-C(2')  | -148.1(6) | O(1)-P(1)-C(6)-C(11)        | 119.0(7)  |
| C(5')-N(2)-C(1')-C(1)   | -171.4(6) | C(12)-P(1)-C(6)-C(11)       | -7.0(8)   |
| Gd(1)-N(2)-C(1')-C(1)   | 34.2(8)   | C(5)-P(1)-C(6)-C(11)        | -125.2(7) |
| C(5)-N(1)-C(1)-C(2)     | -0.1(11)  | O(1)-P(1)-C(6)-C(7)         | -62.2(7)  |
| Gd(1)-N(1)-C(1)-C(2)    | -177.2(6) | C(12)-P(1)-C(6)-C(7)        | 171.8(6)  |
| C(5)-N(1)-C(1)-C(1')    | 177.8(6)  | C(5)-P(1)-C(6)-C(7)         | 53.6(7)   |
| Gd(1)-N(1)-C(1)-C(1')   | 0.7(8)    | C(11')-C(6')-C(7')-C(8')    | 0.3(11)   |
| N(2)-C(1')-C(1)-N(1)    | -22.4(9)  | P(2)-C(6')-C(7')-C(8')      | 179.2(6)  |
| C(2')-C(1')-C(1)-N(1)   | 160.0(7)  | C(11)-C(6)-C(7)-C(8)        | -0.7(12)  |
| N(2)-C(1')-C(1)-C(2)    | 155.5(7)  | P(1)-C(6)-C(7)-C(8)         | -179.5(7) |
| C(2')-C(1')-C(1)-C(2)   | -22.1(11) | C(6')-C(7')-C(8')-C(9')     | 3.4(12)   |
| N(2)-C(1')-C(2')-C(3')  | -4.0(12)  | C(6)-C(7)-C(8)-C(9)         | 1.4(14)   |
| C(1)-C(1')-C(2')-C(3')  | 173.4(7)  | C(7')-C(8')-C(9')-C(10')    | -4.2(13)  |
| N(1)-C(1)-C(2)-C(3)     | 0.6(12)   | C(7)-C(8)-C(9)-C(10)        | -1.0(15)  |
| C(1')-C(1)-C(2)-C(3)    | -177.2(7) | C(8)-C(9)-C(10)-C(11)       | -0.2(15)  |
| C(1')-C(2')-C(3')-C(4') | -1.6(12)  | C(8')-C(9')-C(10')-C(11')   | 1.3(12)   |
| C(1)-C(2)-C(3)-C(4)     | -0.5(13)  | C(7')-C(6')-C(11')-C(10')   | -3.2(12)  |
| C(2')-C(3')-C(4')-C(5') | 4.5(12)   | P(2)-C(6')-C(11')-C(10')    | 177.9(6)  |
| C(2)-C(3)-C(4)-C(5)     | 0.0(13)   | C(9')-C(10')-C(11')-C(6')   | 2.5(12)   |
| C(1)-N(1)-C(5)-C(4)     | -0.5(11)  | C(9)-C(10)-C(11)-C(6)       | 0.9(14)   |
| Gd(1)-N(1)-C(5)-C(4)    | 176.5(6)  | C(7)-C(6)-C(11)-C(10)       | -0.4(13)  |
| C(1)-N(1)-C(5)-P(1)     | 176.2(5)  | P(1)-C(6)-C(11)-C(10)       | 178.3(7)  |
| Gd(1)-N(1)-C(5)-P(1)    | -6.7(7)   | O(2)-P(2)-C(12')-C(17')     | -153.2(6) |
| C(3)-C(4)-C(5)-N(1)     | 0.6(13)   | C(6')-P(2)-C(12')-C(17')    | 79.0(7)   |
| C(3)-C(4)-C(5)-P(1)     | -175.8(7) | C(5')-P(2)-C(12')-C(17')    | -36.5(7)  |
| O(1)-P(1)-C(5)-N(1)     | -4.6(6)   | O(2)-P(2)-C(12')-C(13')     | 20.7(7)   |
| C(6)-P(1)-C(5)-N(1)     | -125.4(6) | C(6')-P(2)-C(12')-C(13')    | -107.0(6) |
| C(12)-P(1)-C(5)-N(1)    | 116.1(6)  | C(5')-P(2)-C(12')-C(13')    | 137.5(6)  |
| O(1)-P(1)-C(5)-C(4)     | 172.2(7)  | O(1)-P(1)-C(12)-C(17)       | 178.9(6)  |
| C(6)-P(1)-C(5)-C(4)     | 51.4(8)   | C(6)-P(1)-C(12)-C(17)       | -53.3(8)  |
| C(12)-P(1)-C(5)-C(4)    | -67.1(8)  | C(5)-P(1)-C(12)-C(17)       | 60.7(8)   |
| C(1')-N(2)-C(5')-C(4')  | -3.1(11)  | O(1)-P(1)-C(12)-C(13)       | -1.7(7)   |
| Gd(1)-N(2)-C(5')-C(4')  | 152.0(6)  | C(6)-P(1)-C(12)-C(13)       | 126.0(6)  |
| C(1')-N(2)-C(5')-P(2)   | 171.2(5)  | C(5)-P(1)-C(12)-C(13)       | -120.0(6) |
| Gd(1)-N(2)-C(5')-P(2)   | -33.7(6)  | C(17)-C(12)-C(13)-C(14)     | -1.6(12)  |
| C(3')-C(4')-C(5')-N(2)  | -2.3(12)  | P(1)-C(12)-C(13)-C(14)      | 179.0(7)  |
| C(3')-C(4')-C(5')-P(2)  | -175.7(6) | C(17')-C(12')-C(13')-C(14') | -1.9(11)  |
| O(2)-P(2)-C(5')-N(2)    | 28.1(6)   | P(2)-C(12')-C(13')-C(14')   | -176.1(6) |
| C(12')-P(2)-C(5')-N(2)  | -90.0(6)  | C(12')-C(13')-C(14')-C(15') | 2.6(12)   |
| C(6')-P(2)-C(5')-N(2)   | 153.2(5)  | C(12)-C(13)-C(14)-C(15)     | 1.4(13)   |
| O(2)-P(2)-C(5')-C(4')   | -157.8(7) | C(13)-C(14)-C(15)-C(16)     | 0.0(14)   |
| C(12')-P(2)-C(5')-C(4') | 84.1(7)   | C(13')-C(14')-C(15')-C(16') | -2.8(12)  |

|                             |           |                                 |           |
|-----------------------------|-----------|---------------------------------|-----------|
| C(14')-C(15')-C(16')-C(17') | 2.4(12)   | C(12A)-P(1A)-C(5A)-N(1A)        | 105.2(6)  |
| C(14)-C(15)-C(16)-C(17)     | -1.2(15)  | O(1A)-P(1A)-C(5A)-C(4A)         | 173.1(7)  |
| C(13')-C(12')-C(17')-C(16') | 1.5(11)   | C(6A)-P(1A)-C(5A)-C(4A)         | 48.4(8)   |
| P(2)-C(12')-C(17')-C(16')   | 175.2(6)  | C(12A)-P(1A)-C(5A)-C(4A)        | -69.8(8)  |
| C(15')-C(16')-C(17')-C(12') | -1.7(11)  | O(2A)-P(2A)-C(6'')-C(11'')      | 30.6(7)   |
| C(13)-C(12)-C(17)-C(16)     | 0.5(12)   | C(12'')-P(2A)-C(6'')-C(11'')    | 156.3(6)  |
| P(1)-C(12)-C(17)-C(16)      | 179.9(7)  | C(5'')-P(2A)-C(6'')-C(11'')     | -86.1(7)  |
| C(15)-C(16)-C(17)-C(12)     | 0.9(14)   | O(2A)-P(2A)-C(6'')-C(7'')       | -156.3(6) |
| C(6A)-P(1A)-O(1A)-Gd(2)     | 114.7(4)  | C(12'')-P(2A)-C(6'')-C(7'')     | -30.6(7)  |
| C(12A)-P(1A)-O(1A)-Gd(2)    | -120.7(4) | C(5'')-P(2A)-C(6'')-C(7'')      | 87.0(7)   |
| C(5A)-P(1A)-O(1A)-Gd(2)     | -6.3(5)   | O(1A)-P(1A)-C(6A)-C(11A)        | 70.9(7)   |
| C(12'')-P(2A)-O(2A)-Gd(2)   | 91.7(4)   | C(12A)-P(1A)-C(6A)-C(11A)       | -52.9(7)  |
| C(6'')-P(2A)-O(2A)-Gd(2)    | -143.7(3) | C(5A)-P(1A)-C(6A)-C(11A)        | -167.5(6) |
| C(5'')-P(2A)-O(2A)-Gd(2)    | -28.7(4)  | O(1A)-P(1A)-C(6A)-C(7A)         | -102.8(7) |
| C(5A)-N(1A)-C(1A)-C(2A)     | -8.4(11)  | C(12A)-P(1A)-C(6A)-C(7A)        | 133.4(7)  |
| Gd(2)-N(1A)-C(1A)-C(2A)     | 155.6(6)  | C(5A)-P(1A)-C(6A)-C(7A)         | 18.8(7)   |
| C(5A)-N(1A)-C(1A)-C(1'')    | 170.2(6)  | C(11'')-C(6'')-C(7'')-C(8'')    | 1.9(12)   |
| Gd(2)-N(1A)-C(1A)-C(1'')    | -25.8(8)  | P(2A)-C(6'')-C(7'')-C(8'')      | -171.1(6) |
| C(5'')-N(2A)-C(1'')-C(2'')  | 0.4(10)   | C(11A)-C(6A)-C(7A)-C(8A)        | 1.6(12)   |
| Gd(2)-N(2A)-C(1'')-C(2'')   | -174.0(5) | P(1A)-C(6A)-C(7A)-C(8A)         | 175.2(7)  |
| C(5'')-N(2A)-C(1'')-C(1A)   | -174.5(6) | C(6A)-C(7A)-C(8A)-C(9A)         | -0.9(14)  |
| Gd(2)-N(2A)-C(1'')-C(1A)    | 11.1(8)   | C(6'')-C(7'')-C(8'')-C(9'')     | -0.2(12)  |
| N(1A)-C(1A)-C(1'')-N(2A)    | 9.2(9)    | C(7'')-C(8'')-C(9'')-C(10'')    | -3.2(13)  |
| C(2A)-C(1A)-C(1'')-N(2A)    | -172.2(7) | C(7A)-C(8A)-C(9A)-C(10A)        | 0.5(15)   |
| N(1A)-C(1A)-C(1'')-C(2'')   | -165.8(7) | C(8'')-C(9'')-C(10'')-C(11'')   | 4.8(13)   |
| C(2A)-C(1A)-C(1'')-C(2'')   | 12.8(11)  | C(8A)-C(9A)-C(10A)-C(11A)       | -0.6(14)  |
| N(1A)-C(1A)-C(2A)-C(3A)     | 8.7(12)   | C(7A)-C(6A)-C(11A)-C(10A)       | -1.7(12)  |
| C(1'')-C(1A)-C(2A)-C(3A)    | -169.8(7) | P(1A)-C(6A)-C(11A)-C(10A)       | -175.5(6) |
| N(2A)-C(1'')-C(2'')-C(3'')  | -1.7(11)  | C(9A)-C(10A)-C(11A)-C(6A)       | 1.2(13)   |
| C(1A)-C(1'')-C(2'')-C(3'')  | 173.0(7)  | C(9'')-C(10'')-C(11'')-C(6'')   | -2.9(12)  |
| C(1'')-C(2'')-C(3'')-C(4'') | 1.9(11)   | C(7'')-C(6'')-C(11'')-C(10'')   | -0.4(12)  |
| C(1A)-C(2A)-C(3A)-C(4A)     | -2.4(13)  | P(2A)-C(6'')-C(11'')-C(10'')    | 172.8(6)  |
| C(2A)-C(3A)-C(4A)-C(5A)     | -3.7(13)  | O(1A)-P(1A)-C(12A)-C(17A)       | 4.1(7)    |
| C(2'')-C(3'')-C(4'')-C(5'') | -0.9(11)  | C(6A)-P(1A)-C(12A)-C(17A)       | 130.8(6)  |
| C(1'')-N(2A)-C(5'')-C(4'')  | 0.7(11)   | C(5A)-P(1A)-C(12A)-C(17A)       | -112.8(6) |
| Gd(2)-N(2A)-C(5'')-C(4'')   | 175.1(5)  | O(1A)-P(1A)-C(12A)-C(13A)       | 174.7(6)  |
| C(1'')-N(2A)-C(5'')-P(2A)   | -176.9(5) | C(6A)-P(1A)-C(12A)-C(13A)       | -58.7(7)  |
| Gd(2)-N(2A)-C(5'')-P(2A)    | -2.5(7)   | C(5A)-P(1A)-C(12A)-C(13A)       | 57.8(7)   |
| C(3'')-C(4'')-C(5'')-N(2A)  | -0.4(12)  | O(2A)-P(2A)-C(12'')-C(13'')     | 28.9(7)   |
| C(3'')-C(4'')-C(5'')-P(2A)  | 176.9(6)  | C(6'')-P(2A)-C(12'')-C(13'')    | -97.6(6)  |
| O(2A)-P(2A)-C(5'')-N(2A)    | 17.4(6)   | C(5'')-P(2A)-C(12'')-C(13'')    | 147.9(6)  |
| C(12'')-P(2A)-C(5'')-N(2A)  | -104.3(5) | O(2A)-P(2A)-C(12'')-C(17'')     | -149.5(7) |
| C(6'')-P(2A)-C(5'')-N(2A)   | 138.1(5)  | C(6'')-P(2A)-C(12'')-C(17'')    | 84.0(7)   |
| O(2A)-P(2A)-C(5'')-C(4'')   | -160.2(6) | C(5'')-P(2A)-C(12'')-C(17'')    | -30.5(8)  |
| C(12'')-P(2A)-C(5'')-C(4'') | 78.1(7)   | C(17'')-C(12'')-C(13'')-C(14'') | -0.3(12)  |
| C(6'')-P(2A)-C(5'')-C(4'')  | -39.6(7)  | P(2A)-C(12'')-C(13'')-C(14'')   | -178.7(6) |
| C(1A)-N(1A)-C(5A)-C(4A)     | 2.0(11)   | C(17A)-C(12A)-C(13A)-C(14A)     | -1.7(12)  |
| Gd(2)-N(1A)-C(5A)-C(4A)     | -162.4(6) | P(1A)-C(12A)-C(13A)-C(14A)      | -172.2(6) |
| C(1A)-N(1A)-C(5A)-P(1A)     | -173.2(5) | C(12A)-C(13A)-C(14A)-C(15A)     | -0.3(13)  |
| Gd(2)-N(1A)-C(5A)-P(1A)     | 22.4(7)   | C(12'')-C(13'')-C(14'')-C(15'') | 2.5(13)   |
| C(3A)-C(4A)-C(5A)-N(1A)     | 4.0(12)   | C(13'')-C(14'')-C(15'')-C(16'') | -2.9(14)  |
| C(3A)-C(4A)-C(5A)-P(1A)     | 178.5(6)  | C(13A)-C(14A)-C(15A)-C(16A)     | 1.6(12)   |
| O(1A)-P(1A)-C(5A)-N(1A)     | -11.9(6)  | C(14A)-C(15A)-C(16A)-C(17A)     | -0.8(12)  |
| C(6A)-P(1A)-C(5A)-N(1A)     | -136.6(5) | C(14'')-C(15'')-C(16'')-C(17'') | 1.1(15)   |

|                                 |           |                            |           |
|---------------------------------|-----------|----------------------------|-----------|
| C(15A)-C(16A)-C(17A)-C(12A)     | -1.2(12)  | Gd(2)-O(4NA)-N(2NA)-O(5NA) | 0.0(6)    |
| C(13A)-C(12A)-C(17A)-C(16A)     | 2.4(12)   | Gd(1)-O(5N)-N(2N)-O(6N)    | 178.9(6)  |
| P(1A)-C(12A)-C(17A)-C(16A)      | 173.3(6)  | Gd(1)-O(5N)-N(2N)-O(4N)    | -0.8(6)   |
| C(13'')-C(12'')-C(17'')-C(16'') | -1.5(13)  | Gd(1)-O(4N)-N(2N)-O(6N)    | -178.9(6) |
| P(2A)-C(12'')-C(17'')-C(16'')   | 176.9(7)  | Gd(1)-O(4N)-N(2N)-O(5N)    | 0.8(6)    |
| C(15'')-C(16'')-C(17'')-C(12'') | 1.1(15)   | O(3N)-N(1N)-O(1N)-Gd(1)    | -178.0(6) |
| O(9N)-N(3N)-O(7N)-Gd(1)         | -172.0(6) | O(2N)-N(1N)-O(1N)-Gd(1)    | 1.2(6)    |
| O(8N)-N(3N)-O(7N)-Gd(1)         | 6.3(6)    | Gd(2)-O(1NA)-N(1NA)-O(3NA) | -177.6(6) |
| O(9N)-N(3N)-O(8N)-Gd(1)         | 172.0(6)  | Gd(2)-O(1NA)-N(1NA)-O(2NA) | 1.9(6)    |
| O(7N)-N(3N)-O(8N)-Gd(1)         | -6.4(6)   | Gd(2)-O(2NA)-N(1NA)-O(3NA) | 177.6(6)  |
| Gd(1)-O(2N)-N(1N)-O(3N)         | 178.0(6)  | Gd(2)-O(2NA)-N(1NA)-O(1NA) | -1.9(6)   |
| Gd(1)-O(2N)-N(1N)-O(1N)         | -1.3(6)   | Gd(2)-O(7NA)-N(3NA)-O(9NA) | 173.6(7)  |
| Gd(2)-O(5NA)-N(2NA)-O(6NA)      | 179.9(6)  | Gd(2)-O(7NA)-N(3NA)-O(8NA) | -8.9(7)   |
| Gd(2)-O(5NA)-N(2NA)-O(4NA)      | 0.0(6)    | Gd(2)-O(8NA)-N(3NA)-O(9NA) | -173.5(7) |
| Gd(2)-O(4NA)-N(2NA)-O(6NA)      | -179.9(6) | Gd(2)-O(8NA)-N(3NA)-O(7NA) | 9.1(7)    |

---

Symmetry transformations used to generate equivalent atoms:

## Structure of PnPPOEu(TFA)3H2O

**Table 33** Crystal data and structure refinement for PnPPOEu(TFA)3H2O.

|                                   |                                             |          |
|-----------------------------------|---------------------------------------------|----------|
| Identification code               | a                                           |          |
| Empirical formula                 | C42 H30 Eu F9 N2 O10 P2                     |          |
| Formula weight                    | 1107.58                                     |          |
| Temperature                       | 120(2) K                                    |          |
| Wavelength                        | 0.71073 Å                                   |          |
| Crystal system                    | Orthorhombic                                |          |
| Space group                       | Pna2 <sub>1</sub>                           |          |
| Unit cell dimensions              | a = 19.8440(13) Å                           | α = 90°. |
|                                   | b = 13.4298(9) Å                            | β = 90°. |
|                                   | c = 16.6234(12) Å                           | γ = 90°. |
| Volume                            | 4430.2(5) Å <sup>3</sup>                    |          |
| Z                                 | 4                                           |          |
| Density (calculated)              | 1.661 Mg/m <sup>3</sup>                     |          |
| Absorption coefficient            | 1.585 mm <sup>-1</sup>                      |          |
| F(000)                            | 2200                                        |          |
| Crystal size                      | 0.210 x 0.160 x 0.110 mm <sup>3</sup>       |          |
| Theta range for data collection   | 1.831 to 28.997°.                           |          |
| Index ranges                      | -27<=h<=25, -16<=k<=18, -22<=l<=22          |          |
| Reflections collected             | 35051                                       |          |
| Independent reflections           | 11776 [R(int) = 0.0807]                     |          |
| Completeness to theta = 25.242°   | 100.0 %                                     |          |
| Absorption correction             | Semi-empirical from equivalents             |          |
| Max. and min. transmission        | 0.849 and 0.723                             |          |
| Refinement method                 | Full-matrix least-squares on F <sup>2</sup> |          |
| Data / restraints / parameters    | 11776 / 61 / 622                            |          |
| Goodness-of-fit on F <sup>2</sup> | 1.012                                       |          |
| Final R indices [I>2sigma(I)]     | R1 = 0.0458, wR2 = 0.0816                   |          |
| R indices (all data)              | R1 = 0.0770, wR2 = 0.0934                   |          |
| Absolute structure parameter      | 0.013(10)                                   |          |
| Extinction coefficient            | n/a                                         |          |
| Largest diff. peak and hole       | 1.073 and -0.650 e. Å <sup>-3</sup>         |          |

**Table 34 Atomic coordinates (  $\times 10^4$ ) and equivalent isotropic displacement parameters ( $\text{\AA}^2 \times 10^3$ ) for PnPPOEu(TFA)3H<sub>2</sub>O. U(eq) is defined as one third of the trace of the orthogonalized U<sup>ij</sup> tensor.**

|       | x        | y        | z         | U(eq) |
|-------|----------|----------|-----------|-------|
| Eu(1) | 6644(1)  | 2343(1)  | 356(1)    | 17(1) |
| P(1)  | 7308(1)  | 3835(2)  | 1880(1)   | 22(1) |
| P(2)  | 5450(1)  | 1438(2)  | -976(1)   | 25(1) |
| O(1)  | 7418(3)  | 3090(5)  | 1221(4)   | 25(2) |
| O(2)  | 6167(3)  | 1423(5)  | -699(4)   | 22(2) |
| N(1)  | 6054(3)  | 3348(5)  | 1543(4)   | 19(1) |
| N(2)  | 5316(3)  | 2395(4)  | 412(7)    | 19(1) |
| C(1)  | 5372(4)  | 3334(6)  | 1631(5)   | 20(2) |
| C(2)  | 6408(4)  | 3860(6)  | 2089(5)   | 24(2) |
| C(3)  | 6116(4)  | 4340(6)  | 2740(5)   | 26(2) |
| C(4)  | 5439(4)  | 4322(6)  | 2821(5)   | 27(2) |
| C(5)  | 5039(4)  | 3818(6)  | 2262(5)   | 24(2) |
| C(6)  | 4329(5)  | 3777(7)  | 2313(5)   | 34(2) |
| C(7)  | 3956(4)  | 3312(7)  | 1744(6)   | 33(2) |
| C(8)  | 4276(4)  | 2834(6)  | 1082(6)   | 27(2) |
| C(9)  | 3914(4)  | 2357(6)  | 458(10)   | 31(3) |
| C(10) | 4234(4)  | 1939(7)  | -163(5)   | 27(2) |
| C(11) | 4948(4)  | 1967(6)  | -164(5)   | 22(2) |
| C(12) | 4980(4)  | 2833(6)  | 1019(5)   | 21(2) |
| C(13) | 7716(4)  | 3495(6)  | 2794(5)   | 26(2) |
| C(14) | 7609(5)  | 2543(6)  | 3064(5)   | 37(2) |
| C(15) | 7900(5)  | 2221(7)  | 3766(6)   | 40(2) |
| C(16) | 8290(5)  | 2862(7)  | 4208(6)   | 41(2) |
| C(17) | 8390(5)  | 3814(9)  | 3954(8)   | 48(3) |
| C(18) | 8108(5)  | 4140(7)  | 3244(6)   | 37(2) |
| C(19) | 7540(4)  | 5055(6)  | 1566(5)   | 28(2) |
| C(20) | 7428(5)  | 5898(7)  | 2031(6)   | 38(2) |
| C(21) | 7595(6)  | 6825(8)  | 1728(8)   | 54(3) |
| C(22) | 7867(6)  | 6903(9)  | 964(8)    | 66(4) |
| C(23) | 7971(5)  | 6084(8)  | 510(7)    | 58(3) |
| C(24) | 7813(5)  | 5144(8)  | 801(6)    | 42(2) |
| C(25) | 5355(4)  | 2213(7)  | -1835(5)  | 30(2) |
| C(26) | 4737(5)  | 2406(8)  | -2194(6)  | 44(3) |
| C(27) | 4694(5)  | 3040(8)  | -2842(6)  | 45(3) |
| C(28) | 5260(6)  | 3492(8)  | -3133(7)  | 53(3) |
| C(29) | 5864(6)  | 3325(9)  | -2785(7)  | 56(3) |
| C(30) | 5924(5)  | 2679(8)  | -2135(6)  | 45(3) |
| C(31) | 5098(4)  | 235(6)   | -1158(6)  | 33(2) |
| C(32) | 4917(5)  | -353(6)  | -518(6)   | 36(2) |
| C(33) | 4683(6)  | -1305(8) | -645(9)   | 62(4) |
| C(34) | 4633(6)  | -1679(8) | -1391(10) | 68(4) |
| C(35) | 4823(7)  | -1098(9) | -2036(9)  | 68(4) |
| C(36) | 5060(6)  | -134(8)  | -1950(7)  | 49(3) |
| O(1W) | 7478(3)  | 2754(5)  | -663(4)   | 28(2) |
| F(1A) | 7895(6)  | -697(10) | 741(7)    | 52(3) |
| F(1B) | 5410(30) | 6050(30) | -410(40)  | 42(6) |

|        |          |           |          |       |
|--------|----------|-----------|----------|-------|
| F(2B)  | 6150(30) | 5820(40)  | 520(17)  | 75(8) |
| F(2A)  | 8837(5)  | -47(9)    | 460(9)   | 58(2) |
| F(3B)  | 5279(19) | 4900(50)  | 460(20)  | 68(7) |
| F(3A)  | 8327(17) | -970(20)  | -417(18) | 51(5) |
| F(3B') | 5168(19) | 4890(50)  | 210(20)  | 68(7) |
| F(2A') | 8919(5)  | -50(11)   | -16(8)   | 58(2) |
| F(2B') | 6040(30) | 5590(40)  | 706(17)  | 75(8) |
| F(1A') | 8193(7)  | -433(11)  | 881(6)   | 52(3) |
| F(1B') | 5550(30) | 6200(30)  | -350(40) | 42(6) |
| F(3A') | 8131(17) | -1060(20) | -314(18) | 51(5) |
| F(1C)  | 6406(6)  | -666(10)  | 665(5)   | 57(3) |
| F(2C)  | 5618(4)  | -570(30)  | 1514(13) | 46(4) |
| F(3C)  | 6532(7)  | -1337(9)  | 1836(8)  | 46(3) |
| F(1C') | 6659(6)  | -952(9)   | 871(6)   | 57(3) |
| F(2C') | 5633(4)  | -610(30)  | 1288(13) | 46(4) |
| F(3C') | 6376(7)  | -1171(9)  | 2089(6)  | 46(3) |
| O(1A)  | 7478(2)  | 1062(3)   | 309(5)   | 27(1) |
| O(1C)  | 6317(3)  | 1169(5)   | 1289(4)  | 34(2) |
| O(1B)  | 6341(3)  | 3876(4)   | -175(3)  | 28(1) |
| O(2A)  | 8009(3)  | 913(4)    | -884(4)  | 39(2) |
| O(2B)  | 6289(4)  | 4952(5)   | -1189(4) | 62(2) |
| O(2C)  | 6917(4)  | 503(5)    | 2289(4)  | 52(2) |
| C(1C)  | 6536(4)  | 468(6)    | 1713(5)  | 28(2) |
| C(1A)  | 7867(4)  | 673(6)    | -191(5)  | 26(2) |
| C(1B)  | 6163(5)  | 4660(6)   | -516(5)  | 29(2) |
| C(2B)  | 5732(4)  | 5358(6)   | 12(5)    | 33(2) |
| C(2C)  | 6285(3)  | -566(6)   | 1452(4)  | 38(2) |
| C(2A)  | 8260(4)  | -258(6)   | 118(5)   | 36(2) |
| O(1S)  | 7369(4)  | 4010(5)   | 8113(5)  | 63(2) |

---



**Table 35 Bond lengths [Å] and angles [°] for PnPPOEu(TFA)3H2O.**

|              |           |              |           |
|--------------|-----------|--------------|-----------|
| Eu(1)-O(1C)  | 2.306(7)  | C(17)-H(17A) | 0.9500    |
| Eu(1)-O(1B)  | 2.318(5)  | C(18)-H(18A) | 0.9500    |
| Eu(1)-O(1)   | 2.330(6)  | C(19)-C(20)  | 1.387(12) |
| Eu(1)-O(2)   | 2.345(6)  | C(19)-C(24)  | 1.388(12) |
| Eu(1)-O(1A)  | 2.389(5)  | C(20)-C(21)  | 1.383(13) |
| Eu(1)-O(1W)  | 2.431(6)  | C(20)-H(20A) | 0.9500    |
| Eu(1)-N(2)   | 2.638(5)  | C(21)-C(22)  | 1.384(17) |
| Eu(1)-N(1)   | 2.663(7)  | C(21)-H(21A) | 0.9500    |
| Eu(1)-P(2)   | 3.464(2)  | C(22)-C(23)  | 1.350(16) |
| Eu(1)-P(1)   | 3.489(2)  | C(22)-H(22A) | 0.9500    |
| Eu(1)-H(1WB) | 2.6695    | C(23)-C(24)  | 1.388(13) |
| P(1)-O(1)    | 1.500(7)  | C(23)-H(23A) | 0.9500    |
| P(1)-C(19)   | 1.780(9)  | C(24)-H(24A) | 0.9500    |
| P(1)-C(13)   | 1.780(8)  | C(25)-C(30)  | 1.384(13) |
| P(1)-C(2)    | 1.820(8)  | C(25)-C(26)  | 1.387(12) |
| P(2)-O(2)    | 1.495(7)  | C(26)-C(27)  | 1.376(13) |
| P(2)-C(25)   | 1.777(9)  | C(26)-H(26A) | 0.9500    |
| P(2)-C(31)   | 1.785(9)  | C(27)-C(28)  | 1.364(15) |
| P(2)-C(11)   | 1.822(8)  | C(27)-H(27A) | 0.9500    |
| N(1)-C(2)    | 1.339(10) | C(28)-C(29)  | 1.350(14) |
| N(1)-C(1)    | 1.361(9)  | C(28)-H(28A) | 0.9500    |
| N(2)-C(11)   | 1.334(12) | C(29)-C(30)  | 1.391(14) |
| N(2)-C(12)   | 1.344(12) | C(29)-H(29A) | 0.9500    |
| C(1)-C(5)    | 1.400(11) | C(30)-H(30A) | 0.9500    |
| C(1)-C(12)   | 1.447(11) | C(31)-C(32)  | 1.374(12) |
| C(2)-C(3)    | 1.387(11) | C(31)-C(36)  | 1.408(14) |
| C(3)-C(4)    | 1.351(12) | C(32)-C(33)  | 1.376(13) |
| C(3)-H(3A)   | 0.9500    | C(32)-H(32A) | 0.9500    |
| C(4)-C(5)    | 1.396(11) | C(33)-C(34)  | 1.342(17) |
| C(4)-H(4A)   | 0.9500    | C(33)-H(33A) | 0.9500    |
| C(5)-C(6)    | 1.413(12) | C(34)-C(35)  | 1.378(18) |
| C(6)-C(7)    | 1.354(12) | C(34)-H(34A) | 0.9500    |
| C(6)-H(6A)   | 0.9500    | C(35)-C(36)  | 1.386(16) |
| C(7)-C(8)    | 1.424(12) | C(35)-H(35A) | 0.9500    |
| C(7)-H(7A)   | 0.9500    | C(36)-H(36A) | 0.9500    |
| C(8)-C(12)   | 1.402(11) | O(1W)-H(1WA) | 0.8000    |
| C(8)-C(9)    | 1.414(16) | O(1W)-H(1WB) | 0.8000    |
| C(9)-C(10)   | 1.335(15) | F(1A)-C(2A)  | 1.394(10) |
| C(9)-H(9A)   | 0.9500    | F(1B)-C(2B)  | 1.322(13) |
| C(10)-C(11)  | 1.419(11) | F(2B)-C(2B)  | 1.341(13) |
| C(10)-H(10A) | 0.9500    | F(2A)-C(2A)  | 1.311(10) |
| C(13)-C(14)  | 1.372(12) | F(3B)-C(2B)  | 1.324(13) |
| C(13)-C(18)  | 1.384(12) | F(3A)-C(2A)  | 1.315(13) |
| C(14)-C(15)  | 1.371(13) | F(3B')-C(2B) | 1.328(13) |
| C(14)-H(14A) | 0.9500    | F(2A')-C(2A) | 1.355(11) |
| C(15)-C(16)  | 1.370(13) | F(2B')-C(2B) | 1.341(13) |
| C(15)-H(15A) | 0.9500    | F(1A')-C(2A) | 1.297(11) |
| C(16)-C(17)  | 1.361(15) | F(1B')-C(2B) | 1.322(13) |
| C(16)-H(16A) | 0.9500    | F(3A')-C(2A) | 1.318(12) |
| C(17)-C(18)  | 1.378(15) | F(1C)-C(2C)  | 1.337(7)  |

|                   |            |                    |            |
|-------------------|------------|--------------------|------------|
| F(2C)-C(2C)       | 1.327(7)   | O(1C)-Eu(1)-P(1)   | 90.61(19)  |
| F(3C)-C(2C)       | 1.311(7)   | O(1B)-Eu(1)-P(1)   | 82.21(15)  |
| F(1C')-C(2C)      | 1.325(7)   | O(1)-Eu(1)-P(1)    | 19.25(15)  |
| F(2C')-C(2C)      | 1.323(7)   | O(2)-Eu(1)-P(1)    | 176.68(15) |
| F(3C')-C(2C)      | 1.346(7)   | O(1A)-Eu(1)-P(1)   | 100.13(17) |
| O(1A)-C(1A)       | 1.249(10)  | O(1W)-Eu(1)-P(1)   | 96.81(16)  |
| O(1C)-C(1C)       | 1.254(10)  | N(2)-Eu(1)-P(1)    | 109.7(2)   |
| O(1B)-C(1B)       | 1.248(9)   | N(1)-Eu(1)-P(1)    | 48.46(14)  |
| O(2A)-C(1A)       | 1.228(10)  | P(2)-Eu(1)-P(1)    | 157.57(5)  |
| O(2B)-C(1B)       | 1.211(10)  | O(1C)-Eu(1)-H(1WB) | 127.9      |
| O(2C)-C(1C)       | 1.221(10)  | O(1B)-Eu(1)-H(1WB) | 89.6       |
| C(1C)-C(2C)       | 1.538(11)  | O(1)-Eu(1)-H(1WB)  | 87.7       |
| C(1A)-C(2A)       | 1.560(12)  | O(2)-Eu(1)-H(1WB)  | 76.0       |
| C(1B)-C(2B)       | 1.543(12)  | O(1A)-Eu(1)-H(1WB) | 54.5       |
| O(1S)-H(1SA)      | 0.8000     | O(1W)-Eu(1)-H(1WB) | 17.2       |
| O(1S)-H(1SB)      | 0.8000     | N(2)-Eu(1)-H(1WB)  | 139.6      |
|                   |            | N(1)-Eu(1)-H(1WB)  | 149.0      |
| O(1C)-Eu(1)-O(1B) | 142.2(2)   | P(2)-Eu(1)-H(1WB)  | 92.9       |
| O(1C)-Eu(1)-O(1)  | 93.7(2)    | P(1)-Eu(1)-H(1WB)  | 104.4      |
| O(1B)-Eu(1)-O(1)  | 91.3(2)    | O(1)-P(1)-C(19)    | 111.3(4)   |
| O(1C)-Eu(1)-O(2)  | 91.6(2)    | O(1)-P(1)-C(13)    | 112.7(4)   |
| O(1B)-Eu(1)-O(2)  | 94.5(2)    | C(19)-P(1)-C(13)   | 111.6(4)   |
| O(1)-Eu(1)-O(2)   | 162.6(2)   | O(1)-P(1)-C(2)     | 107.1(4)   |
| O(1C)-Eu(1)-O(1A) | 74.0(2)    | C(19)-P(1)-C(2)    | 107.0(4)   |
| O(1B)-Eu(1)-O(1A) | 143.8(2)   | C(13)-P(1)-C(2)    | 106.8(4)   |
| O(1)-Eu(1)-O(1A)  | 82.7(2)    | O(1)-P(1)-Eu(1)    | 30.8(2)    |
| O(2)-Eu(1)-O(1A)  | 82.9(2)    | C(19)-P(1)-Eu(1)   | 114.4(3)   |
| O(1C)-Eu(1)-O(1W) | 144.7(2)   | C(13)-P(1)-Eu(1)   | 130.1(3)   |
| O(1B)-Eu(1)-O(1W) | 73.1(2)    | C(2)-P(1)-Eu(1)    | 77.2(3)    |
| O(1)-Eu(1)-O(1W)  | 83.32(18)  | O(2)-P(2)-C(25)    | 110.9(4)   |
| O(2)-Eu(1)-O(1W)  | 82.8(2)    | O(2)-P(2)-C(31)    | 114.4(4)   |
| O(1A)-Eu(1)-O(1W) | 70.7(2)    | C(25)-P(2)-C(31)   | 110.6(4)   |
| O(1C)-Eu(1)-N(2)  | 73.3(3)    | O(2)-P(2)-C(11)    | 107.2(4)   |
| O(1B)-Eu(1)-N(2)  | 74.4(2)    | C(25)-P(2)-C(11)   | 108.0(4)   |
| O(1)-Eu(1)-N(2)   | 128.7(3)   | C(31)-P(2)-C(11)   | 105.3(4)   |
| O(2)-Eu(1)-N(2)   | 68.7(3)    | O(2)-P(2)-Eu(1)    | 32.5(2)    |
| O(1A)-Eu(1)-N(2)  | 135.41(16) | C(25)-P(2)-Eu(1)   | 112.3(3)   |
| O(1W)-Eu(1)-N(2)  | 134.3(3)   | C(31)-P(2)-Eu(1)   | 133.9(3)   |
| O(1C)-Eu(1)-N(1)  | 74.0(2)    | C(11)-P(2)-Eu(1)   | 76.3(3)    |
| O(1B)-Eu(1)-N(1)  | 73.6(2)    | P(1)-O(1)-Eu(1)    | 130.0(3)   |
| O(1)-Eu(1)-N(1)   | 67.3(2)    | P(2)-O(2)-Eu(1)    | 127.4(4)   |
| O(2)-Eu(1)-N(1)   | 130.05(19) | C(2)-N(1)-C(1)     | 117.2(7)   |
| O(1A)-Eu(1)-N(1)  | 134.0(2)   | C(2)-N(1)-Eu(1)    | 122.1(5)   |
| O(1W)-Eu(1)-N(1)  | 134.5(2)   | C(1)-N(1)-Eu(1)    | 120.7(5)   |
| N(2)-Eu(1)-N(1)   | 61.4(3)    | C(11)-N(2)-C(12)   | 117.1(6)   |
| O(1C)-Eu(1)-P(2)  | 89.81(19)  | C(11)-N(2)-Eu(1)   | 120.7(6)   |
| O(1B)-Eu(1)-P(2)  | 83.76(15)  | C(12)-N(2)-Eu(1)   | 122.2(6)   |
| O(1)-Eu(1)-P(2)   | 175.08(16) | N(1)-C(1)-C(5)     | 122.8(7)   |
| O(2)-Eu(1)-P(2)   | 20.05(15)  | N(1)-C(1)-C(12)    | 117.7(7)   |
| O(1A)-Eu(1)-P(2)  | 101.54(16) | C(5)-C(1)-C(12)    | 119.4(7)   |
| O(1W)-Eu(1)-P(2)  | 95.75(16)  | N(1)-C(2)-C(3)     | 123.2(7)   |
| N(2)-Eu(1)-P(2)   | 49.3(2)    | N(1)-C(2)-P(1)     | 112.2(6)   |
| N(1)-Eu(1)-P(2)   | 110.52(14) | C(3)-C(2)-P(1)     | 124.6(6)   |

|                    |           |                     |           |
|--------------------|-----------|---------------------|-----------|
| C(4)-C(3)-C(2)     | 119.0(8)  | C(19)-C(20)-H(20A)  | 120.2     |
| C(4)-C(3)-H(3A)    | 120.5     | C(22)-C(21)-C(20)   | 119.7(11) |
| C(2)-C(3)-H(3A)    | 120.5     | C(22)-C(21)-H(21A)  | 120.2     |
| C(3)-C(4)-C(5)     | 120.5(8)  | C(20)-C(21)-H(21A)  | 120.2     |
| C(3)-C(4)-H(4A)    | 119.7     | C(23)-C(22)-C(21)   | 120.7(11) |
| C(5)-C(4)-H(4A)    | 119.7     | C(23)-C(22)-H(22A)  | 119.6     |
| C(4)-C(5)-C(1)     | 117.2(7)  | C(21)-C(22)-H(22A)  | 119.6     |
| C(4)-C(5)-C(6)     | 123.0(8)  | C(22)-C(23)-C(24)   | 120.8(11) |
| C(1)-C(5)-C(6)     | 119.8(8)  | C(22)-C(23)-H(23A)  | 119.6     |
| C(7)-C(6)-C(5)     | 121.4(8)  | C(24)-C(23)-H(23A)  | 119.6     |
| C(7)-C(6)-H(6A)    | 119.3     | C(19)-C(24)-C(23)   | 119.1(10) |
| C(5)-C(6)-H(6A)    | 119.3     | C(19)-C(24)-H(24A)  | 120.5     |
| C(6)-C(7)-C(8)     | 120.3(8)  | C(23)-C(24)-H(24A)  | 120.5     |
| C(6)-C(7)-H(7A)    | 119.8     | C(30)-C(25)-C(26)   | 118.8(9)  |
| C(8)-C(7)-H(7A)    | 119.8     | C(30)-C(25)-P(2)    | 117.9(7)  |
| C(12)-C(8)-C(9)    | 116.8(8)  | C(26)-C(25)-P(2)    | 123.3(8)  |
| C(12)-C(8)-C(7)    | 120.2(8)  | C(27)-C(26)-C(25)   | 120.5(10) |
| C(9)-C(8)-C(7)     | 123.1(8)  | C(27)-C(26)-H(26A)  | 119.8     |
| C(10)-C(9)-C(8)    | 121.1(7)  | C(25)-C(26)-H(26A)  | 119.8     |
| C(10)-C(9)-H(9A)   | 119.4     | C(28)-C(27)-C(26)   | 120.1(10) |
| C(8)-C(9)-H(9A)    | 119.4     | C(28)-C(27)-H(27A)  | 119.9     |
| C(9)-C(10)-C(11)   | 117.6(8)  | C(26)-C(27)-H(27A)  | 119.9     |
| C(9)-C(10)-H(10A)  | 121.2     | C(29)-C(28)-C(27)   | 120.3(10) |
| C(11)-C(10)-H(10A) | 121.2     | C(29)-C(28)-H(28A)  | 119.8     |
| N(2)-C(11)-C(10)   | 123.9(8)  | C(27)-C(28)-H(28A)  | 119.8     |
| N(2)-C(11)-P(2)    | 113.6(6)  | C(28)-C(29)-C(30)   | 120.8(11) |
| C(10)-C(11)-P(2)   | 122.4(6)  | C(28)-C(29)-H(29A)  | 119.6     |
| N(2)-C(12)-C(8)    | 123.4(7)  | C(30)-C(29)-H(29A)  | 119.6     |
| N(2)-C(12)-C(1)    | 117.7(7)  | C(25)-C(30)-C(29)   | 119.5(9)  |
| C(8)-C(12)-C(1)    | 118.8(7)  | C(25)-C(30)-H(30A)  | 120.3     |
| C(14)-C(13)-C(18)  | 119.5(8)  | C(29)-C(30)-H(30A)  | 120.3     |
| C(14)-C(13)-P(1)   | 116.6(7)  | C(32)-C(31)-C(36)   | 120.5(9)  |
| C(18)-C(13)-P(1)   | 123.8(7)  | C(32)-C(31)-P(2)    | 119.4(7)  |
| C(15)-C(14)-C(13)  | 120.5(9)  | C(36)-C(31)-P(2)    | 119.8(8)  |
| C(15)-C(14)-H(14A) | 119.8     | C(31)-C(32)-C(33)   | 120.3(10) |
| C(13)-C(14)-H(14A) | 119.8     | C(31)-C(32)-H(32A)  | 119.9     |
| C(16)-C(15)-C(14)  | 119.7(9)  | C(33)-C(32)-H(32A)  | 119.9     |
| C(16)-C(15)-H(15A) | 120.1     | C(34)-C(33)-C(32)   | 120.9(12) |
| C(14)-C(15)-H(15A) | 120.1     | C(34)-C(33)-H(33A)  | 119.5     |
| C(17)-C(16)-C(15)  | 120.4(9)  | C(32)-C(33)-H(33A)  | 119.5     |
| C(17)-C(16)-H(16A) | 119.8     | C(33)-C(34)-C(35)   | 119.2(11) |
| C(15)-C(16)-H(16A) | 119.8     | C(33)-C(34)-H(34A)  | 120.4     |
| C(16)-C(17)-C(18)  | 120.4(10) | C(35)-C(34)-H(34A)  | 120.4     |
| C(16)-C(17)-H(17A) | 119.8     | C(34)-C(35)-C(36)   | 122.8(12) |
| C(18)-C(17)-H(17A) | 119.8     | C(34)-C(35)-H(35A)  | 118.6     |
| C(17)-C(18)-C(13)  | 119.5(9)  | C(36)-C(35)-H(35A)  | 118.6     |
| C(17)-C(18)-H(18A) | 120.3     | C(35)-C(36)-C(31)   | 116.3(12) |
| C(13)-C(18)-H(18A) | 120.3     | C(35)-C(36)-H(36A)  | 121.8     |
| C(20)-C(19)-C(24)  | 120.2(9)  | C(31)-C(36)-H(36A)  | 121.8     |
| C(20)-C(19)-P(1)   | 123.1(7)  | Eu(1)-O(1W)-H(1WA)  | 141.4     |
| C(24)-C(19)-P(1)   | 116.6(7)  | Eu(1)-O(1W)-H(1WB)  | 98.5      |
| C(21)-C(20)-C(19)  | 119.6(10) | H(1WA)-O(1W)-H(1WB) | 111.9     |
| C(21)-C(20)-H(20A) | 120.2     | C(1A)-O(1A)-Eu(1)   | 138.7(6)  |

|                     |           |                     |           |
|---------------------|-----------|---------------------|-----------|
| C(1C)-O(1C)-Eu(1)   | 142.5(6)  | F(3C)-C(2C)-F(2C)   | 109.4(16) |
| C(1B)-O(1B)-Eu(1)   | 174.9(6)  | F(3C)-C(2C)-F(1C)   | 109.2(10) |
| O(2C)-C(1C)-O(1C)   | 128.9(9)  | F(2C)-C(2C)-F(1C)   | 104.8(12) |
| O(2C)-C(1C)-C(2C)   | 117.2(7)  | F(2C')-C(2C)-F(3C') | 105.4(14) |
| O(1C)-C(1C)-C(2C)   | 114.0(8)  | F(1C')-C(2C)-F(3C') | 105.2(9)  |
| O(2A)-C(1A)-O(1A)   | 131.0(8)  | F(3C)-C(2C)-C(1C)   | 117.1(9)  |
| O(2A)-C(1A)-C(2A)   | 113.9(7)  | F(2C')-C(2C)-C(1C)  | 114.6(19) |
| O(1A)-C(1A)-C(2A)   | 115.1(7)  | F(1C')-C(2C)-C(1C)  | 112.1(8)  |
| O(2B)-C(1B)-O(1B)   | 129.3(9)  | F(2C)-C(2C)-C(1C)   | 107.8(18) |
| O(2B)-C(1B)-C(2B)   | 116.3(8)  | F(1C)-C(2C)-C(1C)   | 107.9(8)  |
| O(1B)-C(1B)-C(2B)   | 114.3(7)  | F(3C')-C(2C)-C(1C)  | 106.2(8)  |
| F(1B)-C(2B)-F(3B)   | 107.7(19) | F(2A)-C(2A)-F(3A)   | 111.3(17) |
| F(1B')-C(2B)-F(3B') | 106.8(18) | F(1A')-C(2A)-F(3A') | 111.4(18) |
| F(1B')-C(2B)-F(2B') | 108.2(19) | F(1A')-C(2A)-F(2A') | 107.3(10) |
| F(3B')-C(2B)-F(2B') | 105.8(17) | F(3A')-C(2A)-F(2A') | 105.4(15) |
| F(1B)-C(2B)-F(2B)   | 107.7(18) | F(2A)-C(2A)-F(1A)   | 102.8(9)  |
| F(3B)-C(2B)-F(2B)   | 106.5(17) | F(3A)-C(2A)-F(1A)   | 104.2(15) |
| F(1B')-C(2B)-C(1B)  | 114(4)    | F(1A')-C(2A)-C(1A)  | 114.6(10) |
| F(1B)-C(2B)-C(1B)   | 113(4)    | F(2A)-C(2A)-C(1A)   | 114.1(8)  |
| F(3B)-C(2B)-C(1B)   | 114(3)    | F(3A)-C(2A)-C(1A)   | 114(2)    |
| F(3B')-C(2B)-C(1B)  | 109(3)    | F(3A')-C(2A)-C(1A)  | 112(2)    |
| F(2B')-C(2B)-C(1B)  | 112(3)    | F(2A')-C(2A)-C(1A)  | 105.3(9)  |
| F(2B)-C(2B)-C(1B)   | 107(3)    | F(1A)-C(2A)-C(1A)   | 108.9(8)  |
| F(2C')-C(2C)-F(1C') | 112.4(13) | H(1SA)-O(1S)-H(1SB) | 106.5     |

---

Symmetry transformations used to generate equivalent atoms:

**Table 36 Anisotropic displacement parameters ( $\text{\AA}^2 \times 10^3$ ) for  $\text{PnPPoEu}(\text{TFA})_3\text{H}_2\text{O}$ . The anisotropic displacement factor exponent takes the form:  $-2\pi^2 [h^2 a^{*2} U^{11} + \dots + 2 h k a^* b^* U^{12}]$**

|       | U <sup>11</sup> | U <sup>22</sup> | U <sup>33</sup> | U <sup>23</sup> | U <sup>13</sup> | U <sup>12</sup> |
|-------|-----------------|-----------------|-----------------|-----------------|-----------------|-----------------|
| Eu(1) | 17(1)           | 18(1)           | 17(1)           | 1(1)            | 0(1)            | 1(1)            |
| P(1)  | 22(1)           | 22(1)           | 21(1)           | -2(1)           | -3(1)           | -2(1)           |
| P(2)  | 25(1)           | 24(1)           | 26(1)           | -4(1)           | -6(1)           | 1(1)            |
| O(1)  | 18(3)           | 33(4)           | 25(3)           | -2(3)           | 4(3)            | -2(3)           |
| O(2)  | 23(3)           | 21(3)           | 23(3)           | -2(3)           | -1(3)           | 2(3)            |
| N(1)  | 20(3)           | 16(3)           | 20(3)           | 3(3)            | 0(3)            | 0(3)            |
| N(2)  | 21(2)           | 19(3)           | 19(3)           | 1(4)            | 1(4)            | -2(2)           |
| C(1)  | 18(4)           | 19(4)           | 21(4)           | 3(3)            | 3(3)            | 2(3)            |
| C(2)  | 22(4)           | 25(4)           | 23(4)           | 2(3)            | -3(3)           | -1(3)           |
| C(3)  | 25(5)           | 30(5)           | 23(4)           | -2(3)           | 2(4)            | -1(4)           |
| C(4)  | 35(5)           | 20(4)           | 25(4)           | -7(3)           | 6(4)            | 4(4)            |
| C(5)  | 23(4)           | 24(4)           | 27(4)           | -1(3)           | 5(3)            | 3(3)            |
| C(6)  | 33(5)           | 38(5)           | 29(5)           | -3(4)           | 14(4)           | 2(4)            |
| C(7)  | 19(4)           | 37(5)           | 45(6)           | 0(4)            | 5(4)            | 3(4)            |
| C(8)  | 21(4)           | 19(5)           | 41(5)           | 0(4)            | 1(4)            | 2(3)            |
| C(9)  | 14(3)           | 32(4)           | 49(8)           | 7(5)            | 2(5)            | 0(3)            |
| C(10) | 20(4)           | 29(5)           | 33(5)           | -3(4)           | -6(4)           | -1(4)           |
| C(11) | 19(4)           | 21(4)           | 27(4)           | 3(3)            | -4(3)           | 0(3)            |
| C(12) | 21(4)           | 22(5)           | 20(4)           | 2(3)            | 4(3)            | 1(3)            |
| C(13) | 23(4)           | 30(5)           | 26(4)           | 1(4)            | -4(4)           | 9(4)            |
| C(14) | 54(6)           | 30(6)           | 26(4)           | -4(4)           | -7(4)           | -3(4)           |
| C(15) | 60(7)           | 20(5)           | 40(5)           | 3(4)            | 5(5)            | 6(5)            |
| C(16) | 41(6)           | 52(6)           | 29(5)           | 10(4)           | -8(4)           | 10(5)           |
| C(17) | 48(7)           | 40(7)           | 58(7)           | 9(6)            | -16(6)          | -22(5)          |
| C(18) | 32(5)           | 44(6)           | 35(5)           | 11(4)           | -11(4)          | -13(4)          |
| C(19) | 24(5)           | 33(5)           | 28(5)           | 0(4)            | 0(4)            | -6(4)           |
| C(20) | 32(5)           | 36(6)           | 47(6)           | 7(4)            | 1(4)            | 1(4)            |
| C(21) | 52(7)           | 35(6)           | 73(9)           | 6(6)            | -14(6)          | -9(5)           |
| C(22) | 77(9)           | 38(7)           | 85(10)          | 27(7)           | -11(8)          | -19(6)          |
| C(23) | 64(7)           | 60(7)           | 49(9)           | 28(6)           | -9(6)           | -18(5)          |
| C(24) | 44(6)           | 45(6)           | 37(6)           | 6(5)            | 3(5)            | -10(5)          |
| C(25) | 32(5)           | 37(5)           | 23(4)           | -7(4)           | -5(4)           | 7(4)            |
| C(26) | 43(6)           | 50(6)           | 40(6)           | 12(5)           | -13(5)          | -7(5)           |
| C(27) | 43(6)           | 44(6)           | 49(6)           | 8(5)            | -17(5)          | 6(5)            |
| C(28) | 73(8)           | 50(7)           | 36(6)           | 12(5)           | -2(6)           | 21(6)           |
| C(29) | 56(8)           | 66(8)           | 45(7)           | 26(6)           | 9(6)            | 7(6)            |
| C(30) | 32(5)           | 67(7)           | 35(5)           | 8(5)            | 2(4)            | 11(5)           |
| C(31) | 26(5)           | 31(5)           | 40(5)           | -8(4)           | -9(4)           | 4(4)            |
| C(32) | 36(5)           | 22(5)           | 50(6)           | -6(4)           | 1(5)            | -3(4)           |
| C(33) | 66(8)           | 28(6)           | 92(10)          | -7(6)           | 19(7)           | -5(5)           |
| C(34) | 65(8)           | 26(6)           | 113(13)         | -23(7)          | -8(8)           | -9(6)           |
| C(35) | 82(10)          | 46(8)           | 77(10)          | -29(7)          | -24(8)          | 12(7)           |
| C(36) | 60(7)           | 41(7)           | 47(8)           | -22(6)          | -21(6)          | 8(5)            |
| O(1W) | 33(4)           | 27(4)           | 25(3)           | 9(3)            | 8(3)            | 4(3)            |
| F(1A) | 56(4)           | 50(3)           | 49(3)           | 3(2)            | -3(3)           | 9(3)            |
| F(1B) | 46(17)          | 26(9)           | 54(9)           | 5(10)           | 5(10)           | 6(9)            |
| F(2B) | 87(15)          | 90(20)          | 45(13)          | -32(12)         | -22(14)         | 41(8)           |

|        |        |        |        |         |         |        |
|--------|--------|--------|--------|---------|---------|--------|
| F(2A)  | 56(3)  | 58(3)  | 60(4)  | 1(3)    | -7(3)   | 7(2)   |
| F(3B)  | 63(10) | 53(4)  | 88(19) | 32(16)  | 54(11)  | 26(9)  |
| F(3A)  | 77(17) | 30(5)  | 44(7)  | -5(6)   | 4(8)    | 9(7)   |
| F(3B') | 63(10) | 53(4)  | 88(19) | 32(16)  | 54(11)  | 26(9)  |
| F(2A') | 56(3)  | 58(3)  | 60(4)  | 1(3)    | -7(3)   | 7(2)   |
| F(2B') | 87(15) | 90(20) | 45(13) | -32(12) | -22(14) | 41(8)  |
| F(1A') | 56(4)  | 50(3)  | 49(3)  | 3(2)    | -3(3)   | 9(3)   |
| F(1B') | 46(17) | 26(9)  | 54(9)  | 5(10)   | 5(10)   | 6(9)   |
| F(3A') | 77(17) | 30(5)  | 44(7)  | -5(6)   | 4(8)    | 9(7)   |
| F(1C)  | 59(4)  | 57(3)  | 56(3)  | -8(2)   | 3(3)    | 0(3)   |
| F(2C)  | 47(4)  | 62(5)  | 28(12) | 7(10)   | -17(4)  | -15(3) |
| F(3C)  | 47(3)  | 38(3)  | 53(4)  | 1(3)    | 0(3)    | 3(2)   |
| F(1C') | 59(4)  | 57(3)  | 56(3)  | -8(2)   | 3(3)    | 0(3)   |
| F(2C') | 47(4)  | 62(5)  | 28(12) | 7(10)   | -17(4)  | -15(3) |
| F(3C') | 47(3)  | 38(3)  | 53(4)  | 1(3)    | 0(3)    | 3(2)   |
| O(1A)  | 24(2)  | 25(3)  | 32(3)  | 3(4)    | 2(4)    | 3(2)   |
| O(1C)  | 33(4)  | 31(4)  | 38(4)  | 14(3)   | 11(3)   | 10(3)  |
| O(1B)  | 32(3)  | 27(3)  | 26(3)  | 9(3)    | 6(3)    | 3(3)   |
| O(2A)  | 44(4)  | 34(4)  | 39(4)  | -3(3)   | 14(3)   | 10(3)  |
| O(2B)  | 103(6) | 47(4)  | 34(4)  | 15(3)   | 22(4)   | 35(4)  |
| O(2C)  | 72(5)  | 32(4)  | 51(5)  | -1(3)   | -28(4)  | 4(3)   |
| C(1C)  | 34(5)  | 22(4)  | 29(5)  | 4(3)    | 5(4)    | 1(4)   |
| C(1A)  | 23(4)  | 23(5)  | 32(5)  | -1(4)   | -3(4)   | -3(4)  |
| C(1B)  | 36(5)  | 20(5)  | 30(5)  | 5(4)    | 1(4)    | -1(4)  |
| C(2B)  | 33(6)  | 27(5)  | 40(5)  | 2(4)    | -4(5)   | 8(4)   |
| C(2C)  | 42(6)  | 43(6)  | 28(5)  | -4(4)   | 4(4)    | -1(5)  |
| C(2A)  | 32(6)  | 40(6)  | 36(6)  | -1(4)   | -6(4)   | 10(4)  |
| O(1S)  | 76(6)  | 55(5)  | 59(5)  | 30(4)   | 36(5)   | 10(4)  |

---

**Table 37** Hydrogen coordinates (  $\times 10^4$ ) and isotropic displacement parameters ( $\text{\AA}^2 \times 10^3$ ) for **PnPPOEu(TFA)3H2O**.

|        | x    | y     | z     | U(eq) |
|--------|------|-------|-------|-------|
| H(3A)  | 6388 | 4677  | 3124  | 31    |
| H(4A)  | 5233 | 4654  | 3261  | 32    |
| H(6A)  | 4109 | 4082  | 2757  | 40    |
| H(7A)  | 3479 | 3304  | 1787  | 40    |
| H(9A)  | 3436 | 2333  | 481   | 38    |
| H(10A) | 3991 | 1634  | -589  | 33    |
| H(14A) | 7332 | 2103  | 2763  | 44    |
| H(15A) | 7831 | 1557  | 3945  | 48    |
| H(16A) | 8491 | 2640  | 4694  | 49    |
| H(17A) | 8655 | 4256  | 4268  | 58    |
| H(18A) | 8182 | 4803  | 3065  | 45    |
| H(20A) | 7237 | 5838  | 2553  | 46    |
| H(21A) | 7524 | 7405  | 2044  | 64    |
| H(22A) | 7982 | 7540  | 757   | 80    |
| H(23A) | 8154 | 6151  | -15   | 69    |
| H(24A) | 7890 | 4569  | 481   | 50    |
| H(26A) | 4341 | 2097  | -1991 | 53    |
| H(27A) | 4270 | 3163  | -3087 | 54    |
| H(28A) | 5228 | 3926  | -3582 | 63    |
| H(29A) | 6253 | 3652  | -2987 | 67    |
| H(30A) | 6352 | 2559  | -1898 | 54    |
| H(32A) | 4953 | -102  | 15    | 43    |
| H(33A) | 4555 | -1703 | -198  | 74    |
| H(34A) | 4469 | -2335 | -1474 | 82    |
| H(35A) | 4789 | -1370 | -2562 | 82    |
| H(36A) | 5191 | 257   | -2400 | 59    |
| H(1WA) | 7531 | 3100  | -1050 | 34    |
| H(1WB) | 7635 | 2210  | -726  | 34    |
| H(1SA) | 7054 | 4282  | 8319  | 76    |
| H(1SB) | 7574 | 4431  | 7878  | 76    |

**Table 38 Hydrogen bonds for PnPPOEu(TFA)3H2O [Å and °].**

| D-H...A                | d(D-H) | d(H...A) | d(D...A)  | <(DHA) |
|------------------------|--------|----------|-----------|--------|
| O(1W)-H(1WA)...O(1S)#1 | 0.80   | 1.88     | 2.652(10) | 162    |
| O(1W)-H(1WB)...O(1A)#2 | 0.80   | 2.33     | 2.788(9)  | 117    |
| O(1W)-H(1WB)...O(2A)#2 | 0.80   | 1.91     | 2.713(9)  | 180    |
| O(1S)-H(1SA)...O(2B)#3 | 0.80   | 1.95     | 2.746(11) | 179    |
| O(1S)-H(1SB)...O(2C)#4 | 0.80   | 2.01     | 2.811(10) | 179    |

Symmetry transformations used to generate equivalent atoms:

#1 x,y,z-1    #2 x,y,z    #3 x,y,z+1    #4 -x+3/2,y+1/2,z+1/2



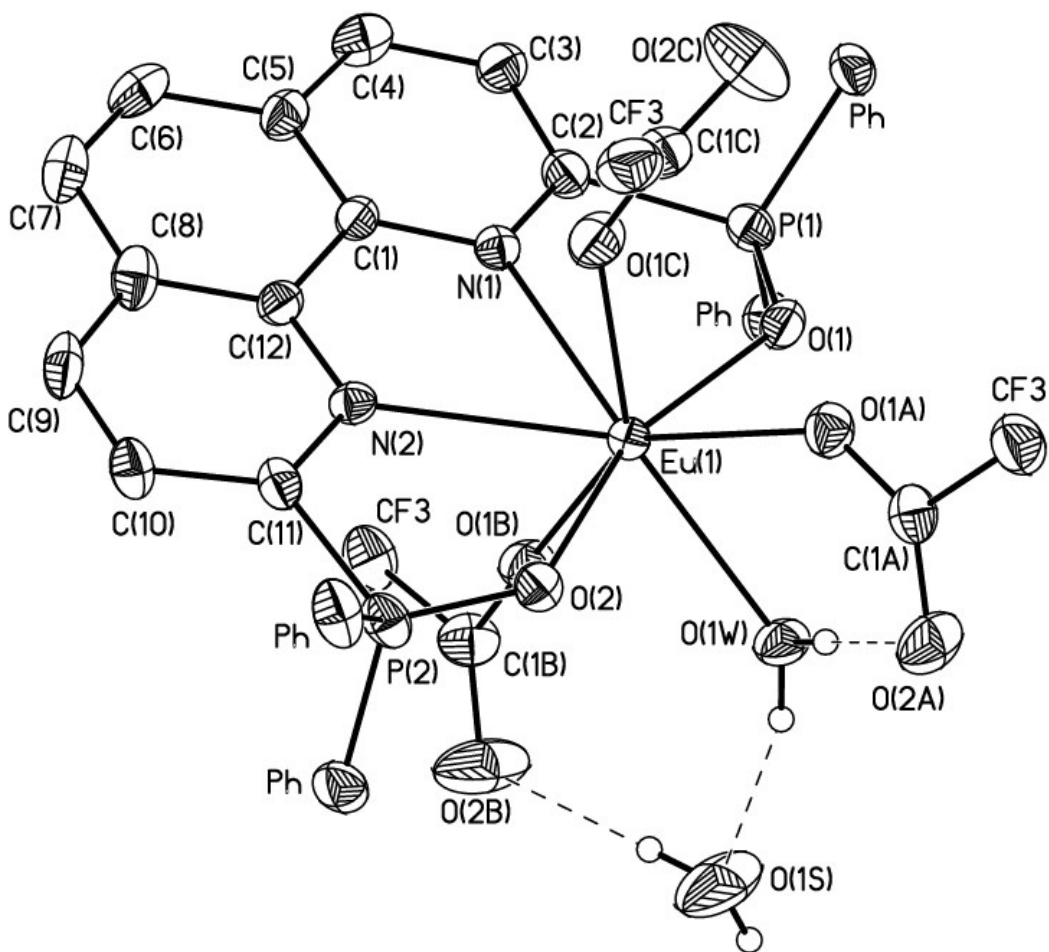

Figure 10 The independent part of the PnPPOEu(TFA)3H2O unit cell. Non-hydrogen atoms are given as probability ellipsoids of atomic displacements, hydrogen atoms at carbon atoms are omitted for clarity. The hydrogen bonds are shown by dashed lines.

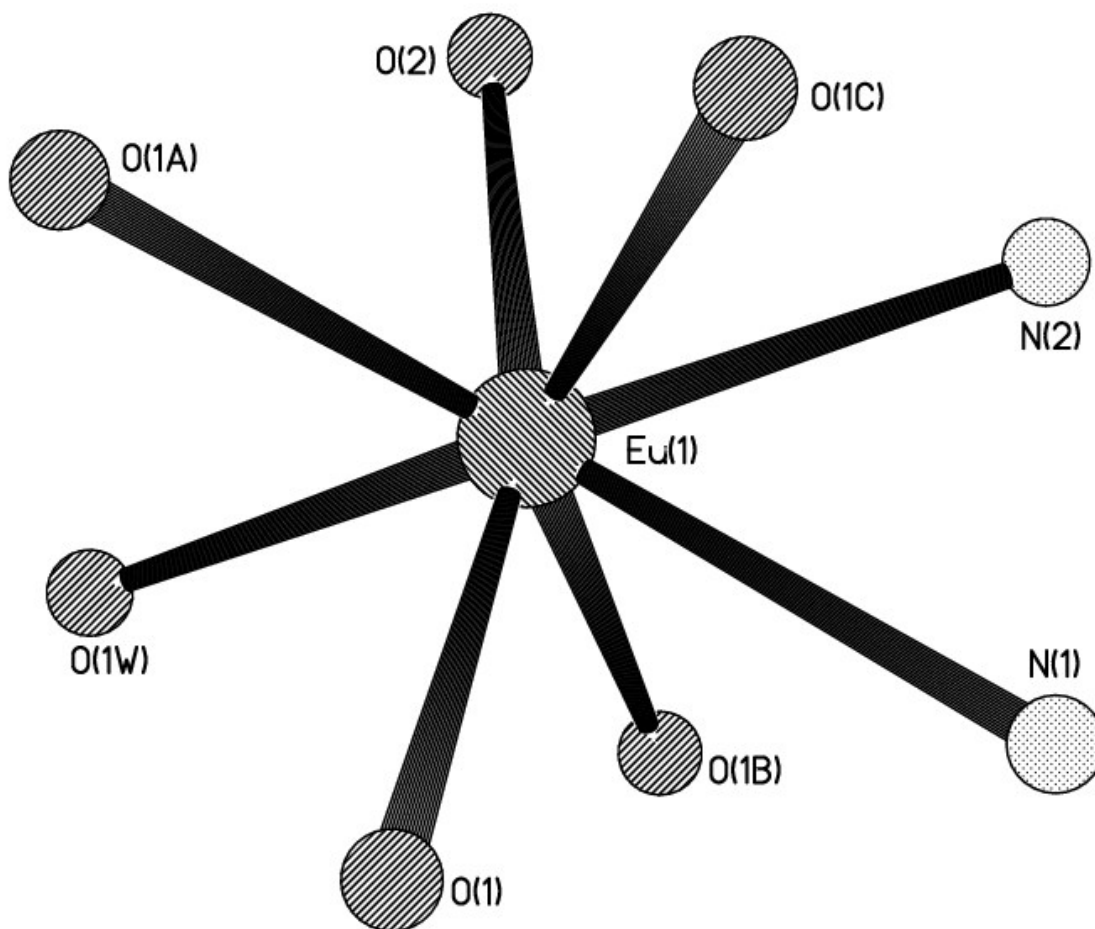

Figure 11 The distorted bicapped-trigonalantiprismatic environment of the Eu ion within the PnPPOEu(TFA)<sub>3</sub>H<sub>2</sub>O crystal: the O(2), O(1B), O(1W) and O(1A), O(1C), O(1) atoms form two bases of prism while the nitrogen atoms serve as two caps.

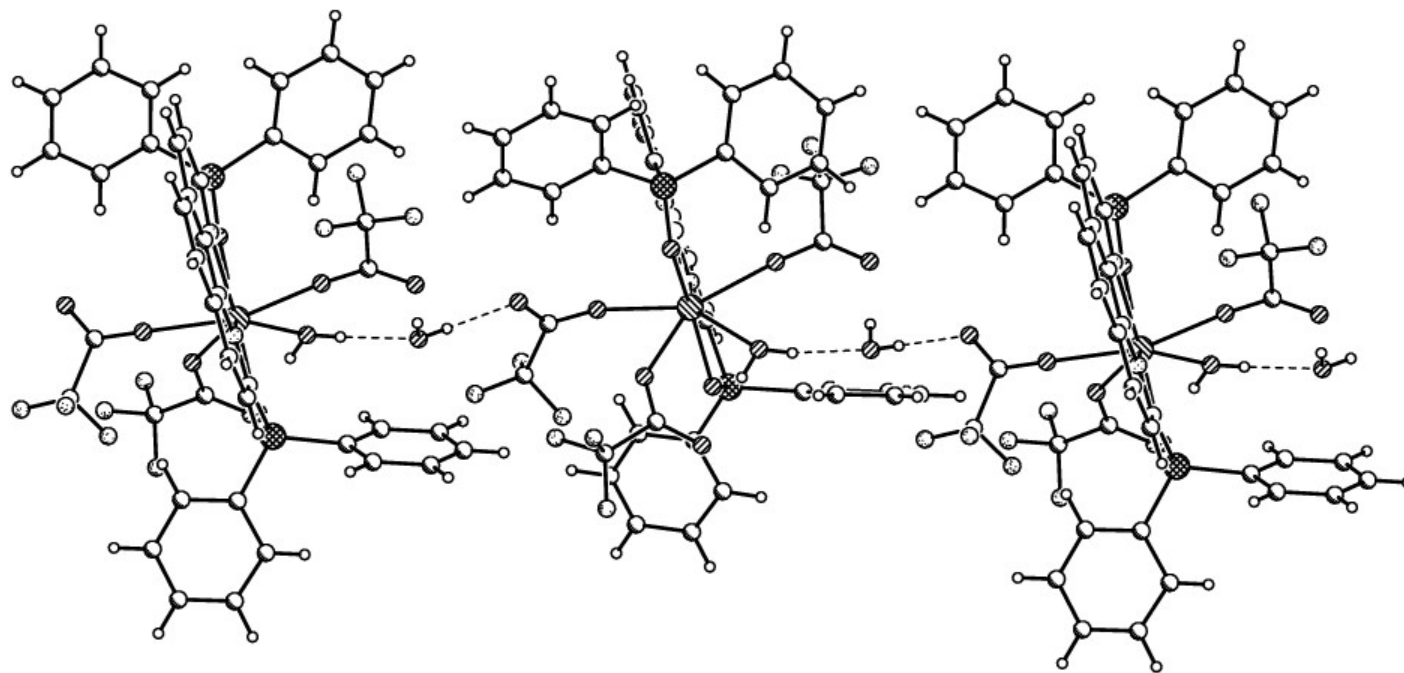

**Figure 12** A fragment of H-bonded chain within the  $\text{PnPPoEu}(\text{TFA})\cdot 3\text{H}_2\text{O}$  crystal.
